# Supplementary material for: The transcription factors Runx3 and ThPOK cross-regulate acquisition of cytotoxic function by human Th1 lymphocytes
Source: eLife journal article supplement (doi:10.7554/elife.30496), 2018-02-28
Supplement: supp [file elife-30496-supp-v1.zip]

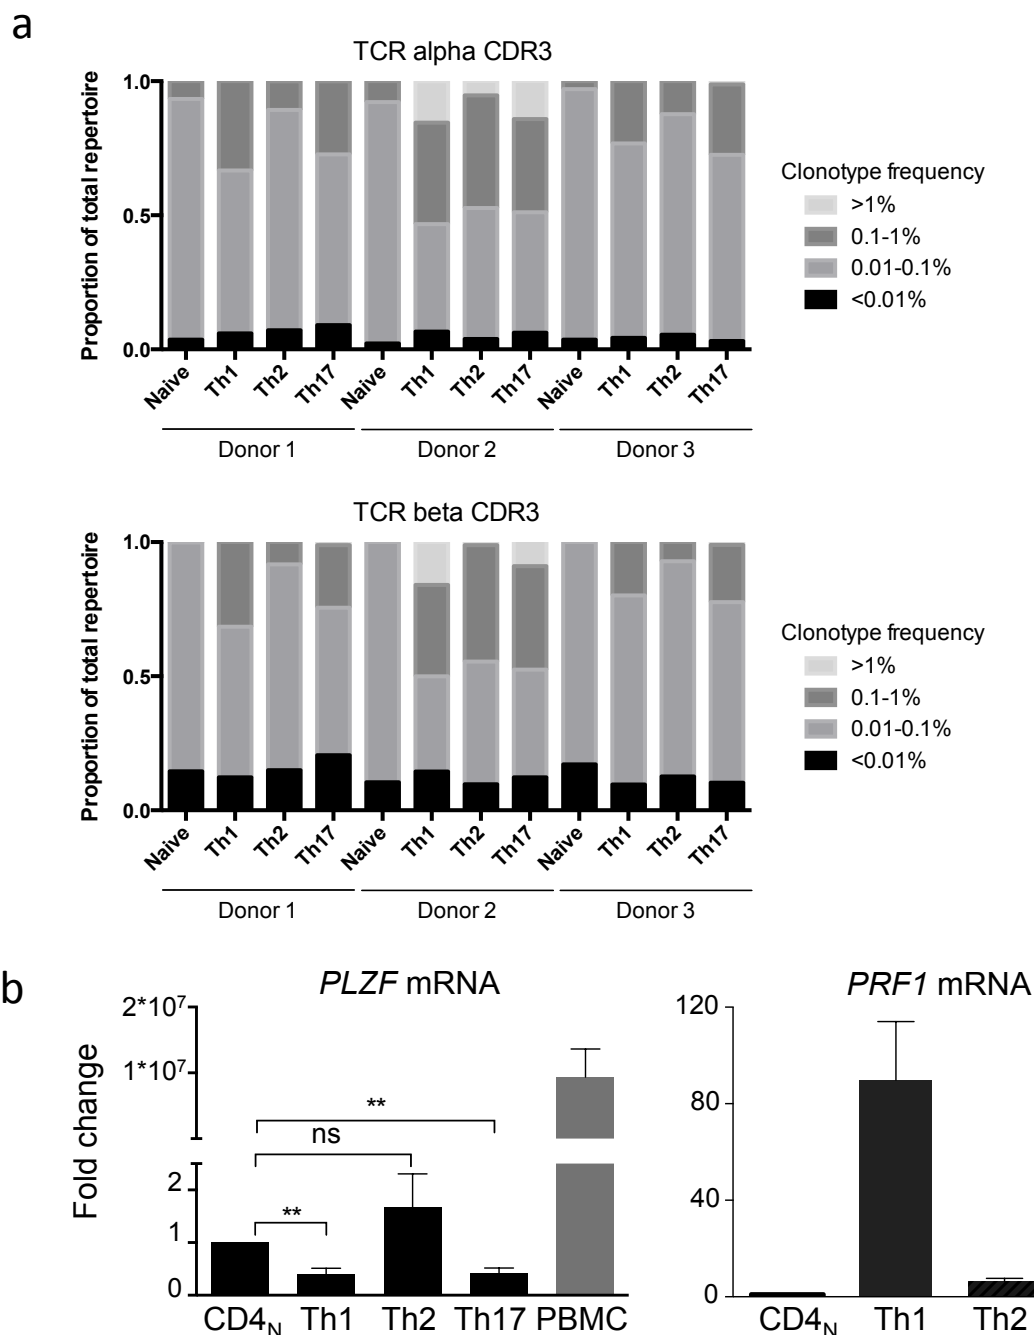

**Figure 6-figure supplement 1. TCR repertoire of and *PLZF* expression by *in vitro* differentiated CD4 T cells.** **a)** TCR alpha and beta repertoires of CD4 T cells was determined by CDR3 RACE PCR and sequencing at day 0 (Naive) and after 14 days of activation in the presence of polarizing cytokines. Data were obtained from 3 independent experiments on 3 different donors. Between 3000 and 6000 unique clonotypes were sequenced per experimental condition. Diverse repertoires including large (>1%) and medium (0.1-1%) clonotype expansions were detected in differentiated CD4 T cells. **b)** *PLZF* and *PRF1* mRNA expression by naive and differentiated CD4 T cells was measured by qPCR. Data are mean  $\pm$  SEM fold change as compared to naive cells from 7 independent experiments. \*\*:p<0.01. *PRF1* mRNA expression data are the same as those presented in Figure 6e. Th1 and Th17 cells had lower expression of *PLZF* mRNA. Together, these results indicate that CD4 T cells differentiated in the presence of Th1 cytokines have features of conventional and not innate-like lymphocytes.
