# Supplementary material for: The transcription factors Runx3 and ThPOK cross-regulate acquisition of cytotoxic function by human Th1 lymphocytes
Source: eLife journal article supplement (doi:10.7554/elife.30496), 2018-02-28
Supplement: supp [file elife-30496-supp-v1.zip]

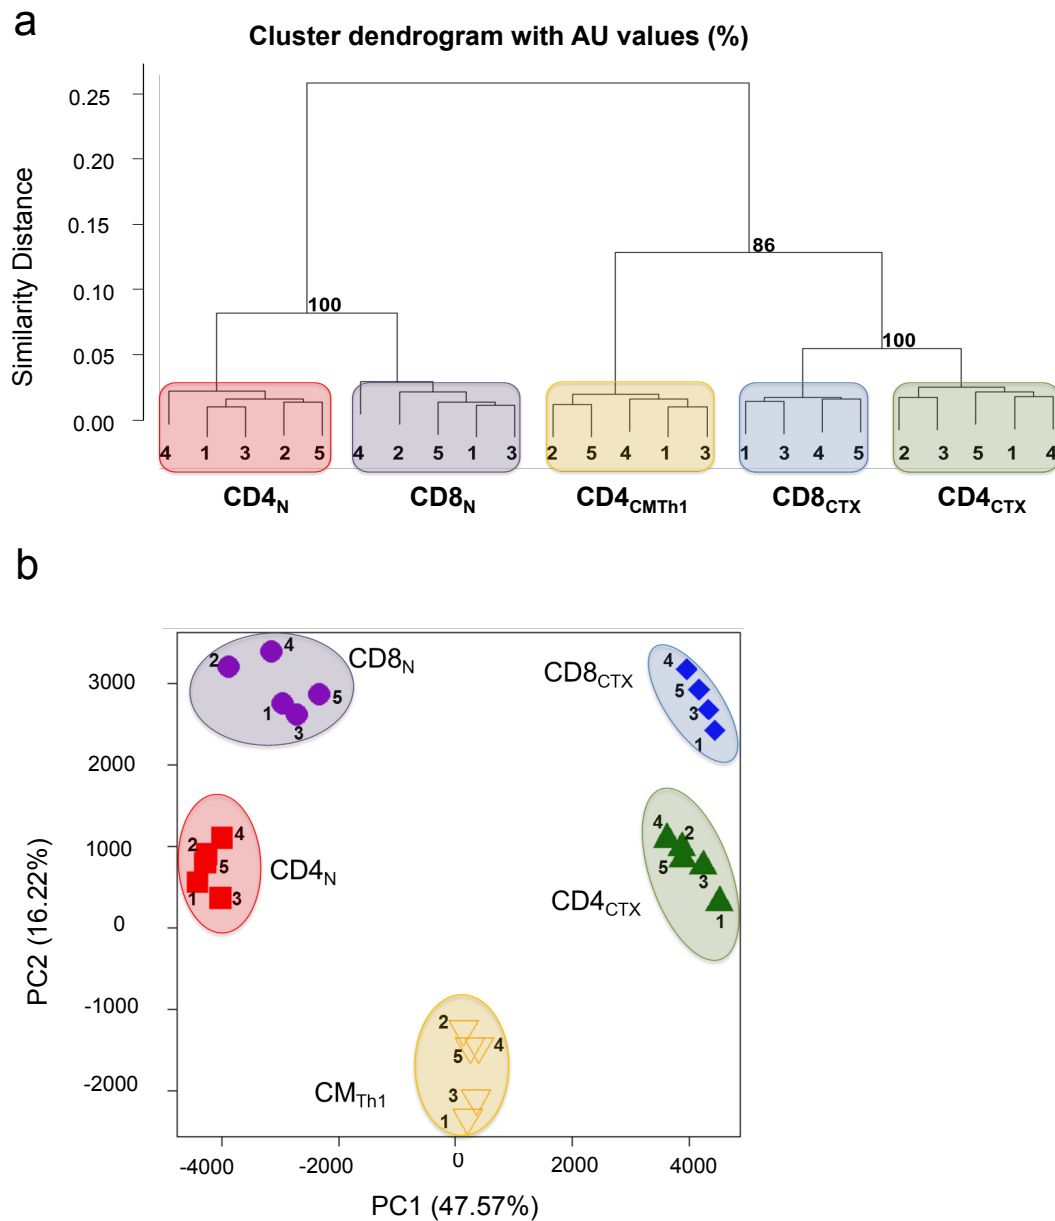

**Figure 3-figure supplement 2. Sorting strategy of central memory CD4 T cell subsets and expression of candidate genes. a-b)** The transcriptome of CD4 and CD8 T cell subsets purified from 4 to 5 CMV-seropositive donors was analysed by genome-wide mRNA expression arrays. Log2 expression values of 13,551 probes with a variance>0.01 corresponding to 10,699 unique genes were submitted to hierarchical clustering (**b**) and principal component (**c**) analyses.
