# Supplementary material for: The transcription factors Runx3 and ThPOK cross-regulate acquisition of cytotoxic function by human Th1 lymphocytes
Source: eLife journal article supplement (doi:10.7554/elife.30496), 2018-02-28
Supplement: supp [file elife-30496-supp-v1.zip]

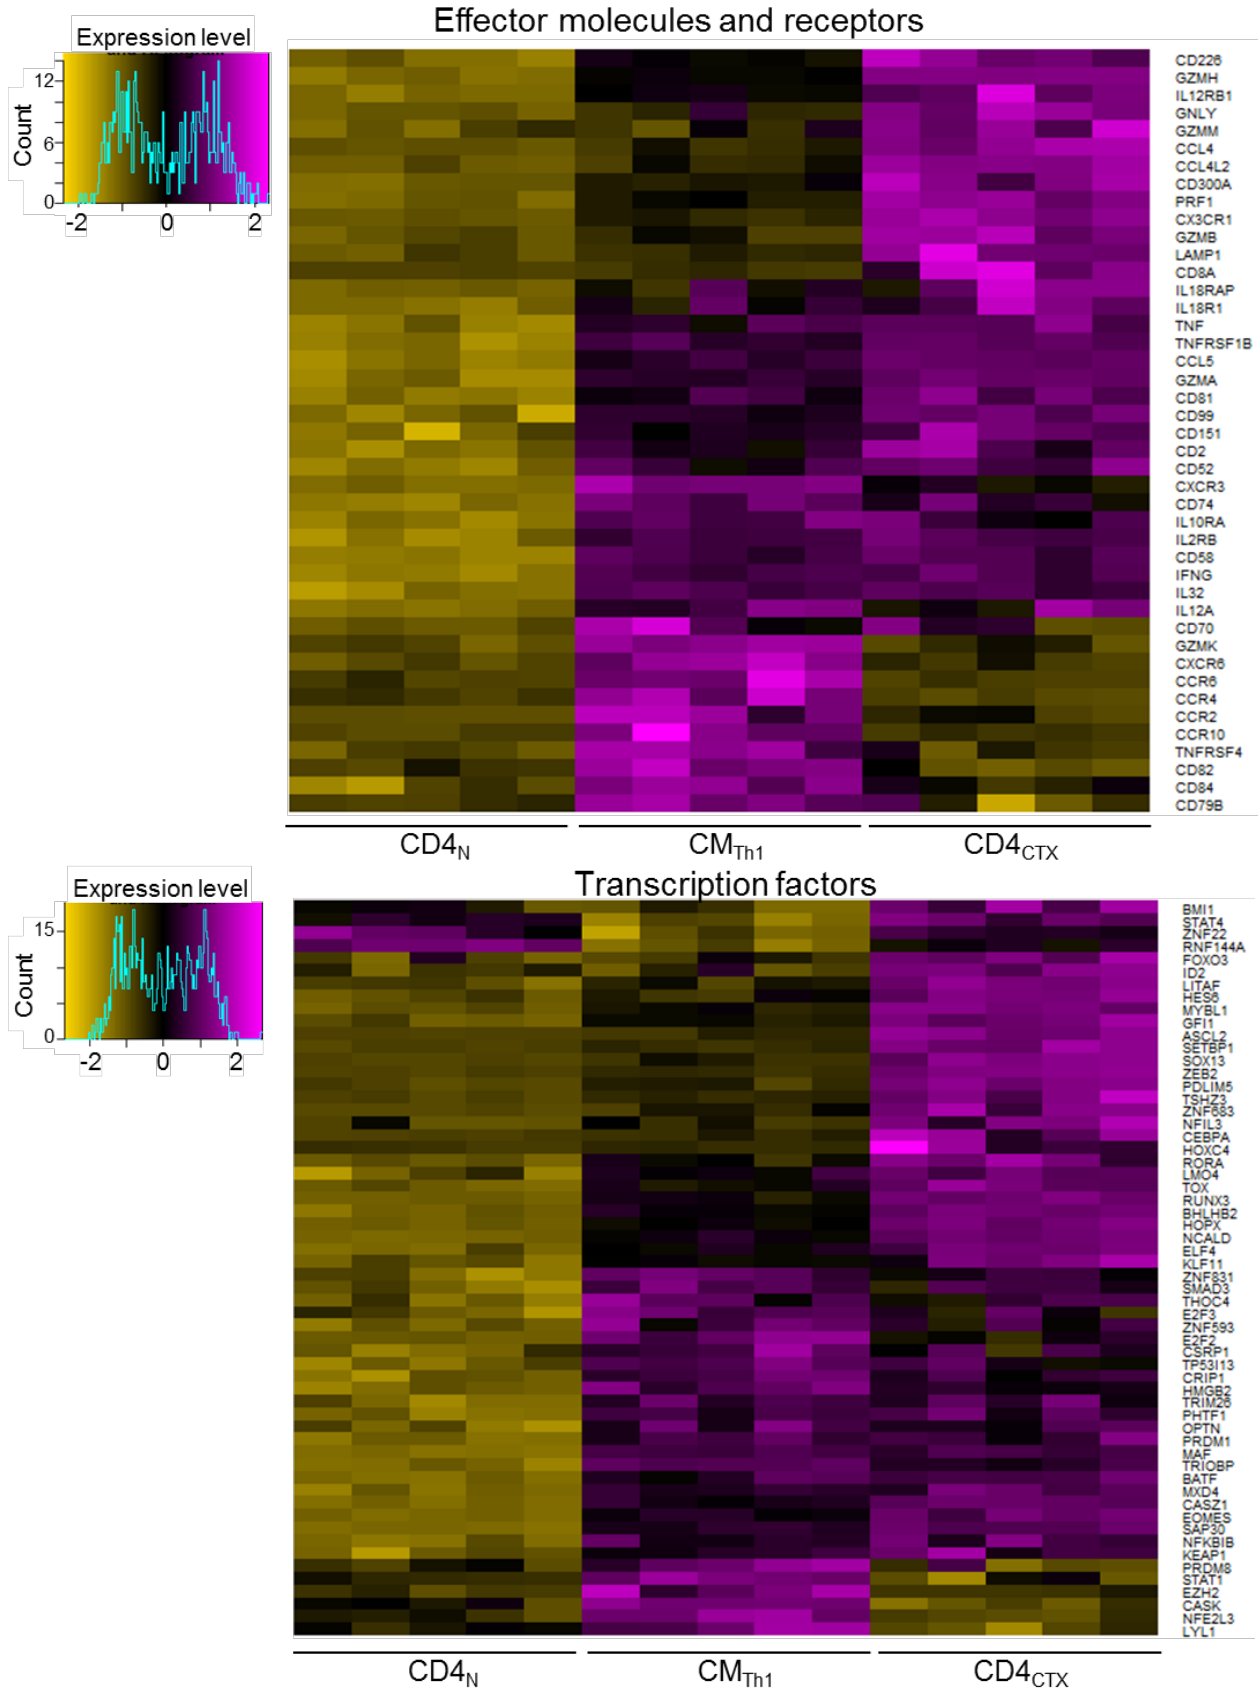

**Figure 5-figure supplement 1. Transcriptional program of CM<sub>Th1</sub> and CD4<sub>CTX</sub> T cells.** Heatmaps of mean log2 expression values of all probes for selected effector molecules and receptors (c) and transcription factors (d) up regulated in CM<sub>Th1</sub> as compared to CD4<sub>N</sub> T cells or in CD4<sub>CTX</sub> T cells as compared to CM<sub>Th1</sub> cells.
