# Supplementary material for: The transcription factors Runx3 and ThPOK cross-regulate acquisition of cytotoxic function by human Th1 lymphocytes
Source: eLife journal article supplement (doi:10.7554/elife.30496), 2018-02-28
Supplement: supp [file elife-30496-supp-v1.zip]

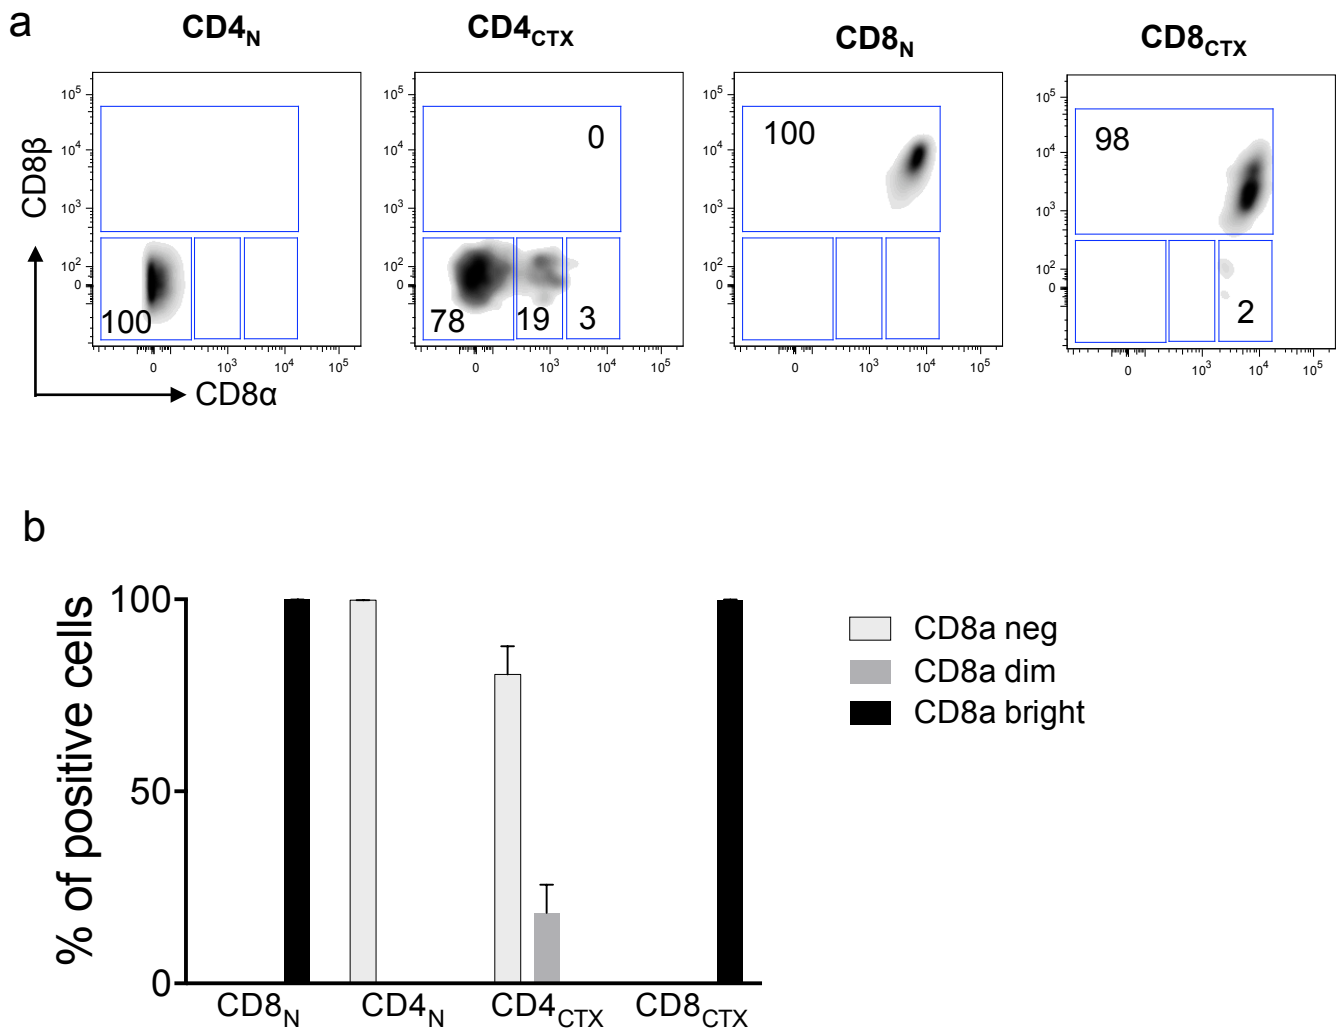

**Figure 1-figure supplement 1. Expression of CD8 subunits by CD4<sub>CTX</sub> T cells.** The expression of CD8 $\alpha$  and CD8 $\beta$  subunits by naive and cytotoxic CD4 and CD8 T cells was measured by flow cytometry. **a)** Dot plot of a representative donor. **b)** Percentage of cells expressing no (neg), intermediate (dim) or high (bright) levels of the CD8 $\alpha$  subunit. Data are mean $\pm$ SEM % from 3 CMV-seropositive donors (b). The CD8 $\beta$  subunit was only expressed by CD8 T cells whereas a proportion of CD4<sub>CTX</sub> cells expressed intermediate levels of CD8 $\alpha$ .
