# Supplementary material for: The transcription factors Runx3 and ThPOK cross-regulate acquisition of cytotoxic function by human Th1 lymphocytes
Source: eLife journal article supplement (doi:10.7554/elife.30496), 2018-02-28
Supplement: supp [file elife-30496-supp-v1.zip]

Archive with 21 entries (21 files):
- elife_poa_e30496_Figure_6_source_data_1.xlsx
- elife_poa_e30496_Figure_3_figure_supplement_1.pdf
- elife_poa_e30496_Supplementary_File_2.docx
- elife_poa_e30496_Figure_5_figure_supplement_1.pdf
- elife_poa_e30496_Figure_1_figure_supplement_1.pdf
- elife_poa_e30496_Supplementary_File_3.docx
- elife_poa_e30496_Figure_4_source_data_1.xlsx
- elife_poa_e30496_Figure_6_figure_supplement_1.pdf
- elife_poa_e30496_Transparent_Reporting_File.docx
- elife_poa_e30496_Figure_3_figure_supplement_2.pdf
- elife_poa_e30496_Figure_2_source_data_1.xlsx
- elife_poa_e30496_Figure_3_source_data_1.xlsx
- elife_poa_e30496_Figure_7_source_data_1.xlsx
- elife_poa_e30496_Figure_5_source_data_1.xlsx
- elife_poa_e30496_Figure_6_figure_supplement_2.pdf
- elife_poa_e30496_Figure_7_figure_supplement_1.pdf
- elife_poa_e30496_Figure_1_source_data_1.xlsx
- elife_poa_e30496_Figure_7_figure_supplement_2.pdf
- elife_poa_e30496_Figure_5_figure_supplement_2.pdf
- elife_poa_e30496_Supplementary_File_1.xls
- elife_poa_e30496_Figure_2_figure_supplement_1.pdf
