# Supplementary material for: The transcription factors Runx3 and ThPOK cross-regulate acquisition of cytotoxic function by human Th1 lymphocytes
Source: eLife journal article supplement (doi:10.7554/elife.30496), 2018-02-28
Supplement: supp [file elife-30496-supp-v1.zip › elife_poa_e30496_Figure_1_source_data_1.xlsx]

## Sheet: Figure 1
Figure 1-source data1. Phenotype and function of in vivo differentiated perforin+ human CD4 T cells.
Figure 1b % of Perforin+-GranzymeB+ cells among total CD4 T cells
CMV+	CMV-
1.99	0.916
10.7	1.5
5.35	1.18
5.66	0.0751
8.8	1.28
4.53
9.83
21.7
7.12
10.7
12.3
Figure 1e: log2 fold change PRF1 mRNA expression as compared to naive CD4 T cells
Naive CD4	Naive CD8	CD4 CD28-	CD8 CD27-
1	0.784584	49.5221	36.5044
1	2.96905	82.7106	85.0359
1	1.625	67.649	70.035
1	2.532	202.251	195.361
1	3.387	134.364	182.278
Figure 1f % of lysis in each subset. (ND: not done)
E-T ratio	Naive CD4			Naive CD8			CTX CD4			CTX CD8			CD4 CD28- + ConA
1/1	0.001	0.544	0.317	0.964	1.28	0.254	5.748	0.02	1.68	11.619	0.66	5.56	0.0135	0.31	ND
5/1	0.169	0.888	0.1785	3.572	0.63	0.832	19.331	6.07	7.69	33.42	4.98	42.08	0.452	0.68	ND
20/1	0.392	0.026	0.039	6.676	1.69	1.896	33.913	27.67	27.99	39.5	18.7	71.87	1.31	6.07	ND
Fig 1g: methylation level for each CpG for each indicated T cell population
CpG number	Naive CD4									Naive CD8									HEL-299									CD4 CD28-									CD8 CD27-
1	91.95	95.78	100	100	100	96.18	100	100	94.53	100		94.67	96.13	100	100	92.8	100	100	92.15	92.25	91.83	91.29	91.85					28.74	16.53	42.27	20.53	35.97					18.15	24.29	27.66	22.47	22.53	43.42	23.21	18.2	22.97
2	99.81	93.77	97.46	94.26	96.71	95.27	90.99	94	97.13	97.21		99.55	94.62	97.71	84.25	96.01	92.4	100	86.72	81	84.93	79.57	82.57					33.42	18.13	57.43	27.85	48					24.01	21.42	33.64	31.86	22.48	49.74	26	15.47	23.61
3	100	99.82	97.27	97.9	97.44	97.46	96.06	94.62	100	100		95.01	98.44	95.08	100	97.6	98.11	96.69	90.88	90.91	89.16	91.21	90.2					39.95	16.35	38.71	24.75	35.43					11.12	23.41	25.55	21.89	24.54	38.82	20.34	14.85	19.71
4	87.24	85.7	91.08	86.46	88.89	89.3	86.22	88.93	88.35	81.41		85.26	83.66	78.98	74.38	85.09	83.24	100	85.94	84.73	84.16	83.6	83.71					22.32	8.21	39.78	17.49	29.14					18.53	22.68	21.82	21.37	17.56	36.83	23.59	11.19	14.29
6	100	96.97	96.39	96.14	96.19	95.65	96.13	96.39	96	88.18		79.79	93.58		93.26	94.64	94.17	95.02	87.36	86.85	81.97	87.11	80.88					0	8.97	34.93	15.7	24.71					10.81	11.94	14.61	10.27	7.78	20.77	18.2	12.7	7.35
7	95.64	94.79	94.16	94.56	94.35	94.87	94.66	95.06	94.91	93.4		84.53	89.43		89.82	93.55	92.63	94.15	90.99	89.92	90.62	89.42	89.41					2.36	0	6.11	2.77	3.76					1.83	5.27	0	2.08	3.8	4.06	6.02	1.37	3.02
8	100	97.07	100	98.53	99.82	98.46	99.59	100	98.26	99.94		85.92	92.77		96.71	98.74	99.3	98.36	81.56	81.22	79.27	82.48	79.07					4.61	0	7.59	4.74	5.91					3.43	5.8	2.86	3.65	5.34	5.73	8	3.85	4.58
9	96.57	95.56	97.55	97.05	97.62	100	100	100	100	96.11		84.25	90.68		87.14	92.71	94.68	97.14	88.31	88.86	87.22	88.73	87.05					0	0	5.95	11.18	0					1.99	0	2.36	2.38	0	7.35	10.02	1.73	0
10	94.64	94.02	93.77	94.01	94.14	94.66	94.41	94.58	94.32	93		80.4	87.88		85.6	90.94	92.48	94.47	85.56	84.96	85.7	83.72	83.91					3.64	7.13	10.73	9.64	0					4.36	5.98	2.86	2.58	3.65	7.5	10.54	3.07	4.34
14	89.36	22.64	92.47	95.24	95.93	96.67	94.38	96.18	96.12	90.47		82.75	100			94.91	84	100	78.14	77.94	78.1	74.18	77.52					0	0	22.49	5.92	4.99					0	1.49	3.13	0	4.8	0	9.48	0	4.23
15	95.68	95.65	96.05	96.53	95.62	97.15	97.1	96.52	96.19	96.27		88.12	91.42		92.96	96.02	93.66	95.79	74.02	71.88	74.39	72.57	73.55					4.38	0	10.04	5.02	6.24					2.21	3.84	1.68	2.65	5.07	5.09	6.97	0	3.48
16	98.39	94.36	97.55	93.56	97.97	95.5	99.52	95.01	100	83.74		74.88	80.85		83.85	86.54	83.51	84.25	64.61	66.47	63.14	63.91	63.45					3.2	2.49	12.3	7.17	7.43					3.27	3.66	2.85	3.47	3.96	5.77	9.1	3.36	3.03
17	95.05	90.78	95.23	93.29	96.66	98.55	99.24	95.53	98.01	69.74		64.48	71.34		69.16	100	72.02	70.77	78.39	77.3	74.87	76.65	76.44					4.86	0	10.31	6.54	7.1					2.66	4.1	3.08	3.64	4.04	5.06	8.88	4.11	3.84
18	62.95	75.66	64.56	65.36	65.87	75.6	78.82	78.94	64.87	19.64	18.43	20.65	24.06	21.4	22.39	30.37	27.16	18.14	86.19	71.4	87.22	85.58	82.09					3.54	0	0	3.46	3.72					0	0	0	0	3.38	16.6	5.71	2.48	2.99
19	82.53	79.64	76.61	71.43	69.63	82.06	80.78	81.39	68.9	31.63	29.61	31.54	37.1	32.74	25.89	39.57	38.37	29.97	92.02	97.91	91.86	100	92.61					5.33	3.17	4.47	3.66	4.6					3.8	3.49	0	0	3.17	0	7.23	2.11	4.08
20	69.12	83.02	73.87	73.03	75.59	77.82	79.39	82.65	75.06	47.97	37.67	43.69	50.91	45.27	46.26	52.14	48.73	44.19	85.69	81.55	82.59	100	84.12					2.83	3.03	4.39	3.07	4.24					0	0	0	0	2.81	0	5.57	1.85	0
21	62.51	69.61	69.79	65.58	67.72	71.59	77.25	75.2	63.24	27.67	27.87	26.63	36.72	30.24	30.28	42.7	34.25	30.63	85.74	75.24	68.9	69.9	75.48					5.88	0	3.74	3.48	3.37					0	3.96	0	2.71	3.34	9.03	6.17	0	3.22
22	51.84	60.69	63.25	58.09	57.71	63.47	65.86	62.74	53.87	24.22	23.16	26.04	27.89	22.92	18.49	31.34	26.77	31.36	75.46	73.73	77.39	74.92	77.94					9.02	1.87	4.92	5.47	6.25					2.15	3.04	2.64	4.13	2.16	7.85	7.29	1.89	6.46
23	60.91	70.16	72.49	63.51	68.75	68.43	72.34	69.9	59.56	30.96	27.22	31.86	36.07	29.76	31.41	39.85	33	39.81	78.14	75.3	78.16	77.47	79.67					14.44	7.37	9.33	7.86	10.75					6.58	8.13	5.93	7.78	7.22	8.81	11.85	6.74	12.1
24	26.91	33.43	36.34	36.99	30.43	38.45	45.08	38.78	20.96	4.67	0	6.22	4.85	0	7.14	5.29	4.11	0	78.14	81.14	82.96	76.49	80.66					5.4	0	4.01	3.99	0					4.58	0	0	3.69	2.64	0	3.02	0	3.15
25	4.51	4.76	4.26	4.42	2.38	4.54	6.18	4.59	2.75	3.24	2.73	1.56	2.3	0	0	0	0	0	63.23	51.74	55.52	54.25	53.23					3.07	3.13	2.09	2.55	0					0	2.16	2.22	0	1.81	0	1.76	1.83	1.61
26	18.45	29.51	20.81	19.15	15.79	26.27	24.23	24.5	16.17	1.59	2.96	1.42	1.93	0	0	2.41	1.83	0	85.65	80.12	81.53	79.2	83.21					3.85	1.83	0	2.78	0					0	2.52	1.81	0	1.32	0	2.4	0	0
27	21.09	28.21	24.16	23.33	18.05	31.64	30.92	30.82	18.67	2.4	2.18	1.58	1.94	2.21	2.57	3.11	2.67	2.35	92.89	85.83	85.01	83	84.45					3.75	0	1.45	2.69	2.56					0	2.18	0	0	1.4	1.57	2.63	0	1.3
28	12.7	11.62	11.59	13	7.31	15.71	16.7	6.45	6.21	1.56	2.06	0	1.52	0	3.36	1.76	0	0	93.44	68.75	67.67	67.95	57.54					3.36	0	0	2.88	1.91					0	2.63	0	0	1.23	1.17	2.31	1.24	1.26
29	2.08	2.33	2.16	2.54	1.77	3.35	4.25	2	1.83	1.67	1.62	1.18	1.38	1.02	0.63	2.29	3.58	1.66	88.84	89.05	87.27	86.43	88.19					2.11	1.39	1.55	1.82	1.69					1.42	1.66	1.37	1.49	1.31	2.61	2.5	2.07	1.45
30	1.77	1.69	1.96	1.85	2.14	2.29	3.16	2.58	2.06	1.57	2	1.5	1.39	1.5	2.97	2.59	5.11	1.82	80.68	80.21	78.99	77.73	79.65					2.17	1.49	1.4	1.59	2.42					1.44	1.69	1.61	1.37	1.71	3.2	3.59	3.37	2.35
31	5.05	4.54	4.44	3.8	3.25	5.28	6.37	3.57	4.39	2.9	3.43	3.83	2.75	2.26	2.33	4.31	4.02	4.14	79.17	78.99	78.32	78.74	76.98					3.49	2.96	2.67	3.55	3.19					3.08	3.17	2.72	3.18	2.65	2.81	4.18	3.42	3.12
32	6.42	6.39	6.08	7.05	3.28	5.68	8.57	4.29	4.61	3.61	2.86	1.43	4.65	3.67	2.02	1.4	1.53	1.74	87.16	89.6	89.07	87.74	88.79					1.64	5.09	1.7	2.41	5.83					2.98	2.45	2.98	4.13	2.8	2.09	4.33	1.85	4.26
33	0	1.2	1.14	0.89	1.32	1.05	1.26	1.03	1	0.89	0	0.94	0.84	0.81	0	0.82	0	1.23	58.17	60.26	61.62	63.29	57.69					1.11	0	0	1.05	0					0	1.2	0	0	0	0	0	0.87	1.24
34	4.11	6.03	4.55	4.43	4.18	6.49	7.64	6.33	5.45	3.45	4.03	2.56	2.32	2.39	3.29	4.29	3.1	4.07	70.76	73.9	72.18	72.28	73.51					4.5	2.48	3.22	3.75	4.47					3.04	3.75	2.7	2.7	2.86	3.13	4.86	3.17	3.2
