# Supplementary material for: The transcription factors Runx3 and ThPOK cross-regulate acquisition of cytotoxic function by human Th1 lymphocytes
Source: eLife journal article supplement (doi:10.7554/elife.30496), 2018-02-28
Supplement: supp [file elife-30496-supp-v1.zip › elife_poa_e30496_Figure_2_source_data_1.xlsx]

## Sheet: Figure 2
Figure 2-source data 1. The transcriptional program of CD4CTX T cells is enriched in CD8 lineage genes without down regulation of ThPOK
Figure 2d. mRNA expression measured by qPCR. Log2 fold change as compared to naive CD4 or naive CD8 as indicated.
RUNX3					TBX21					EOMES					ZBTB7B
Naive CD4	Naive CD8	CTX CD4	CTX CD8		Naive CD4	Naive CD8	CTX CD4	CTX CD8		Naive CD4	Naive CD8	CTX CD4	CTX CD8		Naive CD4	Naive CD8	CTX CD4	CTX CD8
1	2.5	11	12.6		1	5.50217	1160.07	942.272		1	1.62451	156.498	78.249		6.6	1	30.9	16.3
1	1.9	8.8	10.5		1	3.605	240.518	198.088		1	3.09513	159.786	72.5046		10.4	1	32.4	16.8
1	1.283	7.21	9.19		1	0.901	145.009	200.854		1	2.676	56.493	98.36		8.1	1	51.3	17.5
1	1.537	14.621	13.833		1	0.637	639.145	760.076		1	4.563		164.279		5.736	1	13.361	10.703
1	1.84	11.314	10.778		1	2.071	873.098	729.114		1	5.979	106.891	97.681		5.657	1	27.665	13.642
															7.568	1	22.316	13.086
Figure 2e. Protein expression measured by FACS. MFI.
RUNX3					TBX21					EOMES					ZBTB7B
naive CD4	CD4CTX	CD8 naive	CD8CTX		naive CD4	CD4CTX	CD8 naive bis	CD8CTX		naive CD4	CD4CTX	CD8 naive bis	CD8CTX		naive CD4	CD4CTX	CD8 naive bis	CD8CTX
4212	7772	5759	8194		460	3089	441	2844		375	731	379	839		713	631	306	383
3747	8645	5189	8918		456	3364	559	2751		361	708	463	1155		710	703	290	359
3384	7654	5249	7853		449	2511	413	2054		384	955	420	1163		832	1005	282	479
2889	7670	4937	8520		412	2354	615	2045		535	794	859	1376		798	780	287	423
3195	7271	5329	7800		403	2287	657	1990		325	531	871	1047		751	545	288	322
2811	7324	4509	7297		406	2073	497	1368		313	649	559	1274		721	608	313	335
Figure 2g. Raw methylation level (beta values) for probes included in the heatmaps.
RUNX3
IlmnID	HD189_naiveCD4	HD194_naiveCD4	HD240_naiveCD4	HD274_naiveCD4	HD361_naiveCD4	HD189_CD428-	HD194_CD428-	HD240_CD428-	HD274_CD428-	HD361_CD428-	HD189_naiveCD8	HD194_naiveCD8	HD240_naiveCD8	HD274_naiveCD8	HD361_naiveCD8	HD189_CD827-	HD194_CD827-	HD240_CD827-	HD274_CD827-	HD361_CD827-	UCSC_RefGene_Name	UCSC_RefGene_Group
cg00929376	0.935488827	0.901234658	0.905216557	0.898563539	0.904503731	0.942504296	0.876108376	0.910915167	0.901705223	0.901780618	0.924354587	0.903357643	0.883230617	0.911855798	0.933908784	0.930293045	0.921890918	0.898551091	0.915151684	0.892638971	RUNX3_1	TSS1500;Body
cg02970551	0.215874328	0.184572361	0.193652719	0.194969675	0.165270464	0.123034387	0.073895492	0.059359359	0.080595218	0.062160455	0.149417525	0.156980837	0.130761099	0.155551823	0.153356481	0.065768245	0.05792657	0.054711246	0.064989733	0.061997841	RUNX3_2	TSS1500;Body
cg04221877	0.830487174	0.824704355	0.81277533	0.834874691	0.846075778	0.865702177	0.809495549	0.782403821	0.802161855	0.808911202	0.699309193	0.684866869	0.652650377	0.686948343	0.761762757	0.746144378	0.817288163	0.782713085	0.767468916	0.814254535	RUNX3_3	TSS1500;Body
cg04250451	0.961158	0.969777171	0.973070782	0.963551884	0.970819884	0.973679756	0.968854044	0.970112421	0.966081962	0.969126048	0.963994196	0.973871548	0.967669511	0.962130071	0.96893641	0.967777034	0.976719004	0.967025862	0.965354179	0.965570646	RUNX3_4	TSS1500;Body
cg04554131	0.060234913	0.069859197	0.053919585	0.062986102	0.072072763	0.060963722	0.069539925	0.061297288	0.071018325	0.057799591	0.068457508	0.0776196	0.061428375	0.068712709	0.052341608	0.075859559	0.070973439	0.065036991	0.068799136	0.058260711	RUNX3_5	TSS200
cg04907595	0.620482277	0.761406094	0.631086635	0.636108919	0.586333534	0.768376038	0.802739783	0.767735472	0.731631379	0.698627416	0.712288399	0.739030996	0.665974793	0.751651043	0.585445492	0.862100264	0.86503385	0.779368348	0.795160297	0.694494269	RUNX3_6	TSS1500;Body
cg06037693	0.886730656	0.902638233	0.89330854	0.89505678	0.889570532	0.756788692	0.727943629	0.73586288	0.782264984	0.547793086	0.860493597	0.893324794	0.816949727	0.882602428	0.824824163	0.30708573	0.539116688	0.20786344	0.35625464	0.245495365	RUNX3_7	TSS1500
cg06377278	0.053178401	0.039687404	0.031583837	0.041953185	0.039795185	0.050706688	0.048675293	0.038411925	0.041899441	0.041770624	0.048247451	0.039994502	0.038934734	0.041967541	0.054694776	0.043544385	0.041591861	0.038682171	0.039672497	0.046336634	RUNX3_8	1stExon;Body;5'UTR
cg06640822	0.127696314	0.218584139	0.119761379	0.215511052	0.109220895	0.07768066	0.090858069	0.062195181	0.08810358	0.062348666	0.056378595	0.063183652	0.057271854	0.054330704	0.052579882	0.066200176	0.042821829	0.055666084	0.06144021	0.058363373	RUNX3_9	1stExon;5'UTR
cg07236781	0.926177479	0.953095431	0.917560049	0.936572751	0.942566191	0.86697716	0.856739458	0.623367273	0.744899652	0.5829486	0.396166517	0.406526859	0.372009652	0.450926902	0.478648153	0.307515613	0.286713287	0.330461724	0.173454348	0.227500417	RUNX3_10	1stExon
cg07801894	0.838581221	0.855975859	0.827681454	0.782792815	0.860980311	0.161013656	0.157652099	0.097117556	0.209273794	0.097059181	0.745454484	0.804974049	0.667497742	0.762827851	0.702229929	0.103714956	0.116276313	0.085056831	0.081275942	0.09227331	RUNX3_11	TSS1500
cg07996594	0.960463442	0.953119614	0.961721131	0.947656356	0.957607433	0.954833918	0.956477527	0.867724868	0.936788875	0.900037603	0.751701653	0.673498035	0.6475643	0.716132398	0.877009996	0.773871839	0.881020492	0.832891916	0.822307306	0.882345013	RUNX3_12	TSS1500;Body
cg09993145	0.069214324	0.080446769	0.053821656	0.077993255	0.078372666	0.067253069	0.072730341	0.062783661	0.077742586	0.052054346	0.068793468	0.072088725	0.059945964	0.061617807	0.058221595	0.069449255	0.064221706	0.059565876	0.045236573	0.060024429	RUNX3_13	TSS1500
cg10013501	0.816701654	0.811293137	0.823453191	0.816860465	0.841151793	0.882125201	0.804057066	0.81705924	0.814347431	0.837299357	0.826936579	0.819932951	0.827805001	0.816353502	0.815465095	0.821526535	0.837978781	0.821527527	0.815861706	0.834544233	RUNX3_14	TSS1500;Body
cg10993442	0.936161033	0.942353625	0.923483599	0.907886703	0.92018368	0.883155176	0.888147785	0.722853427	0.87933867	0.759375764	0.735497023	0.660313835	0.581057743	0.750115375	0.707433924	0.708100275	0.845376883	0.791883333	0.754244733	0.794194291	RUNX3_15	TSS1500;Body
cg11018723	0.029543515	0.041229455	0.029429286	0.041298936	0.026872247	0.044549266	0.033538753	0.036284777	0.039181115	0.032387543	0.038637087	0.034554775	0.036785714	0.042377756	0.031939062	0.052113961	0.027546384	0.038405797	0.037951943	0.032266425	RUNX3_16	Body;TSS200
cg11585280	0.768302886	0.829822135	0.778432089	0.788659844	0.755930246	0.577533043	0.544674057	0.489447543	0.625730632	0.441254538	0.770696172	0.778027924	0.725347849	0.772022337	0.689338161	0.246219532	0.412178466	0.221644016	0.298993632	0.24065476	RUNX3_17	TSS1500
cg12459932	0.899896325	0.922479139	0.900148358	0.908460385	0.93233921	0.390047544	0.464112726	0.232388263	0.480851283	0.341920844	0.826538988	0.869747436	0.760735502	0.862437511	0.785634929	0.093110795	0.172339817	0.089875435	0.128331688	0.113155336	RUNX3_18	TSS1500
cg13106389	0.882197472	0.870748101	0.830560714	0.848389351	0.842451903	0.795780508	0.746673412	0.632125434	0.741223699	0.64974015	0.738162441	0.669204838	0.621864748	0.711744963	0.729093632	0.680201096	0.762997321	0.678026361	0.684387196	0.684901546	RUNX3_19	TSS1500;Body
cg13305657	0.88161435	0.895794423	0.892124864	0.892495434	0.899679207	0.909115984	0.878834006	0.87893341	0.879205453	0.886778671	0.88298447	0.897553333	0.889488522	0.906636594	0.902139281	0.878597243	0.916844596	0.89144765	0.884057971	0.838430413	RUNX3_20	TSS1500;Body
cg13461622	0.147399002	0.229384125	0.11703619	0.257658596	0.11027068	0.084236971	0.07691907	0.056798009	0.108547209	0.129850654	0.064325828	0.062521037	0.061027258	0.052545993	0.05349773	0.069149812	0.072605038	0.05883537	0.050315088	0.061681418	RUNX3_21	1stExon;5'UTR
cg13629563	0.051708504	0.047940867	0.043678289	0.042276237	0.036735248	0.043384117	0.040571828	0.043648267	0.048505214	0.03707227	0.045331891	0.046100175	0.041051945	0.046190045	0.03884366	0.043736507	0.048109541	0.038658844	0.043988663	0.046475032	RUNX3_22	Body;TSS200
cg13898430	0.704823198	0.750476776	0.734974891	0.734459355	0.732637883	0.554821735	0.564484463	0.501932061	0.550416473	0.375503626	0.681092858	0.710747173	0.626887482	0.678681706	0.660587714	0.381122631	0.400115613	0.37886167	0.440849923	0.356937873	RUNX3_23	TSS1500
cg14425908	0.768344566	0.838087127	0.809023209	0.72821561	0.825242009	0.168809174	0.195761599	0.116034725	0.263099487	0.102835225	0.694424016	0.76410335	0.680161885	0.767471827	0.721789309	0.103676907	0.14510926	0.090295827	0.110973354	0.101094336	RUNX3_24	TSS1500
cg15014975	0.932008693	0.930989429	0.918774628	0.936890951	0.955712452	0.930867991	0.908956244	0.766739939	0.850619612	0.819407308	0.478928674	0.381542951	0.394997091	0.442882775	0.654691277	0.685243603	0.775020485	0.739966202	0.670228703	0.800159792	RUNX3_25	TSS1500;Body
cg16529592	0.904152963	0.912679517	0.904037784	0.91550666	0.909062881	0.513737326	0.459141047	0.440103237	0.586918457	0.288588853	0.816465799	0.885027715	0.743868277	0.871719546	0.781455896	0.2450435	0.353043965	0.204985515	0.297050019	0.212022199	RUNX3_26	TSS1500
cg18087266	0.809798683	0.823556988	0.807221272	0.780019112	0.768372363	0.897050585	0.875639772	0.846446706	0.839118242	0.789851582	0.703338617	0.639291696	0.636519312	0.698332175	0.682102367	0.834980435	0.862444764	0.837262461	0.800613572	0.860219026	RUNX3_27	TSS1500;Body
cg19270505	0.091812081	0.078648548	0.079757599	0.100483942	0.075747434	0.123654862	0.088096586	0.107029478	0.115755043	0.075431265	0.096692825	0.069461767	0.099897302	0.085811233	0.072858036	0.128571429	0.086692493	0.098894871	0.09929078	0.079903391	RUNX3_28	1stExon;Body;5'UTR
cg19774846	0.858833423	0.876609305	0.876226415	0.868463228	0.887713068	0.538052304	0.566536551	0.528270992	0.609800732	0.353985928	0.743877199	0.814403201	0.728800336	0.810657526	0.735851514	0.287131138	0.306717952	0.223483285	0.315121413	0.229762384	RUNX3_29	TSS1500
cg20695936	0.882673561	0.885728958	0.896984789	0.871476327	0.880173096	0.858322224	0.867844368	0.827757895	0.872893378	0.522936826	0.798091767	0.779459488	0.710606382	0.771763733	0.795401398	0.787620237	0.835575077	0.795608211	0.787680994	0.83368813	RUNX3_30	TSS1500;Body
cg21406271	0.94836025	0.939283519	0.97107175	0.960001615	0.973088139	0.97450262	0.960804486	0.948069218	0.954710156	0.953409737	0.967799458	0.963961992	0.972491676	0.960796094	0.973877013	0.962564216	0.969135199	0.962036649	0.970231026	0.96532889	RUNX3_31	TSS1500;Body
cg22153728	0.088069126	0.095900128	0.10056926	0.102195807	0.092407897	0.10265544	0.083376941	0.100694444	0.120523416	0.089760268	0.106187811	0.103421462	0.103602115	0.095940421	0.10373295	0.115131579	0.119638167	0.09857168	0.115440348	0.086713576	RUNX3_32	TSS200
cg22737001	0.038433569	0.049355793	0.044891934	0.052470868	0.0451536	0.058345792	0.057892843	0.042769769	0.054060056	0.040923564	0.049537194	0.058341592	0.053660388	0.048763413	0.047940656	0.055091713	0.048540221	0.045751129	0.048326724	0.046411346	RUNX3_33	TSS1500;Body
cg23916689	0.922292585	0.909330098	0.902899105	0.890581767	0.915880856	0.519496177	0.534033916	0.401042864	0.571350053	0.358040122	0.855277369	0.894166009	0.803138275	0.881702113	0.803241051	0.238356872	0.368900486	0.199791037	0.263298692	0.190907147	RUNX3_34	TSS1500
cg24006721	0.948467967	0.947121034	0.959870219	0.942679227	0.945711183	0.956452546	0.949386503	0.944602485	0.947408153	0.965601537	0.954557898	0.945614262	0.938209112	0.9497307	0.955653289	0.962782565	0.9591317	0.958056266	0.948613623	0.961380597	RUNX3_35	TSS1500;Body
cg24019564	0.762811632	0.766303225	0.689481311	0.69266821	0.720040638	0.511951638	0.445255167	0.361945481	0.505419988	0.364634735	0.432546579	0.346089705	0.339202066	0.427399865	0.467248432	0.446601484	0.491635597	0.342832172	0.390686135	0.347639482	RUNX3_36	TSS1500;Body
cg24463471	0.904847397	0.916757279	0.905220339	0.921736271	0.908623952	0.935736103	0.902718169	0.917477876	0.890647642	0.918331295	0.908778813	0.904840666	0.908406685	0.918384269	0.905019788	0.919468335	0.913516976	0.919536191	0.900368127	0.916902971	RUNX3_37	TSS1500;Body
cg24842859	0.628148501	0.682924936	0.550358536	0.568870378	0.610739534	0.585616089	0.50934183	0.370928693	0.554141911	0.353307449	0.453759011	0.432196931	0.370274884	0.462834074	0.41255999	0.468859105	0.483172801	0.43109353	0.382250766	0.381222344	RUNX3_38	TSS1500;Body
cg25470148	0.922149876	0.929275591	0.932708291	0.917205731	0.932150633	0.93848763	0.928980718	0.831699406	0.90371181	0.914680433	0.941486753	0.915448891	0.937856746	0.930222126	0.950008261	0.909353078	0.91875999	0.913389081	0.914886811	0.897407973	RUNX3_39	TSS1500;Body
cg25882256	0.889887858	0.900063481	0.891499012	0.888040157	0.893650794	0.90240667	0.885242113	0.877059953	0.893078031	0.879125	0.890926187	0.896971202	0.873429186	0.889871901	0.91055885	0.871199856	0.897749861	0.884870334	0.856712824	0.897903373	RUNX3_40	TSS1500;Body
cg26256263	0.929039476	0.917925387	0.914644351	0.922396857	0.916399401	0.918579126	0.919338508	0.909836066	0.917948718	0.920691009	0.885689046	0.913351781	0.929305457	0.922762057	0.91818542	0.906790233	0.899459243	0.923841647	0.92417244	0.885764888	RUNX3_41	TSS1500;Body
cg26421310	0.060657839	0.059551632	0.076435365	0.077030063	0.070623798	0.089380976	0.080516564	0.075716938	0.078290151	0.082339417	0.066055931	0.073886904	0.067251771	0.067904762	0.098539471	0.072815534	0.068087786	0.083766394	0.068042975	0.05278481	RUNX3_42	TSS1500;Body
cg26672794	0.209049255	0.178554332	0.161566707	0.172313215	0.178970066	0.174205708	0.162324187	0.170283615	0.20114689	0.14951558	0.194354206	0.185689766	0.193813571	0.168250487	0.157050453	0.183477189	0.15793094	0.194690265	0.179197995	0.16464891	RUNX3_43	TSS1500;Body
cg27058497	0.066005143	0.081136585	0.058856197	0.074118295	0.062364213	0.073572843	0.070921448	0.0735762	0.074031659	0.056985341	0.067356679	0.063393141	0.063789314	0.067664378	0.069467925	0.059267866	0.068407153	0.07225449	0.059275141	0.066193989	RUNX3_44	TSS200
TBX21
cg02731774	0.055732187	0.04713659	0.048066768	0.049813785	0.043967319	0.053251473	0.048991384	0.056287728	0.053312761	0.05757327	0.05270312	0.049867037	0.050772148	0.057147885	0.043812307	0.046444567	0.044580487	0.048002978	0.043309001	0.050383871	TBX21_1	1stExon;5'UTR
cg03396557	0.147068081	0.134582625	0.155400265	0.136147148	0.133565635	0.032111077	0.042114227	0.038655292	0.043828712	0.041888949	0.068526788	0.071987602	0.098893844	0.080782222	0.077967043	0.043931874	0.043557194	0.03808309	0.038750012	0.037489282	TBX21_2	TSS200
cg03639783	0.071873544	0.077545262	0.067049769	0.062024854	0.056247804	0.043079158	0.049762363	0.050306358	0.057201426	0.032540554	0.067856051	0.075902898	0.078393142	0.07025172	0.058980093	0.05641809	0.048858871	0.054780026	0.054637886	0.049633711	TBX21_3	1stExon
cg06927323	0.157503154	0.205108166	0.170923832	0.225507481	0.181997989	0.096305358	0.100280987	0.070617779	0.141706786	0.081954102	0.082117674	0.076363619	0.106657037	0.087247879	0.133038353	0.122167492	0.109915506	0.074604439	0.112752744	0.102109268	TBX21_4	TSS1500
cg06959103	0.1871147	0.14361092	0.15375689	0.151652242	0.217870439	0.043136884	0.040545305	0.039002933	0.045886766	0.043583227	0.082561308	0.081527038	0.097140539	0.083411195	0.07670804	0.051528622	0.039095137	0.036981456	0.046115288	0.040626884	TBX21_5	TSS200
cg08670136	0.474996213	0.593771377	0.540381913	0.493920034	0.460482986	0.071149994	0.075626796	0.064623466	0.06967666	0.06904304	0.398599605	0.45332584	0.423831064	0.438543772	0.360129531	0.077420396	0.062246746	0.061567438	0.064427716	0.065251558	TBX21_6	TSS1500
cg09775582	0.039011704	0.036322073	0.033487407	0.044086114	0.028958907	0.034313271	0.044287376	0.042825645	0.046330163	0.032490618	0.035410648	0.035811569	0.026890756	0.034699779	0.03002681	0.04587156	0.042070877	0.032559813	0.037037037	0.037063692	TBX21_7	1stExon
cg11090676	0.084276239	0.096350034	0.076875156	0.076720448	0.081855753	0.089705675	0.096952596	0.076774259	0.106994499	0.075979422	0.084391505	0.075886889	0.081969116	0.085132704	0.070573761	0.083187697	0.084674864	0.08045584	0.08686123	0.091271324	TBX21_8	TSS200
cg15715716	0.155092075	0.164784547	0.155860115	0.155683022	0.131192859	0.06456175	0.07552345	0.060081141	0.075136775	0.057872441	0.128485702	0.124474463	0.131911215	0.149834751	0.128005646	0.074689824	0.079107348	0.075725384	0.072876364	0.068901841	TBX21_9	TSS1500
cg19172222	0.291623846	0.272900677	0.278468807	0.248343356	0.25646303	0.050111526	0.050085661	0.048061598	0.07435253	0.05217257	0.150444248	0.183045688	0.169681045	0.1711859	0.238063946	0.074818144	0.054665319	0.053293242	0.055229588	0.06332238	TBX21_10	TSS200
cg20568196	0.085613103	0.08014554	0.115556383	0.08970488	0.079564969	0.079316344	0.087554061	0.081906315	0.084372917	0.075286757	0.078481013	0.094423537	0.084628328	0.073453729	0.091878022	0.085314263	0.076152305	0.082459818	0.086284242	0.097138251	TBX21_11	1stExon
cg26281453	0.05224442	0.054674686	0.052070393	0.063683624	0.049304825	0.066456631	0.069142964	0.047877228	0.062177548	0.056359482	0.065360657	0.061483916	0.06481665	0.054201797	0.033113299	0.058806737	0.054615706	0.052808773	0.061576609	0.044885379	TBX21_12	1stExon;5'UTR
cg26607785	0.237249459	0.254496611	0.235252271	0.2167586	0.213900274	0.071239168	0.076085101	0.067879022	0.077464151	0.07403368	0.150753001	0.14164812	0.155888616	0.170778994	0.153099201	0.085565939	0.080629104	0.074466425	0.072538049	0.073079435	TBX21_13	TSS200
ZBTB7B
cg00694357	0.068964127	0.06823749	0.067101537	0.067397072	0.075851482	0.075822503	0.063989641	0.069046107	0.066137461	0.062712945	0.085059085	0.091650125	0.083927737	0.092071392	0.077174387	0.072899523	0.062372776	0.062228604	0.080415821	0.06411487	ZBTB7B_1	5'UTR
cg01782486	0.137480538	0.15753453	0.125925502	0.128763432	0.12857424	0.903777823	0.70973134	0.916661025	0.630589054	0.76284716	0.914094027	0.935212362	0.921018463	0.937043379	0.926606338	0.950612066	0.96438307	0.935469472	0.944604441	0.951494553	ZBTB7B_2	5'UTR
cg03315562	0.05063951	0.050269025	0.047999366	0.057156932	0.046816143	0.053873324	0.044145573	0.04921467	0.050462707	0.045164643	0.058549885	0.051817263	0.056436105	0.055402488	0.057357071	0.052473689	0.053165621	0.049193	0.051814174	0.049442834	ZBTB7B_3	5'UTR
cg04432617	0.081886161	0.07140338	0.06946117	0.071276804	0.068598342	0.076477832	0.079412152	0.067489572	0.090127245	0.061865678	0.086928336	0.076314409	0.071718369	0.066527485	0.063664778	0.086215464	0.0828984	0.060089841	0.076206068	0.063099573	ZBTB7B_4	5'UTR
cg04868262	0.051736815	0.051693353	0.054870165	0.054755477	0.045754019	0.041944256	0.056578925	0.057853695	0.056645711	0.047621031	0.060811972	0.055406461	0.053026572	0.061595595	0.053473952	0.056972404	0.051713267	0.059136102	0.058785538	0.0462412	ZBTB7B_5	TSS1500
cg06649639	0.638096518	0.739549712	0.68281474	0.654284711	0.680018944	0.696776293	0.561512605	0.757916843	0.66435079	0.665140862	0.858450381	0.857217143	0.839522441	0.865668694	0.885454003	0.862492319	0.872344053	0.857931141	0.843403359	0.845460752	ZBTB7B_6	5'UTR
cg07238657	0.062223007	0.06176131	0.05777342	0.066138011	0.05279529	0.056707218	0.061125477	0.057002575	0.073625284	0.055248745	0.075938074	0.061775572	0.056916659	0.059162109	0.061198114	0.070875932	0.072746865	0.058850857	0.064327075	0.055060015	ZBTB7B_7	TSS1500
cg09791324	0.166022868	0.141897339	0.133106447	0.153087443	0.131042254	0.125253844	0.144793793	0.147650497	0.161316872	0.155698925	0.163275913	0.142914573	0.175071682	0.161281582	0.198520573	0.159277144	0.153417015	0.144819537	0.165591398	0.145658263	ZBTB7B_8	TSS1500
cg09958801	0.049450249	0.044505874	0.037882742	0.049154265	0.045504988	0.0403866	0.04664339	0.043976683	0.049552589	0.040946935	0.095954883	0.106638816	0.083847122	0.086755216	0.081279013	0.062824476	0.043409104	0.048590357	0.062285492	0.041823068	ZBTB7B_9	TSS200
cg11267415	0.0577997	0.055638573	0.053998978	0.051238156	0.055355431	0.055612858	0.061978668	0.049350353	0.059865888	0.051539929	0.066216321	0.058825788	0.056408862	0.064074839	0.056570326	0.054295849	0.062879689	0.051453299	0.0611944	0.055437236	ZBTB7B_10	5'UTR
cg11715725	0.213756443	0.17137444	0.163386243	0.183054063	0.195101351	0.170297821	0.166606693	0.166531143	0.188196946	0.189364958	0.179355524	0.162776413	0.163325472	0.196735106	0.157387111	0.171952337	0.186025612	0.191336406	0.183318545	0.143432407	ZBTB7B_11	TSS1500
cg12450040	0.04998438	0.039194099	0.030478955	0.037829879	0.035835945	0.040692641	0.049557522	0.057445681	0.050337367	0.032181614	0.042023748	0.051140664	0.031409958	0.03684771	0.030555225	0.050988669	0.039197387	0.035560589	0.04644967	0.039017341	ZBTB7B_12	5'UTR
cg15065069	0.042246015	0.030446756	0.033227933	0.043244083	0.036734948	0.037225684	0.03639532	0.041821609	0.045208655	0.035130435	0.041959057	0.044852977	0.035873465	0.044016364	0.044858641	0.035748452	0.038599408	0.033918129	0.032660703	0.046447003	ZBTB7B_13	TSS1500
cg16618493	0.712925325	0.73790558	0.724388928	0.755608713	0.683406397	0.356241236	0.382388714	0.246776451	0.346164928	0.208959471	0.843562311	0.867417022	0.800575589	0.85802688	0.826362115	0.514191987	0.672045925	0.556774844	0.508240404	0.367220368	ZBTB7B_14	5'UTR
cg17329534	0.144500706	0.170317627	0.120505578	0.154378633	0.102331473	0.13215736	0.091716807	0.105031853	0.082953454	0.067760772	0.87906447	0.896242	0.812745468	0.886696495	0.817518144	0.317403985	0.410733882	0.321794543	0.272025799	0.198472468	ZBTB7B_15	5'UTR
cg17588293	0.083910579	0.09631728	0.090419606	0.085019582	0.071293673	0.119245796	0.106625788	0.097358881	0.094147207	0.09944629	0.131079137	0.103917989	0.120250959	0.107929198	0.138341391	0.160052144	0.160118031	0.154143938	0.119828581	0.109484778	ZBTB7B_16	5'UTR
cg19099983	0.116905845	0.09605182	0.091166777	0.091205019	0.086087459	0.090939642	0.102661364	0.099512616	0.118790622	0.078233484	0.136680038	0.12964527	0.117849251	0.113735239	0.109358639	0.124311665	0.108802418	0.12808959	0.139385948	0.08346029	ZBTB7B_17	5'UTR
cg22505006	0.053593973	0.063911513	0.058456513	0.060605569	0.048684371	0.350273293	0.198386292	0.399588873	0.166633868	0.239685291	0.945755013	0.928395329	0.941955789	0.93474387	0.937077533	0.879996734	0.91927703	0.890485141	0.887050267	0.85028189	ZBTB7B_18	5'UTR
cg23237634	0.045941492	0.033834586	0.028312834	0.040652151	0.028828594	0.035504082	0.039469283	0.034590246	0.043955095	0.039845261	0.054635446	0.043186583	0.051899593	0.051254715	0.052875809	0.045777498	0.036614998	0.041961083	0.04038211	0.036197917	ZBTB7B_19	5'UTR
cg24435866	0.237990767	0.191951731	0.186849468	0.18831778	0.146976132	0.188847949	0.194041401	0.184848936	0.228667867	0.165348233	0.209753368	0.191427771	0.215413804	0.20020564	0.196689024	0.233395141	0.22391896	0.182377622	0.200264174	0.170855837	ZBTB7B_20	5'UTR
cg24955196	0.081254104	0.086734694	0.076552256	0.088410776	0.069695528	0.412436352	0.366439417	0.540640902	0.319956616	0.393086965	0.826049822	0.815604616	0.818450427	0.84455276	0.803911205	0.84302935	0.839878419	0.834624897	0.826861581	0.827290448	ZBTB7B_21	5'UTR
