# Supplementary material for: The transcription factors Runx3 and ThPOK cross-regulate acquisition of cytotoxic function by human Th1 lymphocytes
Source: eLife journal article supplement (doi:10.7554/elife.30496), 2018-02-28
Supplement: supp [file elife-30496-supp-v1.zip › elife_poa_e30496_Figure_3_figure_supplement_1.pdf]

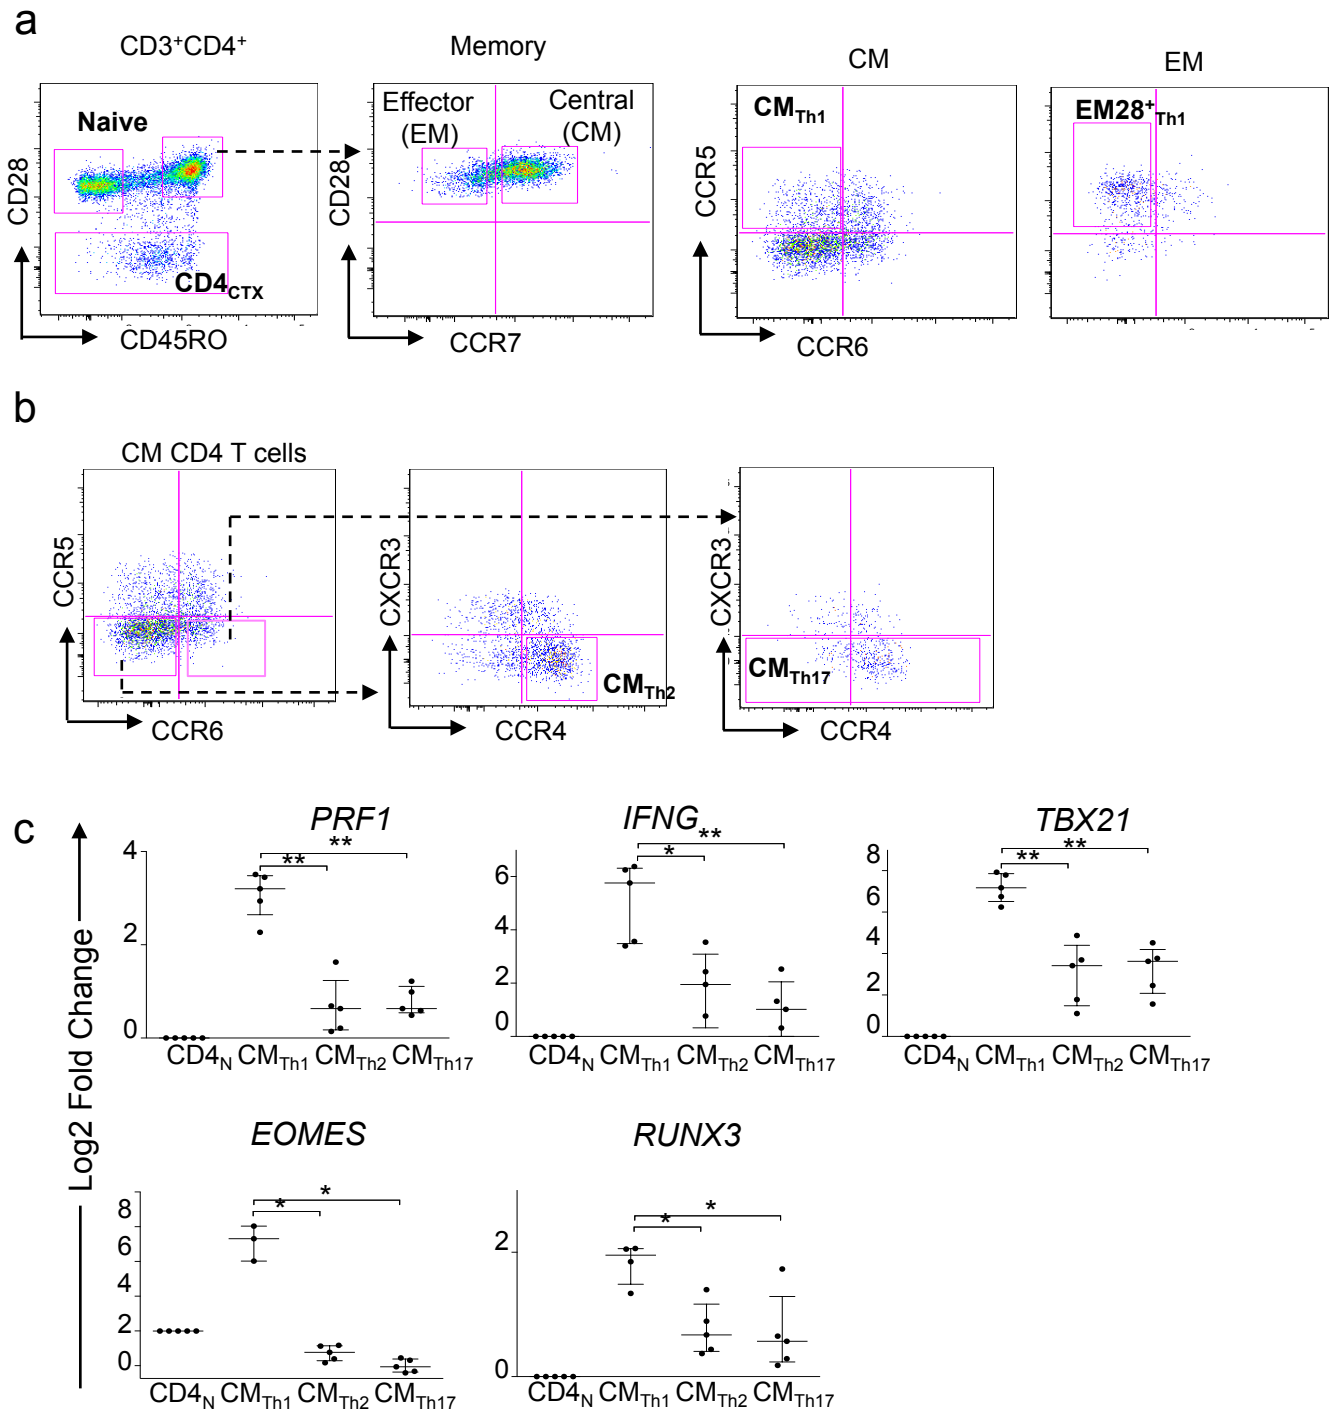

**Figure 3-figure supplement 1. Sorting strategy of memory CD4 T cell subsets and expression of candidate genes.** **a)** Sorting strategy of naive (CD3<sup>+</sup>CD4<sup>+</sup>CD45RO<sup>-</sup>CD28<sup>+</sup>), central memory Th1 (CM<sub>Th1</sub>) (CD3<sup>+</sup>CD4<sup>+</sup>CD45RO<sup>+</sup>CD28<sup>+</sup>CCR7<sup>+</sup>CCR5<sup>+</sup>CCR6<sup>-</sup>), CD28<sup>+</sup> effector memory Th1 (EM28<sup>+</sup><sub>Th1</sub>) (CD3<sup>+</sup>CD4<sup>+</sup>CD45RO<sup>+</sup>CD28<sup>+</sup>CCR7<sup>+</sup>CCR5<sup>+</sup>CCR6<sup>-</sup>) and CD4<sub>CTX</sub> (CD3<sup>+</sup>CD4<sup>+</sup>CD28<sup>-</sup>) T cells. **b)** Sorting strategy of CM<sub>Th2</sub> (CD3<sup>+</sup>CD4<sup>+</sup>CD45RO<sup>+</sup>CD28<sup>+</sup>CCR7<sup>+</sup>CCR4<sup>+</sup>CCR6<sup>-</sup>CCR5<sup>-</sup>CXCR3<sup>-</sup>) and CM<sub>Th17</sub> (CD3<sup>+</sup>CD4<sup>+</sup>CD45RO<sup>+</sup>CD28<sup>+</sup>CCR7<sup>+</sup>CCR6<sup>+</sup>CCR5<sup>-</sup>CXCR3<sup>-</sup>) cells. **c)** The expression of candidate gene mRNA was measured by qPCR in purified T cell subsets from 3-5 donors. Data are median +/- interquartile range of log2 fold change as compared to naive CD4 (CD4<sub>N</sub>) T cells. \*:p<0.05 and \*\*:p<0.01. CM<sub>Th1</sub> cells expressed higher levels of *PRF1*, *IFNG*, *TBX21*, *EOMES* and *RUNX3* than the other CM subsets.
