# Supplementary material for: The transcription factors Runx3 and ThPOK cross-regulate acquisition of cytotoxic function by human Th1 lymphocytes
Source: eLife journal article supplement (doi:10.7554/elife.30496), 2018-02-28
Supplement: supp [file elife-30496-supp-v1.zip › elife_poa_e30496_Figure_3_source_data_1.xlsx]

## Sheet: Figure 3
Figure 3-source data 1. Differentiation of CD4CTX T cells within the Th1 lineage.
Figure 3c. Expression of perforin measured by flow cytometry in indicated population. MFI
CD4N	CMTh1	EM28+Th1	CD28-
44.6	13.7	29.1	2917
173	168	213	1812
63.2	11.2	78.2	1438
77.9	42.6	99.6	662
34.7	0.273	48.6	1533
87.1	38.9	69.6	1207
389	371	620	1497
502	311	522	2901
Figure 3d. mRNA expression of indicated gene measured by qPCR. Log2 Fold Change.
PRF1					IFNG
Naive	CMTh1	EM28+Th1	CD4CTX		Naive	CMTh1	EM28+Th1	CD4CTX
1	8.4	16.68	109.9		1	112.21	101.83	144.01
1	4.53	20.68	186.11		1	68.12	60.97	102.54
1	3.43	11.16	58.08		1	64.89	122.79	176.07
1	12.64	28.44	132.51		1	107.63	159.79	352.14
TBX21					RUNX3					EOMES
Naive	CMTh1	EM28+Th1	CD4CTX		Naive	CMTh1	EM28+Th1	CD4CTX		Naive	CMTh1	EM28+Th1	CD4CTX
1	71.01	98.36	464.65		1		6.1	11		1	94.35	116.97	194.01
1	51.63	130.69	826		1		5	8.8		1	42.22	145.01	125.37
1	59.3	86.22	724.08		1	1.9	2.1	5.7		1	41.36	160.9	243.88
1	87.43	149.09	724.08		1		3.9	12.5		1	37.79	43.41	72
					1	3.6	5.8
Fig 3f. Normalized enrichement.
H3K4Me3
	b TSS			c -1,3 kb			d -5,5 kb			e -7,7 kb			a 3'UTR
Naive	7.82915	42.3373	12.5434	1.19653	19.0782	8.71715	0.418662	3.58968	5.69169	0.701666	3.32616	5.38466	0.307542	12.3707	3.61465
CMTh1	16.9576	34.5079	17.3139	3.74212	6.74518	8.27556	3.41967		4.40413	2.82619	2.96669	4.73661	2.59162	1.20904	11.2656
EM28+Th1	34.8686	34.9896	21.7638	3.25771	6.81567	4.62309	0.387927	0.866851		0.684848	2.07607	8.47878	0.786684	2.16423	2.70168
CD4CTX	96.5936	153.156	62.2006	4.1092	14.161	10.3665	1.08964	4.32847	3.55255	1.47822	9.31048	5.12964	0.894316		11.7034
H3K27ac
	d TSS			c -1,3 kb			b -5,5 kb			a -7,7 kb			e +13,6 kb
Naive	31.3166	81.5072	4.78612	16.3799	40.3321	13.2586	6.20683	8.27556	10.4386	5.38466	1.10465	7.45835	5.49781	10.5112	6.07909
CMTh1	54.9046	77.9165	15.2301	32.3088	46.8136	17.6777	8.33312	25.2613	18.621	8.77778	31.5344	17.8006	9.15054	31.3166	9.94421
EM28+Th1	36.4755	55.8644	17.1943	14.6604	32.5335	8.50821	4.51228	8.71715	23.4881	7.35567	11.7034	18.4923	1.418	7.33022	21.3899
CD4CTX	127.015	145.397	14.8651	69.7372	73.9694	8.65693	25.7029	17.8006	20.2361	45.376	60.2904	12.807	8.16162	12.8514	13.3508
