# Supplementary material for: The transcription factors Runx3 and ThPOK cross-regulate acquisition of cytotoxic function by human Th1 lymphocytes
Source: eLife journal article supplement (doi:10.7554/elife.30496), 2018-02-28
Supplement: supp [file elife-30496-supp-v1.zip › elife_poa_e30496_Figure_4_source_data_1.xlsx]

## Sheet: Figure 4
Figure 4-source data 1. Proportion of PRF1 mRNA+ cells and co-expression with transcription factors in the Th1 lineage.
Figure 4. Single cell expression values for each indicated genes (column) and each cell (lines)
ImpWiz	RORC	STAT6	CD3epsilon	b2m	CCL22	CYLD	GARP	ID3	IL10	IL5	IL9	myc	NR4A1	p27	PMEPA1	Sox4	TGFB2	EOMES*	IL12 p35	IL27EBI3	IFNG	SSP1	TNFa	TRAF6	TSP1	vimentin	CCL2	CCL4	CXCL11	CXCL10	STAT1	STAT3	STAT4	TRAIL	CXCL9	IRF1	IRF3	IRF4	IRF7	TGFB	IL13	IL1B	IL2	IL21	IL4	IL6	BCL6	EF1	GATA3
CM_A03	0	0	0	0	0	0	0	0	0	0	0	0	0	25.0934	0	0	0	0	0	0	21.1465	0	0	0	0	23.4245	0	0	0	0	20.2107	0	0	0	0	23.9631	22.2078	0	20.5049	21.9537	0	0	22.6058	0	0	0	0	28.1962	0
CM_A06	0	0	16.7047	0	0	23.0444	0	0	0	0	0	18.0078	17.2098	24.6163	0	0	0	0	23.1661	0	21.6775	0	0	22.3931	0	25.2732	0	0	0	0	20.5479	0	0	22.3651	0	23.7892	17.8297	0	0	23.3701	0	0	0	0	0	0	0	27.3259	0
CM_A07	0	21.0401	17.4009	0	0	22.305	0	0	0	0	0	16.6127	0	23.6683	0	0	0	24.6561	0	0	21.6442	0	0	22.0837	0	24.0453	0	0	0	0	0	0	22.967	0	0	0	20.0034	0	0	20.9342	0	0	0	0	0	0	0	27.4758	22.5008
CM_A09	0	20.3594	16.1608	0	0	0	0	0	0	0	0	0	0	0	0	0	0	0	0	0	0	0	0	0	0	22.9298	0	0	0	0	0	0	0	0	0	0	21.6536	0	0	22.9745	0	0	22.2671	0	0	0	0	27.1139	0
CM_B01	0	20.0758	16.1319	0	0	21.8002	0	0	0	0	0	0	0	22.8817	0	0	19.1639	0	0	0	21.6599	0	0	0	0	24.1352	0	0	0	0	21.6432	19.7852	0	0	0	0	0	0	0	21.9277	0	0	21.7599	0	0	0	0	27.0704	0
CM_B02	0	0	0	0	0	18.5327	0	0	0	0	0	0	0	0	0	22.5702	0	0	22.7719	0	20.1914	0	0	22.4524	0	24.3434	0	0	0	0	0	21.3625	0	0	0	0	0	0	0	20.9949	0	21.114	21.5276	0	0	0	0	24.7992	22.7631
CM_B06	0	0	16.228	0	0	22.694	0	0	0	0	0	0	16.0085	17.9922	0	0	0	0	0	0	0	0	0	0	0	22.787	0	0	0	0	22.9199	0	0	0	0	24.3107	0	20.4561	0	22.7514	0	0	0	0	0	0	0	26.8903	22.833
CM_B07	0	0	18.1534	0	0	23.2239	0	0	0	0	0	0	0	25.905	0	23.8555	0	0	0	0	0	0	0	0	0	26.5268	0	0	0	0	0	24.1312	0	0	0	0	0	0	0	22.8929	0	0	24.3953	0	0	0	0	27.9565	25.2854
CM_B08	0	21.0157	17.0686	0	0	0	0	0	19.9181	0	0	0	0	0	0	0	0	21.3217	21.1141	0	0	0	0	0	0	17.0396	0	0	0	0	19.6332	0	0	0	0	22.2303	0	0	0	0	0	0	0	0	0	0	0	25.507	0
CM_B12	0	0	18.6697	0	0	23.3353	0	0	0	0	0	0	0	23.7264	0	0	0	0	23.0465	0	0	0	20.5707	22.8965	0	24.1426	0	0	0	0	0	22.4292	22.6823	0	0	21.9563	0	0	0	22.9337	0	0	0	0	0	0	0	27.5139	0
CM_C01	0	0	15.6937	0	0	0	0	0	0	0	0	0	0	0	0	0	0	22.0233	22.2074	0	0	0	0	0	0	22.1215	0	0	0	0	0	0	0	0	0	22.2073	21.2632	0	0	0	0	0	21.3226	20.6728	0	0	0	26.9237	0
CM_C02	0	0	16.4594	0	0	0	0	0	0	0	0	0	0	23.1116	0	17.2417	0	0	17.2782	0	0	0	0	0	0	24.6996	0	0	0	0	0	0	0	0	0	0	0	0	0	21.8103	0	0	0	0	0	0	0	27.2098	23.9507
CM_C03	0	20.6424	0	0	0	22.0026	17.9994	0	0	0	0	0	0	24.7992	0	0	21.776	0	23.4344	0	0	0	0	0	0	22.8094	0	0	0	0	0	0	0	0	0	22.2617	0	0	0	21.446	0	0	0	0	0	0	0	28.0136	0
CM_C05	0	0	18.3444	0	0	23.2511	0	0	0	0	0	0	0	24.609	0	0	0	0	20.6482	0	0	0	0	0	0	23.4983	0	0	0	0	0	0	0	0	0	0	0	0	0	21.0856	0	0	0	0	0	0	0	28.0486	0
CM_C07	0	0	15.8057	0	0	22.296	0	0	0	0	0	14.3479	0	22.9	0	0	0	0	0	0	0	0	0	23.2851	0	26.0628	0	0	0	0	21.4584	0	0	0	0	25.1096	0	0	20.2277	23.0817	0	0	22.0158	0	0	23.6564	0	26.6322	0
CM_C08	0	0	16.1192	0	0	0	0	0	0	0	0	0	0	22.5133	0	23.4766	0	0	24.322	0	0	0	0	0	0	25.0679	0	0	0	0	15.1313	25.2721	0	0	0	0	0	0	0	0	0	0	0	0	0	0	0	27.8434	0
CM_C11	0	0	16.2593	0	0	0	0	0	0	0	0	0	0	21.3211	0	0	0	0	0	0	0	0	0	0	0	26.7747	0	0	0	0	18.5381	0	23.4143	0	0	0	0	0	0	0	0	0	0	0	0	0	0	28.563	22.3648
CM_D01	0	16.5848	17.609	0	0	0	18.3558	0	0	0	0	0	0	24.6698	0	0	22.1697	0	0	0	0	0	0	0	0	26.3399	0	0	0	0	0	0	0	0	0	0	0	0	0	21.9579	0	19.3264	23.2129	0	0	0	0	28.2227	0
CM_D02	0	22.1665	16.3109	0	0	24.3753	0	0	0	0	0	19.5947	0	24.53	0	0	0	0	0	0	0	0	0	21.0798	0	24.2558	0	0	0	0	19.9246	0	0	0	0	22.6908	0	0	0	0	0	0	23.6892	0	0	0	0	28.2439	24.5172
CM_D06	0	0	0	0	0	22.0872	20.132	0	0	0	0	21.4251	0	23.6303	0	0	0	0	23.5661	0	0	0	0	22.7099	0	25.4292	0	0	0	0	0	22.5727	0	0	0	0	0	0	0	0	0	19.3299	0	0	0	0	0	28.0405	0
CM_D07	0	0	17.543	0	0	22.8601	0	0	0	0	0	18.95	0	22.1509	0	0	0	0	0	0	0	0	0	0	0	24.7074	0	20.7219	0	0	0	0	22.9225	0	0	0	0	0	0	22.7943	0	18.1387	0	0	0	0	0	27.4456	0
CM_D09	0	0	18.1557	0	0	22.634	18.1768	0	0	0	0	0	0	23.5733	0	21.8823	0	22.7515	23.008	0	0	0	0	19.5165	0	25.4391	0	0	0	0	20.0683	22.7114	0	23.2567	0	0	22.0899	0	0	23.2472	0	22.6858	0	0	0	0	0	27.4672	0
CM_D10	0	0	0	0	0	22.3419	0	0	0	0	0	0	0	22.1162	0	21.5315	20.083	19.0052	23.5012	0	0	0	0	16.8331	0	24.1097	0	0	0	0	0	19.5823	0	19.3177	0	0	20.5237	0	0	23.2231	0	0	0	0	0	0	0	26.5084	0
CM_D11	0	0	17.6584	0	0	23.1343	0	0	21.8216	0	0	0	17.6194	23.9712	0	0	0	0	23.368	0	20.9963	0	0	0	0	23.9831	0	0	0	0	0	24.0178	23.8551	0	0	22.3997	0	0	0	0	0	0	23.4291	0	0	0	0	28.1259	0
CM_D12	0	0	17.1221	0	0	22.6208	0	0	0	0	0	0	0	24.2675	0	0	0	0	0	0	0	0	0	0	0	23.5181	0	0	0	0	0	22.9701	0	0	0	0	17.6916	0	0	0	0	0	0	0	0	0	0	27.2503	22.4621
CM_E02	0	0	17.9904	0	0	16.189	0	0	0	0	0	0	0	24.1353	0	18.2831	0	0	23.192	0	0	0	0	22.6841	0	26.8267	0	0	0	0	21.1801	0	23.5761	21.052	0	24.132	22.0961	0	0	19.8733	0	0	0	0	0	0	0	27.7886	0
CM_E03	0	0	16.1176	0	0	0	0	0	0	0	0	0	0	0	0	0	0	0	0	0	0	0	0	0	0	21.7394	0	0	0	0	0	0	0	0	0	0	21.3637	0	0	0	0	20.0773	0	0	0	20.5718	0	27.4684	23.5176
CM_E04	0	0	17.1381	0	0	18.5917	0	0	0	0	0	0	0	24.0996	0	23.6378	0	0	24.5093	0	0	0	0	0	0	24.6528	0	0	0	0	19.5655	0	0	0	0	0	0	23.828	0	21.3251	0	0	0	0	0	0	0	28.753	0
CM_E09	0	0	18.5754	0	0	21.2205	0	0	0	0	0	0	0	24.7418	0	24.2215	0	23.5334	0	0	0	0	0	0	0	25.3485	0	0	0	0	0	0	0	0	0	0	0	0	0	24.1238	0	0	24.5682	0	0	0	0	27.2481	23.3053
CM_E11	0	0	15.7215	0	0	23.5918	0	0	0	0	0	0	19.1543	24.5521	0	0	0	0	23.8526	0	0	0	0	0	0	25.8741	0	0	0	0	17.9655	23.3256	0	0	0	0	23.2911	0	0	21.1346	0	25.522	0	0	0	0	0	29.1801	0
CM_F03	0	0	17.325	0	0	0	0	0	0	0	0	0	0	25.0731	0	0	0	0	25.2418	0	0	0	0	0	0	23.8155	0	0	0	0	17.4265	0	0	0	0	0	0	0	20.62	0	0	21.1025	0	0	0	0	0	27.6983	0
CM_F06	0	19.1171	18.4254	0	0	21.1918	0	0	0	0	0	0	0	23.8992	0	0	17.0875	0	0	0	0	0	0	0	0	22.8638	0	0	0	0	19.3918	0	0	0	0	0	0	0	0	21.7048	22.2911	0	0	0	0	0	0	27.4888	0
CM_F08	0	19.8364	16.2989	0	0	0	0	0	0	0	0	0	0	0	0	0	0	0	0	0	0	0	0	0	0	23.3441	0	0	0	0	0	0	0	0	0	0	0	0	0	0	0	21.7571	0	0	0	0	0	27.2707	0
CM_F10	0	0	18.2985	0	0	21.2762	0	0	0	0	0	0	0	24.2872	0	0	0	0	0	0	0	0	0	0	0	27.0444	0	0	0	0	0	0	0	0	0	0	23.5954	22.3467	0	23.04	0	0	0	0	0	0	0	28.3296	24.2325
CM_G03	0	0	0	0	0	22.5266	0	0	0	0	0	0	0	24.1791	0	17.6717	0	0	21.0445	0	21.4534	0	0	22.1849	0	24.7293	0	0	0	0	0	24.128	0	0	0	0	17.6503	22.0871	0	23.2209	0	0	0	0	0	0	0	27.6897	0
CM_G04	0	0	17.0452	0	0	22.6811	0	0	0	0	0	0	0	17.051	0	22.1471	20.9137	22.0487	18.0043	0	0	0	0	0	0	24.5739	0	0	0	0	0	17.5159	0	0	0	0	0	0	0	16.7567	0	0	22.8783	0	0	0	0	26.9092	0
CM_G05	0	0	0	0	0	0	0	0	0	0	0	0	0	22.4205	0	22.0562	0	0	23.8497	0	0	0	0	0	0	24.9279	0	0	0	0	21.1094	23.8823	0	0	0	0	22.0514	0	0	22.5869	0	19.3386	0	0	0	0	0	27.7115	25.6179
CM_G07	0	0	0	0	0	22.2093	0	0	0	0	0	23.2435	0	0	0	0	0	0	23.922	0	0	0	0	0	0	24.4305	0	0	0	0	0	0	0	0	0	23.0975	22.0179	0	0	22.3721	0	0	0	0	0	0	0	27.5092	0
CM_G09	0	0	0	0	0	0	0	0	0	0	0	0	0	19.0874	0	0	0	0	24.6567	0	0	0	0	0	0	25.3838	0	0	0	0	0	0	0	0	0	0	0	0	0	0	0	0	20.4736	0	0	0	0	26.9917	0
CM_G11	0	0	0	0	0	0	0	0	0	0	0	0	0	0	0	0	0	0	0	0	0	0	0	0	0	0	0	0	0	0	0	0	0	0	0	0	0	0	0	0	0	0	0	0	0	0	0	0	0
CM_G12	0	0	17.5082	0	0	0	0	0	0	0	0	0	0	22.7703	0	23.4876	0	22.0337	0	0	0	0	0	0	0	25.2632	0	0	0	0	0	0	0	0	0	0	0	0	0	0	0	23.6776	0	0	0	0	0	28.0209	0
CM_H01	0	0	14.9	0	0	0	0	0	0	0	0	0	16.7898	20.4128	0	0	0	0	0	0	0	0	23.6278	0	0	22.2588	0	0	0	0	15.7702	23.5103	0	0	0	0	0	0	0	0	0	0	0	0	0	0	0	26.5497	0
CM_H03	0	0	0	0	0	0	0	0	0	0	0	0	17.7907	24.1923	0	0	17.5308	0	24.167	0	0	0	0	0	0	25.0309	0	0	0	0	0	0	0	0	0	0	22.5749	0	0	0	0	0	0	0	0	0	0	28.8244	0
RT_CTL	0	0	0	0	0	0	0	0	0	0	0	0	17.1542	0	0	23.0865	0	0	23.5143	0	0	0	0	0	0	0	0	0	0	0	0	0	0	0	0	0	0	0	0	0	0	0	0	0	0	0	0	0	0
RT_CTL	0	0	0	0	0	21.3045	0	0	0	0	0	0	0	0	0	0	0	0	24.5977	0	0	0	0	0	0	0	0	0	0	0	0	0	0	0	0	0	0	0	0	0	0	18.8203	21.6296	0	0	0	0	22.5001	0
EM_A02	0	19.1874	16.6953	0	0	17.5691	0	0	0	0	0	0	0	0	0	0	21.6648	21.9126	24.783	0	0	0	0	0	0	0	0	21.9024	0	0	0	23.6767	0	0	0	0	22.5179	0	0	21.3735	0	0	0	0	0	0	0	26.4496	0
EM_A03	0	0	17.3531	0	0	21.8141	0	0	0	0	0	0	0	0	0	0	20.447	0	0	0	0	0	0	0	0	25.9343	0	0	0	0	20.2137	0	22.4977	0	0	22.3308	0	0	0	22.4148	0	0	22.9268	0	0	0	0	26.8242	22.5512
EM_B01	0	0	14.8275	0	0	0	0	0	0	0	0	0	0	22.4609	0	15.8765	0	0	23.0445	0	0	0	0	0	0	17.7643	0	0	0	0	17.4851	25.1046	22.0883	0	0	23.6996	0	0	0	0	0	0	0	0	0	0	0	27.303	16.0389
EM_B08	0	0	16.0308	0	0	0	0	0	0	0	0	0	0	14.2078	0	0	0	0	0	0	23.3721	0	0	0	0	25.0146	0	0	0	0	0	26.0979	0	0	0	0	0	0	0	0	0	0	22.7701	0	0	22.343	0	27.8911	24.1962
EM_B09	0	0	0	0	0	0	0	0	0	0	0	0	0	0	0	0	0	0	15.0519	0	0	0	0	0	0	0	0	0	0	0	0	0	0	0	0	0	0	0	0	0	0	22.1365	0	0	0	0	0	0	0
EM_B10	0	0	17.0354	0	0	0	0	0	0	0	0	0	0	21.966	0	0	0	0	0	0	0	0	0	0	0	24.0068	0	0	0	0	16.3877	0	0	0	0	20.2324	21.0947	0	0	23.437	0	0	0	0	0	21.1471	0	28.248	23.6254
EM_B11	0	0	16.9167	0	0	0	0	0	0	0	0	0	0	0	0	21.2361	0	0	23.6599	0	23.4983	0	0	0	0	24.3069	0	23.1203	0	0	0	0	0	0	0	0	22.8489	0	0	23.331	0	0	0	0	0	0	0	26.7537	0
EM_C01	0	0	15.8768	0	0	0	0	0	0	0	0	0	0	0	0	0	0	18.7824	0	0	0	0	0	0	0	22.2951	0	0	0	0	0	24.9852	0	0	0	21.3759	0	0	0	0	0	0	0	0	0	0	0	26.9323	0
EM_C04	0	0	18.5463	0	0	0	0	0	0	0	0	0	0	22.5948	0	0	0	25.6115	23.6451	0	0	0	0	0	0	23.7028	0	0	0	0	20.4755	0	0	0	0	24.7953	23.2721	0	0	20.9933	0	0	22.5607	0	0	0	0	26.8068	0
EM_C06	0	13.4939	17.0594	0	0	22.4548	0	0	0	0	0	0	0	22.4099	0	23.1289	0	0	0	0	0	0	0	0	0	26.1639	0	0	0	0	0	0	0	0	0	14.8054	0	0	0	23.4828	0	22.406	0	0	0	0	0	27.6736	0
EM_C08	0	0	15.9778	0	0	22.7573	0	0	0	0	0	0	0	22.6594	0	0	0	0	23.6165	0	0	0	0	0	0	25.7016	0	0	0	0	0	0	0	0	0	0	0	0	0	22.8251	0	0	0	0	0	0	0	26.4674	22.3255
EM_C09	0	0	17.616	0	0	17.8782	0	0	0	0	0	21.2483	18.4563	17.441	0	0	0	19.5189	0	0	21.9733	0	0	0	0	25.072	0	0	0	0	0	23.2011	23.992	22.6579	0	19.1697	0	0	0	23.1847	0	23.552	0	0	0	0	0	26.8563	22.2399
EM_C11	0	0	0	0	0	21.5585	0	0	0	0	0	0	0	0	0	0	0	0	0	0	0	0	0	0	0	23.1	0	0	0	0	22.6304	0	0	0	0	0	0	0	0	21.8699	0	0	0	0	0	0	0	27.169	22.0224
EM_D03	0	0	14.7584	0	0	0	0	0	0	0	0	17.8797	0	22.4611	0	0	0	0	23.2878	0	0	0	0	0	0	25.3107	0	0	0	0	0	23.1425	0	0	0	0	0	0	0	0	0	0	0	0	0	0	0	27.8076	0
EM_D05	0	22.0403	18.4582	0	0	0	0	0	0	0	0	0	0	24.0975	0	0	0	23.4523	0	0	0	0	0	0	0	25.3703	0	0	0	0	17.183	23.9725	24.5141	0	0	23.6509	0	0	0	21.4797	0	0	22.4672	0	0	0	0	27.3815	24.1984
EM_D06	0	0	18.4071	0	0	0	0	0	0	0	0	0	0	25.484	0	0	17.9566	0	0	0	0	0	0	0	0	27.085	0	0	0	0	0	0	0	0	0	0	0	0	0	0	0	0	23.7008	0	0	0	0	27.5978	0
EM_D07	0	21.7451	0	0	0	0	16.5578	0	0	0	0	0	19.2169	24.5586	0	0	0	0	0	0	0	0	0	0	0	24.9703	0	0	0	0	0	17.0773	0	0	0	0	0	0	0	22.1167	0	0	23.2918	0	0	0	0	27.9121	24.7526
EM_D08	0	20.724	18.0372	0	0	0	0	0	0	0	0	0	0	23.1372	0	0	18.8005	0	23.8903	0	0	0	0	0	0	23.737	0	0	0	0	0	0	23.6976	19.7634	0	25.56	24.1851	0	0	0	0	20.4967	22.8751	0	0	0	0	27.8797	0
EM_D10	0	20.2683	16.5606	0	0	18.0841	0	0	0	0	0	0	0	24.8688	0	0	0	0	24.4203	0	0	0	0	0	0	26.9644	0	0	0	0	0	0	0	0	0	0	0	0	20.8108	22.8948	0	0	0	0	0	0	0	26.8629	25.7747
EM_D12	0	0	18.13	0	0	0	0	0	0	0	0	0	0	0	0	0	0	21.0406	0	0	0	0	0	0	0	25.3414	0	0	0	0	0	0	0	0	0	0	22.643	0	0	0	0	0	24.0326	0	0	0	0	26.9659	23.3177
EM_E02	0	0	0	0	0	25.1365	0	0	0	0	0	0	16.7531	17.0959	0	0	21.0981	0	22.9496	0	0	0	0	0	0	25.0671	0	0	0	0	20.942	23.3166	17.3097	0	0	23.1665	0	0	0	0	23.9175	0	0	0	0	0	0	27.8988	22.1178
EM_E05	0	0	18.0023	0	0	0	0	0	0	0	0	0	0	25.7433	0	0	0	0	0	0	0	0	0	0	0	25.2343	0	0	0	0	0	0	0	0	0	22.511	0	0	0	23.4786	0	0	0	0	0	23.5564	0	28.2143	0
EM_E06	0	0	17.903	0	0	22.5588	0	0	0	0	0	0	0	23.4209	0	0	21.3494	21.0963	0	0	0	0	0	0	0	26.8139	0	0	0	0	19.6861	0	0	0	0	22.3878	0	0	0	23.6013	0	20.3634	0	0	0	0	0	27.3712	22.4721
EM_F03	0	20.4709	18.4657	0	0	22.9457	0	0	0	0	0	14.9146	0	24.0748	0	21.4662	17.2169	24.1672	0	0	0	0	0	19.4096	0	26.4931	0	0	0	0	20.1004	21.089	20.4665	18.5719	0	24.0406	22.5003	0	0	22.8781	0	17.4267	16.7749	0	0	0	0	27.8767	16.4704
EM_F04	0	21.2673	14.9661	0	0	22.4109	0	0	21.7913	0	0	0	0	22.6726	0	0	19.2668	23.1918	0	0	0	0	0	0	0	25.8337	0	0	0	0	19.4597	0	0	22.0291	0	0	0	0	0	21.0543	0	0	0	0	0	0	0	26.4931	0
EM_F05	0	0	0	0	0	0	0	0	0	0	0	0	0	24.0516	0	0	22.2978	0	22.9409	0	0	0	0	0	0	23.0803	0	0	0	0	0	0	0	0	0	0	20.4431	22.3473	0	0	0	19.3581	0	0	0	0	0	27.2219	0
EM_F06	17.024	21.1411	16.6808	0	0	0	0	0	0	0	0	0	0	20.7216	0	0	20.7968	14.8128	23.4504	0	22.2312	0	0	0	0	24.2512	0	0	0	0	12.8792	20.5234	0	0	0	17.6995	0	18.4	16.5533	0	0	21.4422	0	0	0	0	16.3804	27.1725	24.7661
EM_F07	0	0	16.3511	0	0	0	0	0	0	0	0	0	0	24.3121	0	0	0	0	0	0	0	0	0	0	0	25.8739	0	0	0	0	21.8328	0	0	0	0	0	0	21.775	0	21.4076	0	0	0	0	0	0	0	27.9544	0
EM_F08	0	0	19.1362	0	0	21.4361	0	0	0	0	0	19.2493	0	24.5386	0	0	0	23.2816	23.0581	0	0	0	0	0	0	24.4872	0	0	0	0	0	0	0	0	0	0	0	0	0	0	0	23.1066	0	0	0	0	0	26.8753	0
EM_F09	0	20.1532	16.0239	0	0	22.3797	0	0	0	0	0	0	0	22.1667	0	0	21.9555	0	22.8688	0	0	0	0	0	0	24.3832	0	0	0	0	0	21.6287	0	0	0	23.8791	0	0	0	22.994	0	20.0452	0	0	0	0	0	26.7955	0
EM_F10	0	0	18.3326	0	0	0	0	0	0	0	0	0	0	0	0	0	20.6662	0	0	0	0	0	24.1336	0	0	21.9568	0	0	0	0	0	0	0	0	0	24.7423	0	0	0	0	0	0	23.6231	0	0	0	0	26.6062	0
EM_F11	0	14.6502	17.0086	0	0	22.3756	0	0	0	0	0	16.2732	0	0	0	0	0	0	23.4149	0	0	0	0	0	0	24.79	0	0	0	0	19.482	0	0	0	0	0	23.8006	0	0	22.2861	0	0	0	0	0	0	0	27.9356	23.1855
EM_F12	0	22.0058	19.0179	0	0	21.1432	0	0	0	0	0	0	0	23.0728	0	0	0	0	0	0	0	0	0	18.069	0	25.3249	0	22.4604	0	0	0	0	23.5766	0	0	22.4851	0	0	0	23.4226	0	22.7459	0	0	0	0	0	27.365	0
EM_G02	0	0	18.0448	0	0	22.3843	0	0	0	0	0	0	0	25.199	0	0	16.6577	0	24.6697	0	21.6823	0	0	0	0	23.7726	0	0	0	0	0	0	22.5675	0	0	25.2989	22.468	0	0	22.4215	0	20.4471	23.1892	0	0	0	0	27.1044	0
EM_G03	0	15.5181	15.6465	0	0	19.0629	0	0	0	0	0	0	0	23.6742	0	17.3948	0	18.7276	23.417	0	0	0	23.0786	18.1711	0	25.971	0	0	0	0	15.3439	22.0695	20.824	18.5599	0	21.5314	18.2513	16.4291	17.3815	21.7458	0	17.8973	18.9962	0	0	0	16.4867	27.3307	22.1615
EM_G05	0	0	16.5193	0	0	20.1427	0	0	0	0	0	0	0	23.4062	0	24.0421	22.3521	20.8551	20.0152	0	22.3619	0	19.0079	22.9527	0	25.7432	0	0	0	0	22.4396	20.2875	23.6768	14.52	0	20.7104	19.5861	0	0	21.8639	0	0	16.8475	0	0	0	0	28.3342	20.4141
EM_G08	0	0	19.1256	0	0	0	0	0	0	0	0	0	0	25.3169	0	0	0	23.0977	0	0	0	0	0	0	0	25.9384	0	24.2408	0	0	0	0	0	0	0	23.4314	0	0	0	23.9514	0	0	22.747	0	0	0	0	27.5916	24.3913
EM_G11	0	0	16.6817	0	0	17.7856	21.2365	0	0	0	0	0	0	25.154	0	0	0	0	0	0	0	0	0	0	0	24.2688	0	0	0	0	0	0	0	0	0	0	21.7577	0	0	22.0659	0	0	22.4468	0	0	0	0	27.042	0
EM_G12	0	0	0	0	0	23.8201	0	0	0	0	0	0	16.2461	25.807	0	0	0	0	0	0	0	0	23.4076	21.8915	0	26.0904	0	0	0	0	0	0	23.4367	20.7875	0	0	0	0	0	22.7524	0	0	0	0	0	0	23.0072	28.2513	22.8549
EM_H01	12.1179	0	19.3946	0	0	0	0	0	0	0	0	0	0	23.6055	0	0	0	24.2511	0	0	0	0	0	0	0	25.4395	0	0	0	0	21.7934	0	23.7319	0	0	0	20.4408	0	0	23.4135	0	17.7394	23.009	0	0	0	23.2545	29.0909	0
EM_H02	0	21.3377	0	0	0	24.137	21.2937	0	0	0	0	20.9698	0	24.3851	0	0	20.8934	0	24.3591	0	0	0	0	24.0863	0	26.6489	0	0	0	0	0	23.6858	0	23.2725	0	0	0	0	0	21.2398	0	0	0	0	0	0	0	26.745	0
EM_H03	0	0	16.4827	0	0	22.0602	0	0	0	0	0	0	0	20.8418	0	0	0	0	23.6021	0	0	0	0	0	0	23.4372	0	0	0	0	0	22.9624	0	0	0	22.0597	0	0	20.1922	0	0	0	0	0	0	0	0	26.6154	0
EM_H04	0	0	19.9598	0	0	22.2586	0	0	0	0	0	0	0	24.0458	0	0	0	23.2931	24.0872	0	0	0	0	23.2234	0	25.4392	0	23.2262	0	0	0	22.6805	0	22.489	0	23.01	0	0	0	0	0	21.1349	23.9651	0	0	0	0	28.0899	22.6188
PCR_ctl	0	0	0	0	0	0	0	0	0	0	0	0	0	0	0	0	0	0	0	0	0	0	0	0	0	0	0	0	0	0	0	0	0	0	0	0	0	0	0	0	0	0	0	0	0	0	0	0	0
PCR_ctl	0	0	0	0	0	0	0	0	0	0	0	0	0	0	0	0	0	0	0	0	0	0	0	0	0	0	0	0	0	0	0	0	0	0	0	0	0	0	0	0	0	0	0	0	0	0	0	0	0
N_A04	0	0	17.9191	0	0	21.6598	0	0	0	0	0	0	0	23.2629	0	0	18.794	0	0	0	0	0	0	0	0	20.5472	0	0	0	0	20.648	21.6112	0	0	0	21.2341	19.7612	0	0	0	0	0	0	0	0	0	0	27.219	0
N_A05	0	0	16.3661	0	0	22.3915	19.9641	0	0	0	0	20.5767	0	20.4977	0	0	0	0	20.884	0	0	0	0	21.4894	0	23.1863	0	0	0	0	0	0	0	0	0	22.4735	0	0	0	20.143	0	21.8497	21.1888	21.2585	0	22.1778	0	26.5274	0
N_07	0	0	19.2513	0	0	23.4974	0	0	0	0	0	0	0	23.5568	0	0	0	0	0	0	22.2704	0	0	19.5374	0	0	0	0	0	0	0	0	0	0	0	0	0	0	0	0	0	0	21.9212	0	0	0	0	27.3449	0
N_A08	0	19.6773	18.0691	0	0	0	0	0	0	0	0	0	0	0	0	0	0	0	0	0	0	0	0	21.1959	0	23.1229	0	0	0	0	0	0	0	0	0	21.5123	21.7926	0	0	0	0	0	22.5434	20.0052	0	0	0	27.3219	0
N_A10	0	0	15.807	0	0	23.7519	0	0	0	0	0	0	0	21.742	0	0	0	0	0	0	20.5127	0	0	19.4297	0	22.3702	0	0	0	0	0	0	0	20.5379	0	22.1593	0	0	0	19.8674	0	0	0	0	0	0	0	26.763	0
N_A11	0	19.6562	15.6565	0	0	0	0	0	0	0	0	18.9979	0	0	0	20.8963	0	0	20.8397	0	0	0	0	21.1856	0	23.0821	0	0	0	0	0	0	19.7703	0	0	0	0	0	0	0	0	0	0	0	0	0	0	27.0217	21.3288
N_B02	0	19.4735	16.5898	0	0	22.7501	0	0	0	0	0	21.9116	0	23.1922	0	0	0	0	20.8595	0	0	0	0	0	0	0	0	0	0	0	0	0	0	0	0	21.1301	20.6997	0	0	0	0	18.3392	0	19.9231	0	21.7063	0	27.0829	0
N_B03	0	0	0	0	0	0	0	0	0	0	0	18.5079	0	20.0566	0	0	18.7284	0	0	0	0	0	0	0	0	23.6406	0	0	0	0	0	0	0	0	0	20.8239	21.2083	0	0	18.9522	0	0	22.1813	0	0	0	0	26.9692	0
N_B04	0	0	17.9722	0	0	0	0	0	0	0	0	0	0	21.719	0	0	16.7227	0	0	0	0	0	0	19.1366	0	23.3712	0	0	0	0	0	0	0	0	0	0	0	0	0	19.0059	0	18.3065	0	0	0	22.5943	0	26.1974	0
N_B05	0	0	18.2474	0	0	20.7175	0	0	0	0	0	19.2359	0	0	0	20.6362	0	0	0	0	0	0	15.6284	0	0	21.3408	0	0	0	0	0	21.0239	0	0	0	0	17.4085	22.0177	0	21.2745	0	0	0	0	0	0	0	26.6743	0
N_B06	0	0	15.5499	0	0	21.0962	0	0	19.4044	0	0	0	16.1378	22.3331	0	16.7733	0	0	22.2348	0	21.3082	0	0	21.2269	0	22.714	0	0	0	0	0	0	22.1139	0	0	0	20.9021	0	0	0	0	0	16.8236	16.6946	0	0	0	26.831	0
N_B07	0	0	15.0752	0	0	0	0	0	0	0	0	18.8619	0	0	0	0	17.0408	0	17.8794	0	0	0	0	15.8605	0	23.0762	0	0	0	0	20.3871	0	0	0	0	20.906	0	0	0	19.3975	0	0	20.9801	20.2755	0	17.0128	0	26.8841	20.9601
N_B08	0	20.6232	15.4235	0	0	21.6573	0	0	0	0	0	21.7744	0	22.7819	0	16.891	0	0	19.6625	0	22.223	0	0	0	0	23.7934	0	0	0	0	20.1214	0	0	0	0	22.0041	0	0	19.3687	21.5682	0	20.4379	0	0	0	0	0	27.023	0
N_B09	0	0	16.6527	0	0	22.4424	19.2625	0	0	0	0	0	0	0	0	0	20.2744	0	0	0	21.5369	0	0	0	0	23.9402	0	0	0	0	0	0	0	0	0	0	20.8885	0	0	0	0	0	20.8173	0	0	0	0	26.2687	0
N_B10	0	0	15.9768	0	0	22.548	0	0	0	0	0	20.5179	19.2749	0	0	0	0	0	20.7909	0	0	0	0	19.6683	0	23.3509	0	0	0	0	19.7033	0	20.5446	0	0	22.1537	0	0	0	20.5711	0	0	0	0	0	0	0	26.2263	0
N_B11	0	0	17.3257	0	0	22.2231	0	0	0	0	0	0	0	0	0	0	0	0	0	0	0	0	0	20.205	0	21.3986	0	0	0	0	20.1034	0	0	0	0	0	18.95	0	0	20.2824	0	0	20.3022	18.7001	0	21.1661	0	26.1876	0
N_B12	0	0	18.4326	0	0	0	0	0	0	0	0	18.5907	0	23.7369	0	0	0	0	22.2372	0	0	0	0	0	0	24.5895	0	0	0	0	0	22.2123	0	0	0	18.2679	0	0	0	21.0021	0	19.4502	0	0	0	0	0	26.5854	0
N_C01	0	20.0616	17.1133	0	0	23.4267	0	0	0	0	0	15.9127	0	20.6797	0	0	19.0403	0	0	0	0	0	0	16.2627	0	22.4749	0	0	0	0	0	0	0	0	0	0	0	0	0	21.0793	0	0	0	20.97	0	0	0	26.9514	0
N_C03	0	0	17.8505	0	0	0	0	0	0	0	0	19.313	0	21.0047	0	0	0	0	0	0	21.7145	0	0	17.0679	0	23.14	0	0	0	0	22.0335	0	0	0	0	0	0	0	0	0	0	0	0	0	0	0	0	26.6304	0
N_C04	0	0	18.0702	0	0	22.411	0	0	0	0	0	20.5787	0	0	0	0	0	0	22.1876	0	22.3956	0	0	0	0	21.5209	0	0	0	0	0	20.6199	21.3764	0	0	0	21.4926	0	0	0	0	0	20.2844	0	0	22.7347	0	27.1553	0
N_C05	0	17.7061	16.923	0	0	19.3772	0	0	0	0	0	0	0	23.1629	0	19.8553	18.6677	0	21.1536	0	0	0	0	0	0	21.6581	0	0	0	0	0	0	0	0	0	0	19.2266	0	0	0	0	0	20.9544	0	0	0	0	26.2076	19.7579
N_C08	0	19.978	14.9056	0	0	21.4445	0	0	0	0	0	20.4526	0	23.1338	0	0	20.1579	0	20.9948	0	0	0	17.1295	20.3813	0	23.3612	0	0	0	0	0	0	0	0	0	0	20.0728	0	0	20.2612	0	20.0047	21.4283	0	0	0	0	26.9088	0
N_C10	0	0	16.5967	0	0	0	0	0	0	0	0	0	0	22.0377	0	21.8497	0	0	0	0	0	0	21.1073	0	0	22.549	0	0	0	0	0	0	0	0	0	21.1214	20.819	0	0	21.5755	0	0	21.2936	20.9453	0	20.5109	0	26.9274	0
N_C11	0	21.5678	16.9582	0	0	0	0	0	0	0	0	17.3086	0	22.0031	0	0	0	0	18.3569	0	22.146	0	0	0	0	23.4163	0	0	0	0	0	0	0	0	0	0	0	0	0	0	0	20.7534	20.1106	19.7596	0	0	0	26.9863	0
N_C12	0	19.5583	17.9608	0	0	20.3446	19.2105	0	0	0	0	21.2757	0	20.7482	0	21.9509	0	0	21.0861	0	0	0	0	0	0	22.7182	0	0	0	0	21.1234	17.5501	0	0	0	0	0	0	0	21.6277	0	0	21.5151	21.3415	0	0	0	26.5251	0
N_D01	0	0	18.1672	0	0	21.9965	0	0	0	0	0	21.9551	16.7434	21.8254	0	0	0	0	22.1907	0	21.2099	0	0	22.1725	0	22.3628	0	0	0	0	19.1898	22.194	0	0	0	21.4342	17.5122	0	0	0	0	0	0	0	0	21.674	0	27.2145	0
N_D02	0	20.1615	16.0539	0	0	22.8616	0	0	0	0	0	0	0	20.9684	0	0	19.8428	0	21.678	0	21.7964	0	0	0	0	23.833	0	0	0	0	18.933	0	0	20.7916	0	0	0	0	0	22.5452	0	0	22.1435	20.1711	0	0	0	26.9519	0
N_D03	0	0	17.4817	0	0	21.7566	0	0	0	0	0	0	0	0	0	0	0	0	22.1543	0	22.5753	0	0	0	0	23.7213	0	0	0	0	0	0	0	0	0	21.3346	20.6908	0	0	0	0	19.4827	0	0	0	0	0	26.3944	21.3768
N_D07	0	0	15.3993	0	0	21.7435	0	0	0	0	0	0	0	0	0	0	0	0	19.4305	0	0	0	0	0	0	0	0	0	0	0	0	21.3846	0	0	0	0	21.7336	0	0	18.8109	0	19.5775	0	0	0	0	0	26.7562	0
N_D08	0	0	18.3064	0	0	21.0101	0	0	0	0	0	19.4228	0	22.5622	0	0	0	0	22.7832	0	0	0	0	21.0288	0	0	0	0	0	0	0	0	0	0	0	0	19.456	0	0	0	0	21.2949	0	0	0	0	0	26.3519	0
N_D11	0	0	0	0	0	20.9446	0	0	0	0	0	0	0	23.5421	0	0	0	0	0	0	0	0	17.438	20.5963	0	20.0097	0	0	0	0	0	0	0	0	0	0	0	0	0	0	0	0	0	0	0	21.1625	0	27.3914	0
N_D12	0	0	16.3491	0	0	22.6791	0	0	0	0	0	0	18.9378	21.2127	0	20.6668	0	0	21.0706	0	22.2805	0	17.383	0	0	0	0	0	0	0	0	0	0	0	0	22.3702	0	0	0	0	0	0	0	0	0	0	0	26.3858	0
N_E02	0	16.4545	15.6166	0	0	20.9269	0	0	0	0	0	20.36	0	22.2197	0	0	0	0	22.4647	0	0	0	0	0	0	21.897	0	0	0	0	0	22.988	0	21.2356	0	0	22.3144	0	15.3093	18.6957	0	0	21.4922	17.1472	0	22.4497	0	26.9827	0
N_E04	0	20.2489	15.9118	0	0	21.3463	0	0	0	0	0	0	0	0	0	0	0	0	0	0	0	0	0	20.5203	0	23.0826	0	0	0	0	21.5074	0	0	0	0	0	22.0556	0	0	0	0	17.8757	0	0	0	0	0	27.3417	0
N_E05	0	0	0	0	0	23.1819	0	0	0	0	0	21.3797	0	22.7657	0	0	0	0	0	0	0	0	0	21.6899	0	24.4471	0	0	0	0	19.9605	17.0357	0	0	0	0	0	0	0	17.7988	0	0	19.6661	0	0	0	0	27.1542	0
N_E06	0	20.2434	18.0678	0	0	23.7698	16.1567	0	0	0	0	21.4532	0	22.7272	0	17.1809	0	0	21.5168	0	0	0	17.3091	16.6566	16.5487	24.687	0	0	0	0	20.8019	21.0305	20.1659	19.463	0	21.1437	20.1607	16.3325	0	21.4956	0	0	18.6351	17.8088	0	18.3807	16.8367	28.3188	21.3318
N_E07	0	20.2209	16.3874	0	0	0	0	0	0	0	0	0	0	0	0	0	17.3286	0	19.8739	0	21.4951	0	0	0	0	24.0468	0	0	0	0	0	0	0	0	0	0	0	17.9604	0	20.7417	0	21.1324	0	0	0	0	0	26.2468	0
N_E08	0	0	16.4267	0	0	20.4057	0	0	0	0	0	21.3485	0	0	0	0	0	0	0	0	0	0	0	0	0	21.5648	0	0	0	0	0	0	0	0	0	20.4377	0	0	0	0	0	0	0	0	0	21.2334	0	26.1331	21.8034
N_E09	0	0	17.1951	0	0	22.3035	0	0	0	0	0	0	0	20.2544	0	0	0	0	23.1203	0	0	0	0	0	0	22.422	0	0	0	0	0	0	0	0	0	0	17.618	0	0	0	0	0	21.2314	0	0	0	0	26.8621	0
N_E11	0	20.3254	15.8079	0	0	21.7497	0	0	0	0	0	0	0	21.1207	0	0	0	0	0	0	22.1115	0	0	0	0	22.2751	0	0	0	0	22.1104	22.1414	0	0	0	0	0	0	0	19.2456	0	0	0	0	0	0	0	27.4206	0
N_F01	0	18.9405	16.6006	0	0	0	18.7278	0	0	0	0	0	0	22.4893	0	0	0	0	0	0	0	0	0	19.77	0	0	0	0	0	0	0	0	0	0	0	20.8119	0	0	17.5449	0	0	0	0	0	0	0	0	26.6754	0
N_F03	0	0	18.6806	0	0	22.6899	0	0	0	0	0	0	0	0	0	0	0	0	0	0	21.036	0	0	23.1303	0	22.7449	0	0	0	0	0	22.7324	0	0	0	0	21.133	0	0	21.4452	0	20.2159	22.3554	0	0	0	0	28.0792	0
N_F04	0	0	14.3887	0	0	21.12	0	0	0	0	0	18.8277	0	20.8651	0	0	0	0	19.7445	0	20.2793	0	0	0	0	24.2762	0	0	0	0	0	0	0	0	0	22.8619	19.1523	0	0	21.0373	0	0	0	20.0909	0	22.3845	0	26.6566	0
RT_CTL	0	0	0	0	0	0	0	0	0	0	0	0	0	17.3406	0	21.5585	0	0	0	0	21.6629	0	0	0	0	17.994	0	0	0	0	0	0	0	0	0	0	21.7528	0	0	0	0	0	20.9962	0	0	0	0	22.3566	17.7231
RT_CTL	0	22.1031	20.4821	0	0	24.6065	0	0	0	0	0	24.4207	0	25.166	0	18.9552	0	0	21.4791	0	19.9783	0	0	21.1881	19.8898	27.3554	0	0	0	0	22.8049	23.2549	22.2086	21.5686	0	24.0889	21.6871	20.9207	20.6492	23.7238	0	18.6141	21.1421	20.0063	0	21.3969	19.3196	30.5902	23.4438
CTX_A02	0	0	16.8997	0	0	21.5297	17.3312	0	0	0	0	0	0	0	0	19.3868	0	0	21.1301	0	20.6178	0	20.6578	0	0	23.3382	0	22.5828	0	0	0	20.7162	0	0	0	21.3913	0	0	0	22.1366	0	0	20.4199	21.0218	0	0	0	24.3495	20.8646
CTX_A03	0	0	17.0999	0	0	0	0	0	0	0	0	0	0	23.472	0	0	18.7308	0	20.6932	0	0	0	0	19.4507	0	24.3336	0	0	0	0	0	0	22.2804	0	0	0	0	0	16.5211	21.7575	0	20.4821	21.2252	0	0	0	0	25.265	0
CTX_A06	0	0	17.5911	0	0	21.8066	0	0	0	0	0	0	16.6174	23.9439	0	19.847	17.1449	0	22.3735	0	21.0129	0	0	21.5241	0	23.9708	0	0	0	0	17.4327	21.3013	0	22.573	0	20.3995	19.5974	0	18.9987	0	0	0	20.489	0	0	0	0	26.6618	0
CTX_A09	0	20.2394	14.8999	0	0	0	0	0	0	0	0	0	0	24.7388	0	17.0438	0	0	22.5869	0	0	0	0	0	0	21.9086	0	0	0	0	0	22.8851	21.564	0	0	21.2433	0	0	0	23.0229	0	22.2157	0	0	0	20.9963	0	23.5025	0
CTX_A12	0	19.4426	17.2526	0	0	0	0	0	0	0	0	0	19.541	22.9902	0	0	0	0	21.4145	0	22.142	0	0	0	0	24.331	0	0	0	0	0	20.4847	0	0	0	22.4763	0	19.6381	0	21.672	0	0	22.1366	0	0	0	0	25.1804	19.4676
CTX_B02	0	21.472	18.6473	0	0	22.9088	0	0	0	0	0	0	20.4684	21.7175	0	23.1464	0	0	23.539	0	0	0	21.8941	23.5057	0	24.7476	0	20.72	0	0	0	0	22.1365	0	0	22.0399	0	19.84	19.7935	22.6373	0	22.7531	22.893	21.1571	0	0	0	26.0355	0
CTX_B04	0	0	15.785	0	0	0	0	0	0	0	0	0	0	0	0	0	18.5335	0	17.3321	0	21.7471	0	0	22.0608	0	23.9492	0	0	0	20.0781	17.8578	17.1519	0	0	0	20.8901	0	0	0	22.5667	0	0	0	0	0	16.8489	0	24.8799	0
CTX_B07	0	0	17.7201	0	0	21.0096	0	0	0	0	0	0	0	23.338	0	19.0503	19.6739	0	20.9349	0	0	0	0	17.0467	0	25.1122	0	0	0	0	0	22.6661	17.0115	0	0	23.8982	18.4683	0	0	20.7391	0	0	0	0	0	21.9679	0	24.9433	0
CTX_B10	0	0	18.0403	0	0	19.2241	0	0	20.1208	0	0	0	0	21.7916	0	0	0	0	22.5672	0	0	0	0	0	0	24.5606	0	20.8257	0	0	0	0	0	0	0	0	0	0	0	22.12	0	0	0	20.558	0	0	0	24.1616	0
CTX_C01	0	0	17.3654	0	0	19.51	17.7088	0	0	0	0	20.0158	0	0	0	0	0	18.1647	22.4008	0	0	0	0	22.2144	0	19.8831	0	0	0	0	0	0	0	0	0	0	0	0	0	20.9171	0	0	20.3724	21.0336	0	20.3766	0	25.4236	0
CTX_C02	0	0	18.1445	0	0	20.1999	0	0	0	0	0	0	0	22.3651	0	19.8879	16.2637	0	21.9049	0	21.1177	0	0	0	0	25.4925	0	21.7149	0	0	0	0	20.3597	0	0	21.744	0	0	0	22.9021	0	20.4833	0	0	0	20.7419	0	25.8816	0
CTX_C05	0	0	17.3539	0	0	20.1956	0	0	0	0	0	0	0	20.6614	0	17.409	19.1092	0	21.4726	0	0	0	0	21.64	0	24.8225	0	0	0	0	19.5363	20.5414	0	0	0	22.2939	19.1762	0	0	23.3665	0	17.8462	20.2586	16.2939	0	17.3425	0	25.4971	0
CTX_C06	0	0	15.7702	0	0	21.7789	19.8839	0	0	0	0	0	0	23.3742	0	0	0	21.1338	0	0	22.4368	0	0	0	0	24.951	0	0	0	0	0	0	0	0	0	22.2742	20.4599	0	0	22.7727	0	18.5016	21.5707	0	0	0	0	24.8396	0
CTX_C09	0	0	0	0	0	21.4176	0	0	0	0	0	0	0	20.3347	0	19.1234	0	0	19.2614	0	0	0	0	20.5736	0	24.4221	0	21.2512	0	0	0	0	0	0	0	21.5924	20.2724	0	0	20.0958	0	20.6793	0	21.3646	0	0	0	24.8757	0
CTX_C10	0	0	16.9194	0	0	0	0	0	0	0	0	0	0	0	0	20.585	0	0	20.0418	0	0	0	0	0	0	20.4732	0	0	0	0	0	22.8026	0	0	0	20.3524	0	0	18.9354	18.5852	0	18.7437	0	0	0	0	0	25.0418	22.2675
CTX_C11	0	0	17.0078	0	0	0	0	16.1731	0	0	0	0	19.341	0	0	18.7481	0	0	0	0	0	0	0	20.3665	0	23.8226	0	0	0	0	20.111	0	0	0	0	22.8267	18.3033	0	0	22.4503	0	19.6635	22.5507	22.2569	0	0	0	25.406	0
CTX_C12	0	0	18.2807	0	0	0	0	0	0	0	0	0	0	22.0629	0	0	17.8317	0	21.0876	0	21.8008	0	0	0	0	24.2979	0	19.7278	0	0	0	20.5002	20.6041	0	0	0	21.7023	0	0	21.7318	0	0	20.01	0	0	22.2111	0	25.1782	0
CTX_D01	0	0	15.7839	0	0	22.4059	0	0	0	0	0	0	0	0	0	23.0264	0	0	22.9673	0	20.2901	0	0	0	0	23.4926	0	0	0	0	0	0	0	0	0	22.9845	19.388	20.2862	0	21.3612	0	0	21.2029	0	0	21.0269	0	25.14	0
CTX_D02	0	0	15.8931	0	0	21.252	0	0	0	0	0	0	15.6381	20.9754	0	0	0	0	22.9534	0	0	0	0	16.97	0	23.6156	0	0	0	0	17.1361	21.4029	0	0	0	23.247	17.6478	0	0	22.2417	0	0	0	0	0	20.1691	0	25.1379	0
CTX_D05	0	0	17.5225	0	0	20.7184	0	0	0	0	0	0	0	20.103	0	0	0	0	0	0	21.9036	0	0	22.3697	0	24.7378	0	21.6308	0	0	20.2916	19.7062	21.0496	0	0	21.4964	19.422	0	16.1109	0	0	0	0	0	0	0	0	25.5936	0
CTX_D06	0	0	17.321	0	0	20.193	0	0	0	0	0	0	0	0	0	20.4993	0	19.9733	0	0	0	0	0	0	0	24.5991	0	0	0	0	0	0	0	0	0	22.3733	20.4779	0	0	21.6896	0	0	0	0	0	0	0	26.0016	0
CTX_D09	0	0	0	0	0	17.1879	0	0	0	0	0	0	0	21.157	0	0	17.0963	0	21.764	0	21.614	0	21.1011	0	0	25.008	0	20.1594	0	0	19.475	22.2097	0	0	0	21.9338	20.0548	0	0	22.4048	0	0	19.0025	0	0	0	0	25.6262	0
CTX_E01	0	21.0646	17.4014	0	0	0	0	0	0	0	0	0	0	23.0455	0	0	0	0	21.8306	0	19.9998	0	0	0	0	24.7716	0	21.192	0	0	18.9714	23.0286	0	0	0	21.2357	19.6687	0	0	22.1294	0	0	21.6829	0	0	0	0	26.8365	20.4457
CTX_E02	0	20.4689	16.716	0	0	0	0	0	0	0	0	0	16.7871	22.5514	0	0	19.7432	0	0	0	0	0	0	20.5911	0	22.6962	0	0	0	0	20.4572	17.0835	0	0	0	21.0126	20.98	0	0	17.6707	0	0	0	0	0	0	0	25.495	0
CTX_E04	0	19.1527	18.546	0	0	21.0894	16.3228	0	0	0	0	0	0	17.8217	0	21.7864	17.3903	0	22.628	0	0	0	0	17.1183	0	20.3468	0	19.0053	0	0	0	22.5992	18.1756	0	0	19.1408	0	0	17.3754	19.614	0	0	19.1851	16.486	0	17.9512	0	25.1903	20.6292
CTX_E07	0	0	17.6828	0	0	0	0	0	0	0	0	0	0	0	0	0	0	0	23.2169	0	0	0	0	0	0	22.154	0	0	0	0	0	23.3484	20.7891	0	0	21.288	0	0	0	22.5157	0	0	21.9515	21.9436	0	0	0	25.3068	0
CTX_E09	0	19.5946	0	0	0	0	0	0	0	0	0	0	0	20.0004	0	0	20.4508	0	21.2699	0	0	0	0	22.0082	0	24.7813	0	20.8317	0	0	21.1255	0	0	0	0	0	0	0	0	22.5553	0	0	22.3158	0	0	0	0	24.876	0
CTX_E10	0	0	16.4987	0	0	0	0	0	21.0138	0	0	0	0	22.247	0	0	0	0	22.0135	0	0	0	20.4319	0	0	23.4391	0	20.3325	0	0	0	0	0	0	0	22.4635	0	0	0	20.4677	0	0	19.5044	0	0	0	0	25.4089	21.6195
CTX_E11	0	0	15.6731	0	0	21.5113	0	0	0	0	0	0	0	22.553	0	0	0	0	18.1922	0	21.7905	0	0	0	0	24.6533	0	0	0	0	0	0	0	0	0	23.1297	20.8871	0	0	20.4187	0	0	20.9815	20.1324	0	0	0	25.6458	0
CTX_E12	0	0	17.4936	0	0	0	0	0	0	0	0	0	17.391	21.9184	0	0	15.968	0	0	0	21.3485	0	0	0	0	24.2088	0	22.9006	0	0	21.2123	22.1047	0	0	0	22.2513	0	0	0	20.2517	0	0	0	0	0	0	0	26.1426	0
CTX_F01	0	20.2889	15.5507	0	0	0	0	0	0	0	0	0	0	17.209	0	0	0	0	22.6212	0	22.2873	0	0	18.7856	0	22.3807	0	0	0	0	0	21.9078	0	0	0	17.4066	21.1095	0	0	20.6247	0	0	0	20.5723	0	20.0908	0	25.5055	0
CTX_F08	0	20.4266	16.8804	0	0	22.0323	0	0	0	0	0	0	0	19.0743	0	14.822	0	0	0	0	0	0	17.3975	0	0	23.7657	0	17.7707	0	0	0	0	17.0648	17.7163	0	21.6579	20.1623	18.7092	0	22.322	0	0	20.9016	19.405	0	0	0	25.2975	18.3939
CTX_F09	0	0	17.7491	0	0	22.1232	0	0	0	0	0	0	0	22.4802	0	0	20.2207	0	20.1817	0	21.8658	0	21.1843	0	0	23.2542	0	0	0	0	0	0	20.2634	0	0	21.1468	17.6768	0	0	21.3814	0	0	20.5602	0	0	19.9772	0	25.3016	0
CTX_F10	0	17.3807	15.8214	0	0	19.4397	17.1768	0	0	0	0	0	0	23.2962	0	20.3157	19.6678	19.587	21.2192	0	0	0	0	21.1521	0	21.5822	0	0	0	0	16.8137	21.2351	17.0199	0	0	18.9743	0	0	18.1919	19.5773	0	0	22.2241	16.7262	0	22.6007	21.3514	25.5586	17.4509
CTX_F11	0	0	15.9543	0	0	17.4197	0	0	19.7748	0	0	0	0	21.1426	0	14.9136	18.2438	0	18.0905	0	0	0	0	21.1875	0	23.8302	0	0	0	0	20.0494	18.2185	17.9989	0	0	20.5331	18.5436	0	17.3205	21.659	0	0	21.698	19.8309	0	19.1247	0	24.9968	17.3632
CTX_G01	0	0	16.7201	0	0	21.5399	0	0	0	0	0	0	17.4594	20.426	0	19.7789	19.316	0	20.0279	0	0	0	14.1932	21.0905	0	23.9885	0	0	0	0	19.4478	21.4735	21.3362	0	0	18.1809	22.6911	0	18.611	21.0422	0	0	20.9883	18.2589	0	21.2218	0	25.196	0
CTX_G03	0	0	18.7255	0	0	16.3749	0	0	0	0	0	0	0	21.4407	0	20.3935	0	0	22.9508	0	0	0	15.0575	20.7139	0	23.261	0	22.5887	0	0	0	18.1022	21.2835	0	0	20.1634	16.8612	0	20.1205	23.1977	0	18.6055	21.783	0	0	20.8632	0	24.9308	21.2018
CTX_G04	0	0	18.6166	0	0	21.9546	19.5345	0	15.1652	0	0	0	20.7325	0	0	21.6886	19.0223	0	23.6533	0	22.1518	0	19.3962	22.9283	0	23.3356	0	0	0	0	0	20.6173	21.8289	0	0	23.3201	21.4019	0	0	0	0	22.3869	0	21.6552	0	0	0	25.3218	0
CTX_G06	0	0	0	0	0	23.1102	0	0	0	0	0	0	17.3891	0	0	0	19.8713	0	21.0402	0	21.1906	0	18.5917	0	0	23.701	0	0	0	0	0	0	0	0	0	16.1588	0	0	18.7414	22.0409	0	21.9532	0	0	0	0	0	25.0526	0
CTX_G08	0	0	19.3022	0	0	18.0832	0	0	0	0	0	0	0	0	0	0	19.6205	0	22.5798	0	0	0	21.5784	0	0	24.4189	0	0	0	0	21.3462	20.2925	0	0	0	19.6813	0	0	0	22.0418	0	20.2361	20.1847	0	0	0	0	25.4108	0
CTX_G10	0	0	18.6686	0	0	21.4276	17.4844	0	0	0	0	0	0	22.6708	0	0	0	20.5496	0	0	0	0	15.6324	0	0	23.6805	0	0	0	0	0	0	0	0	0	19.6594	0	0	0	22.5234	0	0	23.3108	0	0	21.5867	0	25.7292	0
CTX_H01	0	20.8068	0	0	0	0	0	0	0	0	0	0	0	22.2507	0	0	0	0	21.121	0	21.0247	0	17.1427	20.894	0	24.7846	0	21.885	0	0	0	21.2757	0	0	0	22.0304	0	20.8406	0	21.8083	0	0	0	0	0	0	0	25.1361	0
CTX_H02	0	0	18.5535	0	0	0	0	0	0	0	0	0	18.173	21.7369	0	22.0733	0	0	0	0	22.1275	0	16.9799	20.8894	0	24.0803	0	0	0	0	0	22.6375	0	0	0	0	18.1096	0	0	21.096	0	21.7102	0	0	0	0	0	26.2646	0
PCR_CTL	0	0	0	0	0	0	0	0	0	0	0	0	0	0	0	0	0	0	0	0	0	0	0	0	0	0	0	0	0	0	0	0	0	0	0	0	0	0	0	0	0	0	0	0	0	0	0	0	0
PCR_CTL	0	0	0	0	0	0	0	0	0	0	0	0	0	0	0	0	0	0	0	0	0	0	0	0	0	0	0	0	0	0	0	0	0	0	0	0	0	0	0	0	0	0	0	0	0	0	0	0	0
* Because of technical failure on this line for the CD4CTX T cells, these results were corrected and replaced by qPCR data to calculate the proportion of double positive cells. Data are Cp. In rood Cp boven de 35 were considered negative.
CTX_A02
CTX_A03
CTX_A06
CTX_A09
CTX_A12
CTX_B02
CTX_B04
CTX_B07
CTX_B10
CTX_C01	25.78
CTX_C02	39.64
CTX_C05	35.89
CTX_C06	23.84
CTX_C09	34.54
CTX_C10
CTX_C11	31.74
CTX_C12
CTX_D01
CTX_D02
CTX_D05
CTX_D06	25.91
CTX_D09
CTX_E01
CTX_E02	38.18
CTX_E04	36.29
CTX_E07
CTX_E09
CTX_E10
CTX_E11
CTX_E12
CTX_F01
CTX_F08	35.86
CTX_F09	33.07
CTX_F10	24.91
CTX_F11	30.05
CTX_G01	31.73
CTX_G03	33.16
CTX_G04	34.96
CTX_G06	33.41
CTX_G08	33.32
CTX_G10	24.74
CTX_H01	40.19
CTX_H02	42.15
[truncated: 47 more columns]
