# Supplementary material for: The transcription factors Runx3 and ThPOK cross-regulate acquisition of cytotoxic function by human Th1 lymphocytes
Source: eLife journal article supplement (doi:10.7554/elife.30496), 2018-02-28
Supplement: supp [file elife-30496-supp-v1.zip › elife_poa_e30496_Figure_5_source_data_1.xlsx]

## Sheet: Figure 5
Figure 5-source data 1. Transcriptional program underlying the expression of perforin in Th1 cells.
Figure 5e. Raw methylation level (beta values) for probes included in the heatmaps.
IlmnID	HD189_CD428-	HD194_CD428-	HD240_CD428-	HD274_CD428-	HD361_CD428-	HD189_CD4CMTh1	HD194_CD4CMTh1	HD240_CD4CMTh1	HD274_CD4CMTh1	HD361_CD4CMTh1	HD189_naiveCD4	HD194_naiveCD4	HD240_naiveCD4	HD274_naiveCD4	HD361_naiveCD4	UCSC_RefGene_Name	UCSC_RefGene_Group
GZMH
cg02150910	0.076336	0.0602166	0.0572183	0.0663668	0.0596418	0.648913	0.449	0.637659	0.474102	0.40748	0.919374	0.94208	0.923312	0.928797	0.926315	GZMH	TSS1500
CX3CR1
cg00262061	0.414627	0.661548	0.135963	0.462249	0.380811	0.862457	0.83123	0.829511	0.831141	0.783036	0.817429	0.826611	0.830909	0.813791	0.81574	CX3CR1;CX3CR1;CX3CR1;CX3CR1	Body;TSS1500;TSS200;TSS1500
cg03296370	0.057129	0.0628623	0.0545196	0.0610728	0.0547195	0.30065	0.266643	0.315814	0.259034	0.292806	0.337925	0.44043	0.292921	0.377657	0.390287	CX3CR1;CX3CR1;CX3CR1;CX3CR1	1stExon;TSS1500;5'UTR;TSS1500
cg03341377	0.0813942	0.0977736	0.0803561	0.0800981	0.0780681	0.214584	0.213232	0.174839	0.200179	0.186337	0.201941	0.287207	0.198866	0.194668	0.237903	CX3CR1;CX3CR1;CX3CR1;CX3CR1	Body;5'UTR;5'UTR;5'UTR
cg04569233	0.0603821	0.0827508	0.0494851	0.12319	0.0698949	0.799696	0.732297	0.8208	0.770734	0.774483	0.900272	0.904293	0.913565	0.883677	0.924135	CX3CR1;CX3CR1;CX3CR1;CX3CR1;CX3CR1	Body;5'UTR;5'UTR;5'UTR;1stExon
cg05046858	0.455669	0.719575	0.153948	0.793028	0.434442	0.901481	0.876416	0.853145	0.875634	0.858079	0.882032	0.892751	0.873068	0.858657	0.872705	CX3CR1;CX3CR1;CX3CR1;CX3CR1;CX3CR1	Body;5'UTR;TSS1500;TSS1500;1stExon
cg13145644	0.933012	0.94187	0.940416	0.930072	0.945134	0.92452	0.914287	0.920917	0.945686	0.908287	0.945179	0.95049	0.964266	0.949924	0.951562	CX3CR1	TSS1500
cg18565762	0.0343941	0.0443426	0.0373757	0.0462316	0.0429811	0.0416636	0.0975712	0.145865	0.239437	0.172077	0.0336721	0.296329	0.266444	0.461364	0.411589	CX3CR1;CX3CR1;CX3CR1;CX3CR1;CX3CR1	Body;1stExon;5'UTR;TSS1500;5'UTR
cg19806398	0.422667	0.678124	0.267269	0.789455	0.544088	0.927124	0.910892	0.891204	0.890441	0.893443	0.945789	0.92453	0.937638	0.919277	0.919162	CX3CR1;CX3CR1;CX3CR1	TSS1500;TSS200;TSS1500
cg19838154	0.0548466	0.0574692	0.0576736	0.0716406	0.0572546	0.201071	0.177505	0.21675	0.166815	0.200055	0.232089	0.329972	0.208121	0.257978	0.274831	CX3CR1;CX3CR1;CX3CR1;CX3CR1	1stExon;TSS1500;5'UTR;TSS1500
cg21031692	0.0860764	0.112277	0.0753128	0.128123	0.093123	0.878073	0.755435	0.81988	0.805537	0.741765	0.876986	0.817223	0.870589	0.891938	0.799577	CX3CR1;CX3CR1;CX3CR1;CX3CR1	Body;5'UTR;5'UTR;TSS200
cg22917487	0.121303	0.156867	0.0682145	0.197895	0.0995985	0.869848	0.852371	0.845022	0.828718	0.875099	0.938811	0.943161	0.956344	0.940834	0.949757	CX3CR1;CX3CR1;CX3CR1;CX3CR1	Body;TSS200;5'UTR;TSS1500
cg24130739	0.0846729	0.0829418	0.0587889	0.0949839	0.0834453	0.606641	0.535816	0.576633	0.582537	0.600435	0.714808	0.768286	0.697061	0.764836	0.77177	CX3CR1;CX3CR1;CX3CR1;CX3CR1	1stExon;TSS1500;5'UTR;TSS1500
cg24310395	0.0846454	0.0628711	0.0662166	0.075009	0.0606535	0.0993663	0.0811937	0.0875063	0.078719	0.0723478	0.10782	0.141069	0.118662	0.104187	0.119416	CX3CR1;CX3CR1;CX3CR1;CX3CR1	Body;5'UTR;5'UTR;5'UTR
cg25784617	0.669543	0.820925	0.374968	0.878405	0.636535	0.886314	0.8818	0.850505	0.851369	0.853223	0.939919	0.922206	0.927785	0.933378	0.928287	CX3CR1;CX3CR1	TSS1500;TSS1500
cg26162331	0.442243	0.703371	0.162964	0.70971	0.490463	0.887046	0.861113	0.845225	0.850638	0.857246	0.896948	0.906671	0.891147	0.88875	0.888316	CX3CR1;CX3CR1;CX3CR1;CX3CR1;CX3CR1	Body;5'UTR;TSS1500;TSS1500;1stExon
GZMB
cg03875678	0.0249869	0.0346275	0.0306686	0.0375759	0.0312153	0.136624	0.111209	0.127015	0.0978303	0.0953278	0.390459	0.495436	0.379642	0.361651	0.373601	GZMB	TSS200
cg11025037	0.932702	0.847398	0.829119	0.913995	0.935179	0.866489	0.819709	0.843953	0.841736	0.881175	0.927501	0.91987	0.909285	0.909407	0.926893	GZMB	TSS1500
cg16212145	0.235854	0.401123	0.195998	0.607587	0.156226	0.778788	0.749369	0.775732	0.734261	0.675752	0.914164	0.934184	0.923858	0.927894	0.92315	GZMB	TSS1500
GNLY
cg10628126	0.447991	0.398758	0.251877	0.172798	0.10279	0.788599	0.778736	0.741623	0.738094	0.726844	0.945138	0.939327	0.95052	0.934312	0.952392	GNLY;GNLY	TSS200;TSS200
cg11752275	0.482051	0.463788	0.38471	0.506901	0.0915771	0.757458	0.710759	0.687295	0.705676	0.650117	0.933783	0.941934	0.922621	0.934321	0.951783	GNLY;GNLY	TSS1500;TSS1500
cg13603214	0.884832	0.921879	0.909086	0.930134	0.944208	0.924074	0.92124	0.920909	0.907741	0.912005	0.921941	0.939668	0.937629	0.928155	0.923018	GNLY;GNLY	TSS1500;TSS1500
cg16406960	0.309169	0.284997	0.206188	0.169194	0.113254	0.677359	0.634474	0.645733	0.605008	0.624117	0.874258	0.889162	0.888985	0.888593	0.883452	GNLY;GNLY	TSS200;TSS200
cg18310515	0.417144	0.328779	0.322266	0.12341	0.0871104	0.86748	0.827978	0.807728	0.77466	0.728765	0.902348	0.933828	0.921431	0.923637	0.921615	GNLY;GNLY;GNLY;GNLY	5'UTR;1stExon;1stExon;5'UTR
cg24620635	0.482758	0.365162	0.334519	0.24307	0.0697565	0.878192	0.843011	0.83417	0.8662	0.731864	0.89361	0.895726	0.895061	0.894302	0.859768	GNLY;GNLY	Body;5'UTR
cg25066857	0.131663	0.122126	0.0679156	0.0726246	0.0644914	0.395414	0.366201	0.374292	0.349731	0.331817	0.830974	0.860155	0.820289	0.819119	0.813013	GNLY;GNLY;GNLY;GNLY	5'UTR;1stExon;1stExon;5'UTR
CCL5
cg00447324	0.703167	0.799441	0.550837	0.80179	0.547711	0.92522	0.897161	0.921489	0.905911	0.869843	0.945581	0.952852	0.943009	0.950508	0.957944	CCL5	TSS1500
cg02867514	0.0546479	0.0509843	0.0535939	0.0633032	0.0664773	0.177655	0.123349	0.188963	0.122061	0.13328	0.840387	0.834053	0.847972	0.772339	0.816834	CCL5;CCL5	1stExon;5'UTR
cg08656816	0.0775687	0.0540241	0.0490444	0.0686083	0.0555318	0.0886467	0.0671908	0.119382	0.100659	0.0830779	0.745666	0.781102	0.723803	0.627563	0.778435	CCL5	TSS200
cg10315334	0.0702768	0.0591957	0.0618197	0.0683954	0.0765212	0.315368	0.204152	0.287867	0.22173	0.188959	0.884913	0.887504	0.865964	0.812885	0.900436	CCL5;CCL5	1stExon;5'UTR
cg12455187	0.957082	0.946074	0.948222	0.96213	0.947105	0.937223	0.938484	0.912462	0.950372	0.918345	0.945815	0.936838	0.943899	0.942539	0.953194	CCL5	TSS1500
cg19411729	0.0662137	0.0644997	0.0621072	0.0827112	0.0676085	0.279441	0.221193	0.289477	0.21061	0.184941	0.886927	0.87306	0.880016	0.853034	0.893375	CCL5	TSS1500
Figure 5f. Raw methylation level (beta values) for probes included in the heatmaps.
RUNX3
cg00929376	0.942504	0.876108	0.910915	0.901705	0.901781	0.92257	0.901627	0.89374	0.915084	0.915009	0.935489	0.901235	0.905217	0.898564	0.904504	RUNX3;RUNX3	TSS1500;Body
cg02970551	0.123034	0.0738955	0.0593594	0.0805952	0.0621605	0.109553	0.0900786	0.0547326	0.133225	0.0782074	0.215874	0.184572	0.193653	0.19497	0.16527	RUNX3;RUNX3	TSS1500;Body
cg04221877	0.865702	0.809496	0.782404	0.802162	0.808911	0.817576	0.792283	0.79716	0.832077	0.815464	0.830487	0.824704	0.812775	0.834875	0.846076	RUNX3;RUNX3	TSS1500;Body
cg04250451	0.97368	0.968854	0.970112	0.966082	0.969126	0.963378	0.96607	0.974022	0.969191	0.964527	0.961158	0.969777	0.973071	0.963552	0.97082	RUNX3;RUNX3	TSS1500;Body
cg04554131	0.0609637	0.0695399	0.0612973	0.0710183	0.0577996	0.0785152	0.0656396	0.0835529	0.0772767	0.0664224	0.0602349	0.0698592	0.0539196	0.0629861	0.0720728	RUNX3	TSS200
cg04907595	0.768376	0.80274	0.767735	0.731631	0.698627	0.746442	0.735673	0.695223	0.658749	0.675936	0.620482	0.761406	0.631087	0.636109	0.586334	RUNX3;RUNX3	TSS1500;Body
cg06037693	0.756789	0.727944	0.735863	0.782265	0.547793	0.825236	0.779537	0.803745	0.792651	0.692382	0.886731	0.902638	0.893309	0.895057	0.889571	RUNX3	TSS1500
cg06377278	0.0507067	0.0486753	0.0384119	0.0418994	0.0417706	0.0513179	0.0399491	0.0415876	0.0528276	0.0435015	0.0531784	0.0396874	0.0315838	0.0419532	0.0397952	RUNX3;RUNX3;RUNX3	1stExon;Body;5'UTR
cg06640822	0.0776807	0.0908581	0.0621952	0.0881036	0.0623487	0.258379	0.20881	0.245269	0.224815	0.150081	0.127696	0.218584	0.119761	0.215511	0.109221	RUNX3;RUNX3	1stExon;5'UTR
cg07236781	0.866977	0.856739	0.623367	0.7449	0.582949	0.856882	0.750153	0.804338	0.805544	0.706136	0.926177	0.953095	0.91756	0.936573	0.942566	RUNX3	1stExon
cg07801894	0.161014	0.157652	0.0971176	0.209274	0.0970592	0.545246	0.414421	0.542613	0.398182	0.392184	0.838581	0.855976	0.827681	0.782793	0.86098	RUNX3	TSS1500
cg07996594	0.954834	0.956478	0.867725	0.936789	0.900038	0.908545	0.883712	0.892356	0.90912	0.839669	0.960463	0.95312	0.961721	0.947656	0.957607	RUNX3;RUNX3	TSS1500;Body
cg09993145	0.0672531	0.0727303	0.0627837	0.0777426	0.0520543	0.0989108	0.090208	0.115523	0.080617	0.0761339	0.0692143	0.0804468	0.0538217	0.0779933	0.0783727	RUNX3	TSS1500
cg10013501	0.882125	0.804057	0.817059	0.814347	0.837299	0.828509	0.809338	0.812872	0.842501	0.808865	0.816702	0.811293	0.823453	0.81686	0.841152	RUNX3;RUNX3	TSS1500;Body
cg10993442	0.883155	0.888148	0.722853	0.879339	0.759376	0.873577	0.840911	0.834537	0.85135	0.745002	0.936161	0.942354	0.923484	0.907887	0.920184	RUNX3;RUNX3	TSS1500;Body
cg11018723	0.0445493	0.0335388	0.0362848	0.0391811	0.0323875	0.0407934	0.0444045	0.0400193	0.0334713	0.0405924	0.0295435	0.0412295	0.0294293	0.0412989	0.0268722	RUNX3;RUNX3	Body;TSS200
cg11585280	0.577533	0.544674	0.489448	0.625731	0.441255	0.721553	0.639079	0.677832	0.685566	0.529789	0.768303	0.829822	0.778432	0.78866	0.75593	RUNX3	TSS1500
cg12459932	0.390048	0.464113	0.232388	0.480851	0.341921	0.773597	0.606644	0.645308	0.667467	0.571484	0.899896	0.922479	0.900148	0.90846	0.932339	RUNX3	TSS1500
cg13106389	0.795781	0.746673	0.632125	0.741224	0.64974	0.803265	0.74211	0.779911	0.759983	0.690586	0.882197	0.870748	0.830561	0.848389	0.842452	RUNX3;RUNX3	TSS1500;Body
cg13305657	0.909116	0.878834	0.878933	0.879205	0.886779	0.889704	0.876046	0.885454	0.904947	0.89046	0.881614	0.895794	0.892125	0.892495	0.899679	RUNX3;RUNX3	TSS1500;Body
cg13461622	0.084237	0.0769191	0.056798	0.108547	0.129851	0.263073	0.192926	0.209031	0.237834	0.159323	0.147399	0.229384	0.117036	0.257659	0.110271	RUNX3;RUNX3	1stExon;5'UTR
cg13629563	0.0433841	0.0405718	0.0436483	0.0485052	0.0370723	0.042511	0.0476518	0.0426952	0.0443923	0.044059	0.0517085	0.0479409	0.0436783	0.0422762	0.0367352	RUNX3;RUNX3	Body;TSS200
cg13898430	0.554822	0.564484	0.501932	0.550416	0.375504	0.65869	0.585595	0.619938	0.612599	0.537456	0.704823	0.750477	0.734975	0.734459	0.732638	RUNX3	TSS1500
cg14425908	0.168809	0.195762	0.116035	0.263099	0.102835	0.56797	0.422228	0.544981	0.461007	0.442612	0.768345	0.838087	0.809023	0.728216	0.825242	RUNX3	TSS1500
cg15014975	0.930868	0.908956	0.76674	0.85062	0.819407	0.818466	0.810857	0.789338	0.822507	0.761886	0.932009	0.930989	0.918775	0.936891	0.955712	RUNX3;RUNX3	TSS1500;Body
cg16529592	0.513737	0.459141	0.440103	0.586918	0.288589	0.826484	0.686642	0.735693	0.778633	0.59827	0.904153	0.91268	0.904038	0.915507	0.909063	RUNX3	TSS1500
cg18087266	0.897051	0.87564	0.846447	0.839118	0.789852	0.831551	0.835511	0.810395	0.812949	0.775205	0.809799	0.823557	0.807221	0.780019	0.768372	RUNX3;RUNX3	TSS1500;Body
cg19270505	0.123655	0.0880966	0.107029	0.115755	0.0754313	0.0989573	0.0820929	0.102747	0.102366	0.0728906	0.0918121	0.0786485	0.0797576	0.100484	0.0757474	RUNX3;RUNX3;RUNX3	1stExon;Body;5'UTR
cg19774846	0.538052	0.566537	0.528271	0.609801	0.353986	0.768671	0.669218	0.718316	0.749067	0.619338	0.858833	0.876609	0.876226	0.868463	0.887713	RUNX3	TSS1500
cg20695936	0.858322	0.867844	0.827758	0.872893	0.522937	0.854682	0.846626	0.812934	0.854954	0.776857	0.882674	0.885729	0.896985	0.871476	0.880173	RUNX3;RUNX3	TSS1500;Body
cg21406271	0.974503	0.960804	0.948069	0.95471	0.95341	0.964809	0.960349	0.958778	0.964447	0.960977	0.94836	0.939284	0.971072	0.960002	0.973088	RUNX3;RUNX3	TSS1500;Body
cg22153728	0.102655	0.0833769	0.100694	0.120523	0.0897603	0.150897	0.118854	0.143044	0.143959	0.115095	0.0880691	0.0959001	0.100569	0.102196	0.0924079	RUNX3	TSS200
cg22737001	0.0583458	0.0578928	0.0427698	0.0540601	0.0409236	0.054572	0.0519844	0.0480453	0.05069	0.0448341	0.0384336	0.0493558	0.0448919	0.0524709	0.0451536	RUNX3;RUNX3	TSS1500;Body
cg23916689	0.519496	0.534034	0.401043	0.57135	0.35804	0.80087	0.712351	0.744042	0.731524	0.627383	0.922293	0.90933	0.902899	0.890582	0.915881	RUNX3	TSS1500
cg24006721	0.956453	0.949387	0.944602	0.947408	0.965602	0.943495	0.950802	0.941765	0.947904	0.95027	0.948468	0.947121	0.95987	0.942679	0.945711	RUNX3;RUNX3	TSS1500;Body
cg24019564	0.511952	0.445255	0.361945	0.50542	0.364635	0.60158	0.497104	0.488448	0.499452	0.485428	0.762812	0.766303	0.689481	0.692668	0.720041	RUNX3;RUNX3	TSS1500;Body
cg24463471	0.935736	0.902718	0.917478	0.890648	0.918331	0.905438	0.909497	0.907853	0.905494	0.911169	0.904847	0.916757	0.90522	0.921736	0.908624	RUNX3;RUNX3	TSS1500;Body
cg24842859	0.585616	0.509342	0.370929	0.554142	0.353307	0.580259	0.442008	0.512726	0.462461	0.411686	0.628149	0.682925	0.550359	0.56887	0.61074	RUNX3;RUNX3	TSS1500;Body
cg25470148	0.938488	0.928981	0.831699	0.903712	0.91468	0.912137	0.921725	0.928001	0.89756	0.904061	0.92215	0.929276	0.932708	0.917206	0.932151	RUNX3;RUNX3	TSS1500;Body
cg25882256	0.902407	0.885242	0.87706	0.893078	0.879125	0.903038	0.86745	0.868551	0.886076	0.87653	0.889888	0.900063	0.891499	0.88804	0.893651	RUNX3;RUNX3	TSS1500;Body
cg26256263	0.918579	0.919339	0.909836	0.917949	0.920691	0.899706	0.910732	0.906166	0.924205	0.910996	0.929039	0.917925	0.914644	0.922397	0.916399	RUNX3;RUNX3	TSS1500;Body
cg26421310	0.089381	0.0805166	0.0757169	0.0782902	0.0823394	0.0796809	0.071898	0.0709172	0.0738749	0.0717997	0.0606578	0.0595516	0.0764354	0.0770301	0.0706238	RUNX3;RUNX3	TSS1500;Body
cg26672794	0.174206	0.162324	0.170284	0.201147	0.149516	0.176271	0.183886	0.163758	0.16013	0.177941	0.209049	0.178554	0.161567	0.172313	0.17897	RUNX3;RUNX3	TSS1500;Body
cg27058497	0.0735728	0.0709214	0.0735762	0.0740317	0.0569853	0.0890855	0.0865147	0.104509	0.0913147	0.092653	0.0660051	0.0811366	0.0588562	0.0741183	0.0623642	RUNX3	TSS200
HOPX
cg00019495	0.187088	0.065337	0.0690095	0.0595322	0.0758613	0.0723542	0.073745	0.0666838	0.061504	0.0731003	0.126059	0.172519	0.0909782	0.138334	0.101879	HOPX;HOPX;HOPX;HOPX;HOPX;HOPX	5'UTR;1stExon;1stExon;5'UTR;5'UTR;1stExon
cg00493422	0.366084	0.22885	0.243468	0.229997	0.234821	0.139881	0.175875	0.135748	0.146726	0.18756	0.174371	0.225984	0.0876893	0.207066	0.146135	HOPX;HOPX;HOPX	TSS200;TSS200;TSS200
cg01330221	0.128452	0.0958799	0.118313	0.137365	0.0998542	0.16415	0.109169	0.140383	0.135887	0.115945	0.13487	0.121101	0.110152	0.116436	0.106532	HOPX;HOPX;HOPX;HOPX;HOPX	5'UTR;Body;Body;TSS200;TSS200
cg03315456	0.952211	0.967039	0.961628	0.954518	0.972964	0.946072	0.962579	0.956464	0.943363	0.955504	0.963583	0.963407	0.965156	0.945405	0.961893	HOPX;HOPX;HOPX	5'UTR;5'UTR;5'UTR
cg04085076	0.0887079	0.0696063	0.0582069	0.0771184	0.0710233	0.0806774	0.0761491	0.0742383	0.0751257	0.0816089	0.14365	0.174776	0.102437	0.148468	0.111733	HOPX;HOPX;HOPX;HOPX;HOPX;HOPX	5'UTR;1stExon;1stExon;5'UTR;5'UTR;1stExon
cg04754315	0.0653725	0.0549948	0.0442679	0.06	0.0571295	0.195302	0.167367	0.162688	0.155749	0.145455	0.163897	0.181383	0.152917	0.171648	0.170742	HOPX;HOPX;HOPX;HOPX;HOPX	5'UTR;Body;Body;TSS200;TSS200
cg06306564	0.9535	0.956419	0.581967	0.961031	0.604096	0.951617	0.960866	0.600293	0.957847	0.619284	0.941422	0.931616	0.622558	0.951237	0.611712	HOPX;HOPX;HOPX	5'UTR;5'UTR;5'UTR
cg06771126	0.216088	0.0914038	0.103695	0.116812	0.0777326	0.0622169	0.0560586	0.056742	0.0443609	0.0553937	0.132615	0.163941	0.0885115	0.145169	0.0939969	HOPX;HOPX;HOPX;HOPX;HOPX;HOPX	5'UTR;1stExon;1stExon;5'UTR;5'UTR;1stExon
cg09125779	0.537356	0.509197	0.546009	0.487354	0.64068	0.434086	0.447192	0.411429	0.428246	0.458159	0.530881	0.502654	0.527557	0.489861	0.473436	HOPX;HOPX;HOPX	TSS200;TSS200;TSS200
cg13939978	0.0405377	0.0496053	0.0516637	0.059579	0.0443046	0.176875	0.127034	0.160723	0.134526	0.155534	0.184306	0.156399	0.200745	0.165332	0.165297	HOPX;HOPX;HOPX;HOPX;HOPX	5'UTR;Body;Body;TSS200;TSS200
cg14196225	0.124634	0.143266	0.110197	0.157971	0.125168	0.225274	0.170299	0.175904	0.183718	0.169039	0.207838	0.188654	0.186194	0.192498	0.183956	HOPX;HOPX;HOPX;HOPX;HOPX	5'UTR;Body;Body;TSS200;TSS200
cg16936060	0.112782	0.235594	0.0669992	0.376334	0.25402	0.718869	0.620278	0.743443	0.584082	0.704505	0.645119	0.52835	0.625325	0.47702	0.577985	HOPX;HOPX;HOPX;HOPX;HOPX	5'UTR;Body;Body;TSS1500;TSS1500
cg16975863	0.586387	0.473166	0.502992	0.56753	0.327519	0.442129	0.418156	0.422629	0.383807	0.376718	0.579327	0.596003	0.568279	0.554126	0.453435	HOPX;HOPX;HOPX	TSS1500;TSS1500;TSS1500
cg19673329	0.932007	0.928872	0.931478	0.922931	0.914557	0.913438	0.938783	0.919917	0.912703	0.937906	0.908761	0.922622	0.918067	0.914683	0.925307	HOPX;HOPX;HOPX	TSS1500;TSS1500;TSS1500
cg19978674	0.742978	0.683654	0.916144	0.823658	0.76272	0.80901	0.706722	0.872587	0.659873	0.813915	0.843562	0.733383	0.924475	0.730024	0.880389	HOPX;HOPX;HOPX;HOPX;HOPX	5'UTR;Body;Body;TSS1500;TSS1500
cg21899596	0.119172	0.123533	0.102291	0.129016	0.0974867	0.15936	0.135027	0.147037	0.143912	0.121924	0.121248	0.118313	0.123338	0.0964448	0.126187	HOPX;HOPX;HOPX;HOPX;HOPX;HOPX	1stExon;5'UTR;5'UTR;Body;Body;5'UTR
cg24852548	0.0543741	0.0646844	0.0577225	0.0581287	0.0496544	0.0697982	0.0476387	0.0630207	0.063266	0.0563443	0.059189	0.0528088	0.0482893	0.0578753	0.0541504	HOPX;HOPX;HOPX;HOPX;HOPX;HOPX;HOPX	1stExon;5'UTR;5'UTR;Body;Body;5'UTR;1stExon
cg25456368	0.657676	0.458996	0.475139	0.375247	0.443698	0.284985	0.31531	0.276585	0.320505	0.359623	0.265663	0.255856	0.172628	0.265924	0.210897	HOPX;HOPX;HOPX	5'UTR;5'UTR;5'UTR
cg25948037	0.0581825	0.114998	0.063441	0.195024	0.0783632	0.638869	0.477911	0.593567	0.491424	0.526739	0.674257	0.625247	0.653542	0.56609	0.580206	HOPX;HOPX;HOPX;HOPX;HOPX	5'UTR;Body;Body;TSS1500;TSS1500
cg27305383	0.0351358	0.0401117	0.0421342	0.0516236	0.0298287	0.197916	0.127817	0.148757	0.136616	0.143139	0.163987	0.179746	0.120938	0.168915	0.0935546	HOPX;HOPX;HOPX;HOPX;HOPX	5'UTR;Body;Body;TSS200;TSS200
ZNF683
cg04028874	0.49028	0.3855	0.408561	0.481559	0.526599	0.719094	0.689868	0.701877	0.705573	0.670977	0.80489	0.778551	0.790581	0.755903	0.744328	ZNF683;ZNF683	TSS1500;TSS1500
cg06114363	0.330024	0.273553	0.172273	0.3861	0.326571	0.586293	0.495008	0.505868	0.473416	0.463949	0.77392	0.817446	0.728423	0.753088	0.737399	ZNF683;ZNF683	TSS200;TSS200
cg08109646	0.885527	0.806314	0.871785	0.906374	0.901075	0.919116	0.934518	0.945049	0.901362	0.913353	0.93284	0.947053	0.941809	0.944728	0.960831	ZNF683;ZNF683	5'UTR;5'UTR
cg10705251	0.871293	0.846746	0.661078	0.883337	0.890137	0.927378	0.909502	0.914975	0.918254	0.894176	0.921737	0.935273	0.926152	0.920913	0.929761	ZNF683;ZNF683	TSS1500;TSS1500
cg17465336	0.604841	0.448318	0.208619	0.768942	0.530752	0.882174	0.860204	0.852614	0.864897	0.862101	0.878483	0.878716	0.874416	0.874719	0.889631	ZNF683;ZNF683	5'UTR;5'UTR
GFI1
cg00697033	0.0353621	0.0347324	0.0338164	0.0371458	0.0362079	0.0386072	0.0381013	0.0421517	0.0398423	0.0316045	0.0534382	0.0355534	0.0405666	0.0336213	0.0378148	GFI1;GFI1;GFI1	5'UTR;5'UTR;TSS1500
cg00791905	0.0833077	0.0703744	0.0783185	0.0730687	0.0678277	0.0913382	0.076849	0.0941377	0.0881986	0.0818969	0.0688152	0.0813169	0.0660791	0.0734974	0.0733331	GFI1;GFI1;GFI1	5'UTR;5'UTR;TSS1500
cg01258522	0.109414	0.101037	0.112114	0.127481	0.0823474	0.143898	0.11089	0.126348	0.111591	0.117059	0.120187	0.126105	0.109656	0.114541	0.112452	GFI1;GFI1;GFI1	5'UTR;5'UTR;TSS1500
cg01766941	0.200214	0.289891	0.215785	0.311186	0.160271	0.718295	0.549698	0.618598	0.52157	0.500751	0.806525	0.797008	0.780258	0.746613	0.832666	GFI1	TSS1500
cg01786314	0.128383	0.143133	0.143273	0.150824	0.14918	0.130654	0.130092	0.153283	0.141421	0.144984	0.137948	0.152035	0.162539	0.156541	0.138969	GFI1;GFI1;GFI1	5'UTR;5'UTR;TSS1500
cg03439815	0.079085	0.0804347	0.0700985	0.0958007	0.0798741	0.0872959	0.0755203	0.0872659	0.0765679	0.0782317	0.0897331	0.0919093	0.0876693	0.0747668	0.0722283	GFI1;GFI1;GFI1	5'UTR;5'UTR;TSS1500
cg04158367	0.294345	0.401114	0.170598	0.272682	0.064473	0.373687	0.364521	0.307613	0.33134	0.35276	0.217354	0.222635	0.173537	0.199938	0.192915	GFI1;GFI1	TSS1500;TSS200
cg04777348	0.109171	0.190555	0.0903276	0.147007	0.067358	0.726785	0.564998	0.573636	0.544792	0.439253	0.913751	0.917781	0.878364	0.919866	0.916342	GFI1;GFI1	TSS1500;TSS1500
cg04838747	0.11019	0.125187	0.105481	0.175711	0.0994387	0.16946	0.119917	0.128203	0.126754	0.106657	0.143089	0.119144	0.109516	0.125154	0.0952613	GFI1;GFI1;GFI1	5'UTR;5'UTR;TSS1500
cg05796321	0.220159	0.191195	0.204157	0.259865	0.179538	0.25796	0.194332	0.216833	0.202433	0.18333	0.247923	0.214836	0.205656	0.203945	0.196132	GFI1;GFI1;GFI1	5'UTR;5'UTR;TSS1500
cg06647562	0.0662338	0.0774444	0.0724247	0.0970102	0.0733023	0.0841831	0.0775582	0.0828513	0.0871608	0.0544407	0.101603	0.08569	0.0676973	0.0737598	0.0406065	GFI1;GFI1;GFI1	5'UTR;5'UTR;TSS1500
cg07011357	0.0457634	0.046176	0.0453951	0.0598062	0.0335854	0.0573608	0.0547309	0.0554176	0.0563309	0.0512775	0.0605386	0.0407377	0.0484252	0.0561954	0.0369698	GFI1;GFI1;GFI1	5'UTR;5'UTR;TSS1500
cg07805029	0.293108	0.432019	0.234033	0.427986	0.157551	0.879623	0.829755	0.856904	0.866248	0.698455	0.918381	0.937664	0.968408	0.937007	0.954094	GFI1	TSS1500
cg07968720	0.0606142	0.0708536	0.0632309	0.0654171	0.064787	0.071131	0.070046	0.0743278	0.0539797	0.0652535	0.0705934	0.0588167	0.0593579	0.061378	0.0539201	GFI1;GFI1;GFI1	5'UTR;5'UTR;TSS1500
cg08664810	0.185747	0.204065	0.146768	0.25185	0.163467	0.212966	0.152279	0.181928	0.178371	0.176066	0.203401	0.193616	0.178316	0.139949	0.189913	GFI1;GFI1;GFI1	5'UTR;5'UTR;TSS1500
cg08892208	0.0305436	0.0420746	0.0376128	0.042362	0.0321206	0.0332607	0.037626	0.037959	0.0460259	0.0382078	0.0435267	0.0458021	0.0307604	0.0420942	0.0368794	GFI1;GFI1;GFI1	5'UTR;5'UTR;TSS1500
cg09022720	0.0349623	0.0440822	0.0439356	0.0485929	0.0363669	0.0420219	0.036846	0.0449272	0.036161	0.0317563	0.0410328	0.0389974	0.03469	0.0325193	0.034127	GFI1;GFI1;GFI1	TSS200;5'UTR;5'UTR
cg09674502	0.211594	0.343779	0.237737	0.360889	0.194036	0.798675	0.75911	0.701366	0.683099	0.622793	0.802957	0.819467	0.852689	0.861506	0.874047	GFI1	TSS1500
cg10832495	0.0762846	0.0769383	0.0721219	0.0919254	0.0665191	0.0807817	0.0888045	0.0772524	0.0642306	0.0646853	0.0850904	0.0748899	0.0688846	0.0873721	0.0660763	GFI1;GFI1	TSS1500;5'UTR
cg11412935	0.0696636	0.0705448	0.0564577	0.0937314	0.0524234	0.0852283	0.056942	0.0880449	0.0927378	0.05909	0.0859592	0.0568967	0.0618832	0.0618198	0.0518828	GFI1;GFI1;GFI1	5'UTR;5'UTR;TSS1500
cg11522812	0.041245	0.0442418	0.0384911	0.0452759	0.0357029	0.0522403	0.0381139	0.0473587	0.0457948	0.0383781	0.0425361	0.0378661	0.0383988	0.0401732	0.0367561	GFI1;GFI1;GFI1	5'UTR;5'UTR;TSS1500
cg11785652	0.0409066	0.0456271	0.0448662	0.0556974	0.0392927	0.0493144	0.0575155	0.0436885	0.0412176	0.0399351	0.0472648	0.0372423	0.0386181	0.049484	0.0421717	GFI1;GFI1;GFI1;GFI1	5'UTR;1stExon;5'UTR;5'UTR
cg11954479	0.0705712	0.0555448	0.0512796	0.0734815	0.0541014	0.0734207	0.0661429	0.0830805	0.0555609	0.0580427	0.0693431	0.0687872	0.0557918	0.0751183	0.0725259	GFI1;GFI1	TSS1500;5'UTR
cg12810233	0.0525009	0.0683702	0.0705455	0.063308	0.0534663	0.0696185	0.0801895	0.0823972	0.0700738	0.0744209	0.066894	0.0780129	0.0610967	0.0740602	0.0510679	GFI1;GFI1;GFI1	5'UTR;5'UTR;TSS1500
cg13107975	0.0617979	0.0621409	0.0607845	0.0840311	0.0618553	0.0774694	0.0520199	0.0726139	0.0624264	0.0630403	0.0698073	0.0441135	0.054717	0.0631658	0.0504299	GFI1;GFI1;GFI1	TSS200;5'UTR;5'UTR
cg13138155	0.0276652	0.035654	0.0334002	0.0287059	0.030549	0.0335779	0.0282882	0.0355376	0.0326792	0.0358462	0.0320141	0.0252501	0.0317356	0.0390069	0.0332169	GFI1;GFI1;GFI1	5'UTR;5'UTR;TSS1500
cg13359699	0.0785361	0.0825618	0.0872455	0.0886453	0.0835981	0.0673575	0.0776431	0.0866093	0.0776796	0.0837989	0.0854571	0.0623242	0.0695891	0.0721382	0.063993	GFI1;GFI1;GFI1	5'UTR;5'UTR;TSS1500
cg13930300	0.0498997	0.0569905	0.0474105	0.0434983	0.0394253	0.0563036	0.0507975	0.0544872	0.0407042	0.0478288	0.0552601	0.045143	0.0399023	0.046047	0.0442652	GFI1;GFI1;GFI1	5'UTR;5'UTR;TSS1500
cg14475915	0.0522824	0.0587798	0.0456952	0.0574624	0.0415184	0.0574367	0.0537787	0.0464693	0.0629359	0.0465383	0.0515817	0.0607911	0.0458324	0.0485584	0.0427509	GFI1;GFI1	TSS1500;5'UTR
cg15068050	0.098128	0.0728259	0.0627718	0.090563	0.0605338	0.105122	0.0738535	0.0825332	0.0629461	0.0609007	0.0732601	0.0916388	0.0542787	0.0722543	0.0695399	GFI1;GFI1;GFI1	1stExon;5'UTR;5'UTR
cg15394350	0.037403	0.045717	0.0393317	0.0483455	0.0469038	0.0498712	0.0399471	0.044197	0.0409731	0.04223	0.0433632	0.043514	0.0390276	0.0441726	0.0422418	GFI1;GFI1;GFI1	5'UTR;5'UTR;TSS1500
cg16297569	0.119286	0.203943	0.0690369	0.16629	0.0521737	0.341254	0.266733	0.261525	0.254585	0.226978	0.296053	0.298755	0.189421	0.270194	0.22909	GFI1;GFI1	TSS1500;TSS200
cg16358430	0.0624835	0.0494242	0.0658615	0.0476478	0.0423482	0.0732826	0.0526453	0.0602725	0.0399035	0.0518144	0.0403933	0.0485998	0.0457757	0.0570838	0.0406471	GFI1;GFI1	TSS1500;5'UTR
cg16372625	0.0270502	0.0317857	0.0272045	0.031469	0.0256731	0.0331655	0.0265062	0.0355228	0.0258306	0.0216151	0.0323133	0.0267355	0.0216507	0.0241632	0.0248135	GFI1;GFI1;GFI1	5'UTR;5'UTR;TSS1500
cg16707062	0.0523167	0.0547437	0.0437975	0.0503726	0.0520102	0.0544337	0.0449604	0.0492728	0.0448495	0.0470254	0.0547588	0.0424488	0.0515949	0.0521287	0.0438987	GFI1;GFI1;GFI1	5'UTR;5'UTR;TSS1500
cg17858328	0.0917368	0.223587	0.068163	0.152131	0.0349585	0.27161	0.274693	0.228111	0.253495	0.177861	0.195898	0.221269	0.15424	0.211032	0.199275	GFI1;GFI1	TSS1500;TSS200
cg18182148	0.28575	0.267236	0.288293	0.267208	0.255597	0.32008	0.284928	0.294118	0.351414	0.234343	0.264594	0.223076	0.254132	0.279451	0.275063	GFI1;GFI1	TSS1500;TSS200
cg18221467	0.0489422	0.0319372	0.0441622	0.0442129	0.0379482	0.0518287	0.0547297	0.0439476	0.0415405	0.0286578	0.0488995	0.0401891	0.031591	0.0452186	0.0346648	GFI1;GFI1	TSS1500;5'UTR
cg19366591	0.0969419	0.087615	0.069457	0.0793237	0.0550784	0.0853624	0.0874044	0.0881411	0.0798904	0.0911921	0.0856399	0.0945407	0.0840745	0.0747623	0.0781785	GFI1;GFI1	5'UTR;5'UTR
cg20125091	0.135344	0.207993	0.0990636	0.165829	0.0652358	0.372272	0.310674	0.309276	0.291864	0.278312	0.444534	0.465776	0.353258	0.387549	0.375925	GFI1;GFI1	TSS1500;TSS1500
cg20164253	0.0596559	0.0520255	0.0451621	0.0548272	0.0410905	0.0694024	0.0522479	0.0444986	0.0517338	0.0390033	0.0478749	0.0466361	0.0358513	0.0425718	0.0436996	GFI1;GFI1	5'UTR;5'UTR
cg20244474	0.0716931	0.0684735	0.0700517	0.091087	0.0659167	0.0915727	0.0670727	0.0792173	0.0787006	0.0629261	0.0858317	0.0661381	0.0634955	0.0707289	0.0557389	GFI1;GFI1;GFI1;GFI1	5'UTR;1stExon;5'UTR;5'UTR
cg20813081	0.0663394	0.0693104	0.0718013	0.0640844	0.0742049	0.0871365	0.0600679	0.0688882	0.0734483	0.0618676	0.0845132	0.0603318	0.0471991	0.0744057	0.0576849	GFI1;GFI1;GFI1	5'UTR;5'UTR;TSS1500
cg22341104	0.154911	0.144816	0.107655	0.124104	0.10312	0.191765	0.148882	0.122902	0.130447	0.123166	0.117484	0.156825	0.13089	0.134222	0.114231	GFI1;GFI1	TSS1500;5'UTR
cg22488998	0.0804734	0.0766551	0.0656878	0.0671378	0.0705191	0.0782026	0.0736867	0.0598268	0.0759086	0.0654147	0.0739269	0.0805434	0.059942	0.0663422	0.0614722	GFI1;GFI1	TSS200;5'UTR
cg22628500	0.0495174	0.0569313	0.0464707	0.0686782	0.0421	0.0696428	0.0560531	0.0581215	0.0608269	0.0652835	0.0689458	0.0547397	0.0535531	0.0584028	0.0575513	GFI1;GFI1;GFI1	TSS200;5'UTR;5'UTR
cg23624705	0.102188	0.17438	0.083479	0.178391	0.0674228	0.502216	0.399547	0.439419	0.390483	0.323449	0.750336	0.762409	0.644761	0.696873	0.65005	GFI1;GFI1	TSS1500;TSS1500
cg23807354	0.0560281	0.057417	0.0602693	0.0630843	0.0498347	0.0618376	0.0536435	0.0573203	0.0491491	0.0501966	0.0593426	0.0583903	0.0446936	0.0544929	0.0572552	GFI1;GFI1;GFI1	5'UTR;5'UTR;TSS1500
cg23812393	0.151607	0.132134	0.133224	0.171464	0.143198	0.161281	0.15752	0.163008	0.163849	0.136154	0.180663	0.143003	0.146781	0.13891	0.145423	GFI1;GFI1;GFI1	5'UTR;5'UTR;TSS1500
cg24517501	0.105558	0.167461	0.0822978	0.144972	0.0665465	0.688444	0.549206	0.60786	0.531732	0.459147	0.870399	0.868672	0.836903	0.825477	0.857438	GFI1;GFI1	TSS1500;TSS1500
cg24683414	0.230294	0.374623	0.186134	0.234977	0.0706341	0.413	0.381485	0.342585	0.380872	0.358235	0.267112	0.279553	0.230537	0.256813	0.236893	GFI1;GFI1	TSS1500;TSS200
cg24999255	0.106626	0.0752808	0.0657724	0.0817096	0.0668958	0.0956	0.0763775	0.0875884	0.0901074	0.081579	0.0940075	0.088238	0.0770545	0.0670535	0.0649854	GFI1;GFI1;GFI1	1stExon;5'UTR;5'UTR
cg25232660	0.0642381	0.0673153	0.0727861	0.0714422	0.0603124	0.0735383	0.0707433	0.0765539	0.0661694	0.0672909	0.0734379	0.0644537	0.0584773	0.0683577	0.0637578	GFI1;GFI1	TSS1500;5'UTR
cg25320328	0.103565	0.140432	0.0870093	0.120822	0.0699767	0.574441	0.392017	0.427604	0.384849	0.359373	0.794603	0.787409	0.723391	0.716168	0.751984	GFI1;GFI1	TSS1500;TSS1500
cg26015176	0.0493819	0.0612208	0.0584404	0.0581196	0.0464236	0.0676583	0.0556743	0.0624254	0.0571447	0.0518519	0.0622166	0.0550506	0.038357	0.0550126	0.0399941	GFI1;GFI1;GFI1	5'UTR;5'UTR;TSS1500
cg26027669	0.210931	0.384572	0.161024	0.230132	0.055385	0.437421	0.385422	0.315003	0.328818	0.334551	0.282964	0.304909	0.230732	0.295411	0.272596	GFI1;GFI1	TSS1500;TSS200
cg27290394	0.0478282	0.0507134	0.0574368	0.0643859	0.0480586	0.0582045	0.0554234	0.0655653	0.0611462	0.0581736	0.0548703	0.0458563	0.0504068	0.0541337	0.0476883	GFI1;GFI1;GFI1	5'UTR;5'UTR;TSS1500
cg27432653	0.170224	0.298476	0.12614	0.162346	0.0529144	0.307982	0.290043	0.24778	0.263031	0.273154	0.173633	0.177912	0.142824	0.173964	0.184239	GFI1;GFI1	TSS1500;TSS200
LITAF
cg00403955	0.0445458	0.0494608	0.035714	0.0469512	0.0414636	0.0406093	0.0483495	0.0491455	0.0409955	0.0364456	0.125159	0.078959	0.0604521	0.117738	0.0636456	LITAF;LITAF;LITAF;LITAF	5'UTR;TSS200;5'UTR;Body
cg01267165	0.624185	0.695432	0.486019	0.79299	0.610683	0.897077	0.833831	0.821476	0.833898	0.848911	0.920006	0.910447	0.906458	0.917927	0.912825	LITAF;LITAF;LITAF;LITAF	TSS1500;TSS1500;TSS1500;TSS1500
cg01891736	0.18152	0.142679	0.105489	0.176216	0.163723	0.354588	0.343945	0.385355	0.396339	0.446195	0.236435	0.292588	0.186343	0.254302	0.276658	LITAF;LITAF;LITAF;LITAF	5'UTR;5'UTR;Body;5'UTR
cg02051924	0.556953	0.63856	0.388715	0.744917	0.644846	0.839724	0.745634	0.762688	0.709295	0.748457	0.915155	0.904874	0.906823	0.896402	0.909075	LITAF;LITAF;LITAF;LITAF	TSS200;TSS1500;TSS1500;TSS1500
cg03071793	0.357669	0.479435	0.394969	0.46794	0.405253	0.533544	0.481618	0.546895	0.48934	0.532275	0.680585	0.800662	0.728396	0.710152	0.757064	LITAF	TSS1500
cg04879381	0.0536573	0.0571542	0.0535976	0.0597618	0.0574276	0.0517013	0.0621463	0.0609663	0.0581967	0.0637229	0.0795397	0.0579288	0.0514231	0.0751643	0.0572498	LITAF;LITAF;LITAF;LITAF	TSS1500;TSS1500;Body;TSS1500
cg05205532	0.0630926	0.06534	0.0583599	0.0661149	0.056311	0.10375	0.0825643	0.0992308	0.105908	0.110769	0.0890576	0.0819893	0.0663134	0.0882236	0.0844777	LITAF;LITAF;LITAF;LITAF	5'UTR;5'UTR;Body;5'UTR
cg07143635	0.535011	0.666722	0.371694	0.793441	0.613427	0.857334	0.791536	0.741403	0.783645	0.805651	0.923392	0.936598	0.923972	0.913263	0.923323	LITAF;LITAF;LITAF;LITAF	TSS200;TSS1500;TSS1500;TSS1500
cg07208513	0.071921	0.0582744	0.0532665	0.068918	0.0603462	0.0656245	0.0580825	0.0594551	0.0594304	0.0453366	0.0731841	0.0517809	0.0517188	0.0673117	0.0591124	LITAF;LITAF;LITAF;LITAF	TSS1500;TSS200;Body;TSS200
cg07439791	0.0568166	0.0539926	0.0585158	0.0556777	0.0473463	0.0647401	0.0525805	0.0676477	0.0516784	0.0500621	0.0584433	0.0605175	0.0538504	0.0463602	0.0510195	LITAF;LITAF;LITAF;LITAF	5'UTR;TSS200;5'UTR;Body
cg07994696	0.0818024	0.084152	0.0834178	0.101783	0.0725683	0.157469	0.125643	0.131085	0.147388	0.129913	0.463972	0.478679	0.364716	0.439151	0.336577	LITAF;LITAF;LITAF;LITAF;LITAF	5'UTR;1stExon;5'UTR;Body;5'UTR
cg08001838	0.954168	0.958655	0.93989	0.937663	0.94763	0.94595	0.951319	0.949607	0.951888	0.948511	0.937504	0.941806	0.95617	0.944555	0.927824	LITAF;LITAF;LITAF	TSS1500;TSS1500;TSS1500
cg08268266	0.0831414	0.0954202	0.0914022	0.0971958	0.0726964	0.0845579	0.107017	0.0916079	0.0857341	0.0874708	0.100745	0.110572	0.0590512	0.104402	0.0677876	LITAF;LITAF;LITAF;LITAF	5'UTR;TSS200;5'UTR;Body
cg08592157	0.0410824	0.0479074	0.0453078	0.0534405	0.0475427	0.0534026	0.0450905	0.0532286	0.0468263	0.0364851	0.0488397	0.0470351	0.0516512	0.0497935	0.044708	LITAF;LITAF;LITAF;LITAF	5'UTR;TSS1500;5'UTR;Body
cg08767044	0.0578015	0.0484819	0.0469123	0.0651631	0.0486035	0.114768	0.0589819	0.0880647	0.0982958	0.0927125	0.114514	0.0935351	0.0728012	0.10593	0.103562	LITAF;LITAF;LITAF;LITAF	5'UTR;5'UTR;Body;5'UTR
cg09160589	0.07391	0.0642456	0.0668554	0.0720552	0.064961	0.145084	0.118497	0.131462	0.139347	0.115113	0.287523	0.28758	0.191402	0.237183	0.237296	LITAF;LITAF;LITAF;LITAF	5'UTR;5'UTR;Body;5'UTR
cg12876855	0.0781466	0.0985018	0.0832334	0.0822962	0.0755834	0.0904354	0.0788119	0.0868643	0.0909074	0.0864513	0.0942778	0.0999097	0.0825177	0.0864406	0.0806802	LITAF;LITAF;LITAF;LITAF	TSS1500;TSS1500;Body;TSS1500
cg16409651	0.10745	0.094468	0.0876673	0.104218	0.0776503	0.106612	0.086319	0.105361	0.110094	0.0786284	0.108461	0.0914316	0.0697738	0.098789	0.0735252	LITAF;LITAF;LITAF;LITAF	TSS1500;TSS200;Body;TSS200
NCALD
cg00569101	0.891236	0.933254	0.920069	0.9282	0.95339	0.858847	0.940906	0.924881	0.938477	0.905961	0.890953	0.9405	0.963122	0.925855	0.933405	NCALD	TSS1500
cg00680551	0.117891	0.0842252	0.0874661	0.107241	0.0871137	0.139378	0.149258	0.135451	0.104494	0.111441	0.0883362	0.103587	0.0915657	0.0909004	0.0914772	NCALD;NCALD;NCALD;NCALD;NCALD;NCALD;NCALD	5'UTR;5'UTR;5'UTR;5'UTR;5'UTR;5'UTR;5'UTR
cg01441025	0.122742	0.12821	0.0829669	0.183384	0.0791063	0.163902	0.141905	0.15246	0.142212	0.152246	0.158325	0.158676	0.127524	0.137319	0.123165	NCALD;NCALD;NCALD;NCALD;NCALD;NCALD;NCALD;NCALD	1stExon;TSS1500;5'UTR;TSS1500;TSS1500;TSS1500;TSS1500;TSS1500
cg01484156	0.961929	0.945749	0.954366	0.943303	0.936867	0.905181	0.918081	0.915835	0.916312	0.939601	0.940492	0.937181	0.96683	0.950852	0.955116	NCALD;NCALD;NCALD;NCALD;NCALD;NCALD;NCALD;NCALD	5'UTR;5'UTR;5'UTR;5'UTR;5'UTR;5'UTR;5'UTR;5'UTR
cg01666490	0.959487	0.909355	0.936071	0.904576	0.901167	0.863608	0.818947	0.772632	0.715079	0.787724	0.918545	0.914535	0.916407	0.914714	0.922411	NCALD;NCALD;NCALD;NCALD;NCALD;NCALD;NCALD	5'UTR;5'UTR;5'UTR;5'UTR;5'UTR;5'UTR;5'UTR
cg01971590	0.947194	0.946193	0.931349	0.931142	0.935506	0.885775	0.904183	0.813284	0.883775	0.897085	0.932357	0.937624	0.963349	0.942682	0.967814	NCALD;NCALD;NCALD;NCALD;NCALD;NCALD;NCALD	5'UTR;5'UTR;5'UTR;5'UTR;5'UTR;5'UTR;5'UTR
cg03031839	0.925339	0.908558	0.918078	0.906386	0.939537	0.926397	0.914828	0.910322	0.918186	0.910975	0.907928	0.914708	0.921196	0.917827	0.912017	NCALD;NCALD;NCALD;NCALD;NCALD;NCALD;NCALD	5'UTR;5'UTR;5'UTR;5'UTR;5'UTR;5'UTR;5'UTR
cg06400336	0.0496081	0.057728	0.0485358	0.0475351	0.0429877	0.0770923	0.0666415	0.0722031	0.056587	0.0596898	0.0692943	0.0625661	0.0610979	0.0564462	0.0600973	NCALD;NCALD;NCALD;NCALD;NCALD;NCALD;NCALD	TSS200;5'UTR;TSS200;TSS200;TSS200;TSS200;TSS200
cg07056138	0.104231	0.103513	0.0842814	0.113188	0.0753853	0.378037	0.329868	0.381962	0.340855	0.272557	0.62463	0.709534	0.520034	0.616291	0.545108	NCALD;NCALD;NCALD;NCALD;NCALD;NCALD;NCALD	5'UTR;5'UTR;5'UTR;5'UTR;5'UTR;5'UTR;5'UTR
cg09814849	0.821732	0.825831	0.840682	0.830612	0.857926	0.825645	0.808913	0.816756	0.830162	0.869851	0.837181	0.826434	0.850495	0.831716	0.84991	NCALD;NCALD;NCALD;NCALD;NCALD;NCALD;NCALD	TSS1500;TSS1500;TSS1500;TSS1500;TSS1500;TSS1500;TSS1500
cg10938478	0.919469	0.923781	0.904663	0.929441	0.933773	0.900826	0.904431	0.898614	0.913281	0.917445	0.90858	0.932796	0.943502	0.878413	0.904607	NCALD;NCALD;NCALD;NCALD;NCALD;NCALD;NCALD	5'UTR;5'UTR;5'UTR;5'UTR;5'UTR;5'UTR;5'UTR
cg12855331	0.921778	0.917106	0.872376	0.918829	0.897821	0.926609	0.932847	0.907888	0.915186	0.917692	0.915647	0.946708	0.947014	0.943136	0.952209	NCALD;NCALD;NCALD;NCALD;NCALD;NCALD;NCALD	5'UTR;5'UTR;5'UTR;5'UTR;5'UTR;5'UTR;5'UTR
cg14032371	0.888184	0.875735	0.888698	0.844268	0.838612	0.890911	0.902315	0.890017	0.85929	0.871811	0.916159	0.917482	0.910538	0.90528	0.902309	NCALD;NCALD;NCALD;NCALD;NCALD;NCALD;NCALD	TSS1500;TSS1500;TSS1500;TSS1500;TSS1500;TSS1500;TSS1500
cg15602215	0.962665	0.958096	0.960166	0.954874	0.971812	0.926446	0.955636	0.952583	0.964943	0.960505	0.934743	0.963093	0.965021	0.949155	0.970792	NCALD;NCALD;NCALD;NCALD;NCALD;NCALD;NCALD;NCALD	5'UTR;5'UTR;5'UTR;5'UTR;5'UTR;5'UTR;5'UTR;5'UTR
cg15836028	0.959084	0.959338	0.942033	0.931413	0.957675	0.939088	0.956383	0.945338	0.944867	0.963131	0.939418	0.958544	0.967983	0.934529	0.968972	NCALD;NCALD;NCALD;NCALD;NCALD;NCALD;NCALD	5'UTR;5'UTR;5'UTR;5'UTR;5'UTR;5'UTR;5'UTR
cg15842116	0.0689878	0.0715857	0.0597502	0.0785686	0.0621267	0.0864937	0.0749576	0.0944871	0.0844649	0.0671298	0.0732453	0.0745792	0.065939	0.0646026	0.0556868	NCALD;NCALD;NCALD;NCALD;NCALD;NCALD;NCALD	TSS1500;5'UTR;TSS1500;TSS1500;TSS1500;TSS1500;TSS1500
cg16265707	0.915907	0.897611	0.912841	0.880093	0.898659	0.852739	0.893957	0.926188	0.896391	0.92279	0.88321	0.896858	0.905646	0.870008	0.929507	NCALD;NCALD;NCALD;NCALD;NCALD;NCALD;NCALD;NCALD	5'UTR;5'UTR;5'UTR;5'UTR;5'UTR;5'UTR;TSS1500;5'UTR
cg16860004	0.159056	0.180057	0.0881984	0.222164	0.101547	0.463051	0.331967	0.406165	0.405072	0.271114	0.523106	0.50947	0.474548	0.460881	0.451076	NCALD;NCALD;NCALD;NCALD;NCALD;NCALD;NCALD	TSS1500;TSS1500;TSS1500;TSS1500;TSS1500;TSS1500;TSS200
cg17084151	0.466754	0.503697	0.698421	0.486424	0.488735	0.542649	0.487665	0.513948	0.480662	0.490448	0.625801	0.67035	0.577501	0.551306	0.557449	NCALD;NCALD;NCALD;NCALD;NCALD;NCALD;NCALD;NCALD;NCALD	5'UTR;5'UTR;5'UTR;5'UTR;5'UTR;5'UTR;5'UTR;1stExon;5'UTR
cg18304186	0.935203	0.934858	0.925672	0.934196	0.926188	0.940823	0.933418	0.935006	0.942105	0.922016	0.940167	0.940574	0.941806	0.918073	0.958037	NCALD;NCALD;NCALD;NCALD;NCALD;NCALD;NCALD	5'UTR;5'UTR;5'UTR;5'UTR;5'UTR;5'UTR;5'UTR
cg18983607	0.947098	0.952546	0.938811	0.939659	0.971029	0.940589	0.954384	0.926794	0.944487	0.944051	0.955553	0.958609	0.965766	0.940301	0.961198	NCALD;NCALD;NCALD;NCALD;NCALD;NCALD;NCALD	5'UTR;5'UTR;5'UTR;5'UTR;5'UTR;5'UTR;5'UTR
cg19135230	0.0646721	0.0593678	0.0631554	0.0713306	0.0523233	0.070214	0.0701909	0.073258	0.0637351	0.0639873	0.0565781	0.060114	0.0513436	0.0563045	0.060347	NCALD;NCALD;NCALD;NCALD;NCALD;NCALD;NCALD	5'UTR;5'UTR;5'UTR;5'UTR;5'UTR;5'UTR;5'UTR
cg19308132	0.126514	0.145255	0.0931923	0.165046	0.0760775	0.323418	0.294076	0.299784	0.301949	0.244647	0.433064	0.467807	0.382015	0.402104	0.367482	NCALD;NCALD;NCALD;NCALD;NCALD;NCALD;NCALD	TSS1500;TSS1500;TSS1500;TSS1500;TSS1500;TSS1500;TSS200
cg20039257	0.963791	0.963747	0.967718	0.965403	0.971558	0.952373	0.963899	0.965156	0.969781	0.960405	0.935928	0.95389	0.97436	0.969202	0.971656	NCALD;NCALD;NCALD;NCALD;NCALD;NCALD;NCALD;NCALD	5'UTR;5'UTR;5'UTR;5'UTR;5'UTR;5'UTR;5'UTR;5'UTR
cg20552220	0.38942	0.33007	0.418687	0.317393	0.448675	0.33835	0.29688	0.359727	0.275913	0.334771	0.486916	0.536463	0.501643	0.423209	0.489139	NCALD;NCALD;NCALD;NCALD;NCALD;NCALD;NCALD	5'UTR;5'UTR;5'UTR;5'UTR;5'UTR;5'UTR;5'UTR
cg21477907	0.117588	0.106015	0.127473	0.103942	0.0866095	0.126011	0.113912	0.112287	0.0917808	0.0895478	0.125	0.115707	0.0997761	0.127192	0.0793796	NCALD;NCALD;NCALD;NCALD;NCALD;NCALD;NCALD	5'UTR;5'UTR;5'UTR;5'UTR;5'UTR;5'UTR;5'UTR
cg23156226	0.945115	0.941235	0.935641	0.942243	0.94591	0.913883	0.956052	0.92327	0.922816	0.939419	0.948084	0.946869	0.960647	0.942965	0.943993	NCALD;NCALD;NCALD;NCALD;NCALD;NCALD;NCALD	5'UTR;5'UTR;5'UTR;5'UTR;5'UTR;5'UTR;5'UTR
cg24023489	0.912698	0.908434	0.900421	0.909358	0.902489	0.902723	0.911991	0.911869	0.92971	0.916431	0.942963	0.948646	0.947516	0.933599	0.951038	NCALD;NCALD;NCALD;NCALD;NCALD;NCALD;NCALD	5'UTR;5'UTR;5'UTR;5'UTR;5'UTR;5'UTR;5'UTR
cg26064870	0.794313	0.767386	0.590399	0.805122	0.873564	0.696033	0.539061	0.495326	0.508447	0.684332	0.906329	0.928208	0.910786	0.896644	0.90058	NCALD;NCALD;NCALD;NCALD;NCALD;NCALD;NCALD	5'UTR;5'UTR;5'UTR;5'UTR;5'UTR;5'UTR;5'UTR
cg26782361	0.919557	0.944444	0.861611	0.908763	0.926728	0.874459	0.864599	0.880998	0.898369	0.90375	0.876072	0.933276	0.942919	0.915118	0.935368	NCALD;NCALD;NCALD;NCALD;NCALD;NCALD;NCALD;NCALD	5'UTR;5'UTR;5'UTR;5'UTR;5'UTR;5'UTR;TSS1500;5'UTR
cg27008565	0.101047	0.0976658	0.0927274	0.12956	0.109949	0.390778	0.334824	0.456034	0.338357	0.267227	0.291373	0.364529	0.242128	0.325297	0.278792	NCALD;NCALD;NCALD;NCALD;NCALD;NCALD;NCALD	5'UTR;5'UTR;5'UTR;5'UTR;5'UTR;5'UTR;5'UTR
cg27110054	0.165557	0.202486	0.108462	0.244161	0.144768	0.515947	0.398769	0.485839	0.444518	0.338921	0.725565	0.730846	0.62467	0.700316	0.602526	NCALD;NCALD;NCALD;NCALD;NCALD;NCALD;NCALD	TSS1500;TSS1500;TSS1500;TSS1500;TSS1500;TSS1500;TSS200
cg27637873	0.95331	0.959151	0.947302	0.938284	0.968812	0.914604	0.94801	0.947345	0.95166	0.943225	0.955555	0.956015	0.928738	0.945644	0.962437	NCALD;NCALD;NCALD;NCALD;NCALD;NCALD;NCALD;NCALD	5'UTR;5'UTR;5'UTR;5'UTR;5'UTR;5'UTR;TSS1500;5'UTR
