# Supplementary material for: The transcription factors Runx3 and ThPOK cross-regulate acquisition of cytotoxic function by human Th1 lymphocytes
Source: eLife journal article supplement (doi:10.7554/elife.30496), 2018-02-28
Supplement: supp [file elife-30496-supp-v1.zip › elife_poa_e30496_Figure_6_source_data_1.xlsx]

## Sheet: Figure 6
Figure 6-source data 1. Naive CD4 T cells differentiate into CD4CTX in Th1 culture conditions in vitro.
Figure 6c. % of cells.
	P-GB+						P+GB-						P+GB+
N 0	0	0	0	0	0	0	0	0	0	0	0	0	0	0	0	0	0	0
Th1 3	0.3983	2.733	0.9473	1.12	0.204		0.417	1.093	0.2193	0.117	0.197		0.306	0.973	0.0313	0.0937	0.0123
Th1 7	20.6	50.8	23.3	16.1	32.9		0.399	1.11	0.912	3.38	0.519		8.45	11.5	7.48	10.1	26.4
Th1 14	16.4	77.7	19.6	14.2	55.3	15.9	6.54	0.0302	8.63	13.1	0.0507	4.52	12.8	18.9	36.8	34.2	43.9	27.3
th1 21	5.69	80.3	43.9	29.2			14.9	0.169	3.66	2.91			10.5	12.3	38.4	44.2
Th2 3	0.523	3.37	0.054	0.429	0.127		0.477	2.655	0.108	0.126	0.232		0.323	1.7	0.0162	0.0515	0.0332
Th2 7	0.164	0.214	0.428	0.391	2.28		0.82	3.4	1.39	6.07	2.33		0.171	0.249	0.183	0.44	1.22
Th2 14	0.263	0.617	0.111	1.81	1.88	10.4	0.315	1.27	0.371	6.87	10.9	2.93	0.0552	0.15	0.0121	1.02	1.54	2.58
Th2 21	1.7	2.29	0.115	2.15			0.888	0.573	0.0828	0.665			0.395	0.263	0.0231	0.434
Th17 3	0.3578	2.9	0.4578	0.272	0.101		0.3953	1.263	0.1718	0.0747	0.101		0.329	1.04	0.0408	0.0693	0.0224
Th17 7	14.9	6.63	4.89	1.9	14.9		0.488	0.699	0.169	3.64	0.605		2.24	0.93	0.289	0.823	2.51
Th17 14	5.26	13.1	0.0561	0.882	6.74	4.63	1.63	0.0789	0.0817	9.99	1.26	0.422	1.57	0.555	0.00934	1.21	1.88	0.464
Th17 21	9.68	1.92	0.356	2.03			2.86	0.311	0.0945	0.333			7.14	0.383	0.0417	0.314
Figure 6d. % lysis
	Th1				Th2				Th17				Th1 + ConA
1-1	8.57	6.7	2.485	11.96	0	0	0.185	0.23	0.48	1.4	0.125	0	5.22	7.2	0.845	2.8
3-1			5.475	41.76			0.295	0.66			1.595	0.04			0.745	4.04
5-1	31	18.8	11.495	55.86	1.68	3.8	1.235	1.81	5.09	4.4	0.365	0.87	4.82	8.4	1.925	6.07
9-1			15.195	75.26			0.985	4.16			0.565	2.56			0.005	5.25
20-1	53.5	34.7	18.895	81.76	9.1	2	2.925	8.76	32.4	37.5	0.625	11.36	25.2	10.7	1.195	7.76
Figure 6e. mRNA expression measured by qPCR. Fold change as compared to ex vivo isolated naive CD4 T cells
PRF1		Th1				Th2				Th17
	N0	D3	D7	D14	D21	D3	D7	D14	D21	D3	D7	D14	D21
	1		10	73	193		1	4	11		1	3	7
	1		3.3636	19.0273	23.2636
	1		6.6346	41.3553	76.6386
	1		10.7779	43.1115	55.3304		2.8879	4.5315	6.3203		1.3287	4.6268	8.5742
	1		11.0809	33.1285	36.5044		1.0353	2.4794	2.3784		2.7132	10.0561	23.7524
	1	1.0281	21.5557	89.8845	163.144	1.6021	3.7321	6.774	5.7757	0.6462	2.9282	8.3977	6.5432
	1	0.7071	11.7127	47.1766	80.4489	0.5105	1.6935	2.2974	5.6178	0.473	1.5369	4.1699	5.9381
	1			68.1197				4.2575				1.6935
	1	0.8645	18.7654	66.257		0.8011	4.7899	7.6741		1.1728	1.9185	5.6569
GZMB	N0	Th1 D3	Th1 D7	Th1 D14	Th1 D21	Th2 D3	Th2 D7	Th2 D14	Th2 D21	Th17 D3	Th17 D7	Th17 D14	Th17 D21
	1		19083	42642.4	40905.3		62.683	445.722	2740.08		9741.99	6562.36	5996.9
	1		15.0324	17.6305	11.0809
	1		9.51366	18.3792	19.9733
	1		53.8174	78.7932	68.1197		13.2691	18.8959	26.5382		36.7584	56.493	45.5696
	1		21.1121	9.25351	6.9644		3.22657	8.39773	6.774		13.5479	6.1475	9.57983
	1	12854.6	24491.6	27939.1	27746.2	103.25	141.04	45.89	34.54	2876.3	6427.31	2194.99	1009.9
	1	304.44	2521.38	2194.99	2998.45	14.93	48.5	46.21	94.35	106.15	989.12	613.11	451.94
	1			16844.6				1686.71				8659.09
	1	6517.03	57848.8	47643.8		172.45	1332.57	576.03		1573.76	27554.5	7383.04
IFNG	N0	Th1 D3	Th1 D7	Th1 D14	Th1 D21	Th2 D3	Th2 D7	Th2 D14	Th2 D21	Th17 D3	Th17 D7	Th17 D14	Th17 D21
	1		17929	32768	41190		6	4	33		19	12	14
	1		7858.29	7967.99	4482.23
	1		3795.3	46663.3	36358.4
	1		11036.5	21618.8	9541.5		3.03143	1.55833	5.61778		5.1337	16.2233	15.3482
	1			187.403	173.645		3.83706	2.47942	1.6245		12.996	12.3805	141.044
	1	39786.7	33923.6	11665.8	25888.1	4.34694	1.51572	0.25703	0.36602	70.0348	42.8137	2.78949	18.1261
	1	30152.7	28133.5	23657.3	137588	39.1245	12.7286	5.20537	66.257	242.191	99.0442	57.68	101.829
	1			45073.8				26.1729				13.3614
	1	17079.8	36107.2	84110.6		155.417	18.2522	33.1285		111.43	9.51366	82.1393
TBX21	N0	Th1 D3	Th1 D7	Th1 D14	Th1 D21	Th2 D3	Th2 D7	Th2 D14	Th2 D21	Th17 D3	Th17 D7	Th17 D14	Th17 D21
	1		3327	3444	3984		11	5	31		22	33	51
	1		21.1121	32.8996	23.1029
	1		319.573	1871.53	948.826
	1		724.077	1192.69	694.581		3.8371	1.5369	5.8159		20.2521	24.4201	19.8353
	1		70.5219	44.3235	51.2685		1.3566	0.6507	0.3978		2.9897	4.4076	8.3397
	1	792.353	797.865	1234.75	604.668	20.6776	2.8284	1.7777	1.0644	187.403	21.1121	8.1681	25.8125
	1	445.722	910.175	1016.93	364.557	19.4271	0.2285	2.8284	15.0324	89.8845	20.6776	15.2422	27.0958
	1			719.076				7.0128				8.0556
	1	1184.45	2740.08	4513.4		377.413	46.8507	38.0546		814.629	55.7152	68.5935
HOPX	N0	Th1 D3	Th1 D7	Th1 D14	Th1 D21	Th2 D3	Th2 D7	Th2 D14	Th2 D21	Th17 D3	Th17 D7	Th17 D14	Th17 D21
	1		724	3769	5518		28	53	237		205	685	1075
	1		28.6408	157.587	88.647
	1		115.36	975.501	1260.69
	1		243.875	1287.18	781.445		11.0809	27.4741	88.0347		61.3929	270.597	319.573
	1		7.2602	46.8507	24.761		0.5704	1.3013	5.5022		6.2333	26.5382	24.4201
	1	8.1117	458.253	1845.76	1067.48	2.2974	9.0005	135.298	178.527	1.9725	64.4452	206.5	146.018
	1	1.6358	238.856	975.501	704.277	1.5369	9.9177	50.9143	221.321	1.9453	64.4452	127.116	200.853
	1			3640.7				541.193				942.272
	1	0.9138	427.565	1458.23		1.8661	41.3553	191.341		1.8532	82.7106	194.012
EOMES	N0	Th1 D3	Th1 D7	Th1 D14	Th1 D21	Th2 D3	Th2 D7	Th2 D14	Th2 D21	Th17 D3	Th17 D7	Th17 D14	Th17 D21
	1		6.32	46.53	87.43		11.79	32.45	69.07		1.61	0.91	0.64
	1		4.6589	28.6408	20.2521
	1		4.7899	28.443	44.9422
	1		4.4383	25.1067	20.2521		19.6983	45.2548	35.0174		1.9053	0.7022	0.1571
	1		3.3636	2.4794	3.387		6.5432	7.3107	5.7757		1.181	0.6783	2.5491
	1	1.6133	12.1257	33.1285	73.5167	2.6759	14.2215	4.2871	4.9933	0.3015	1.6021	0.5396	1.057
	1	0.4698	3.4822	7.3107	14.3204	2	2.7132	10.1261	17.3878	0.7423	1.6358	1.2834	1.0644
	1			9.0631				8.9383				1.2483
	1	0.5176	5.6178	10.8528		4	7.5162	11.9588		0.1719	2.0994	1.7532
RUNX3	N0	Th1 D3	Th1 D7	Th1 D14	Th1 D21	Th2 D3	Th2 D7	Th2 D14	Th2 D21	TH17 D3	Th17 D7	Th17 D14	Th17 D21
	1		7.89	4.82	9.85		2	1.97	2.83		2.75	4.38	5.62
	1		5.85634	6.27667	3.63008
	1		3.86375	9.00047	8.45614
	1		5.89708	4.46915	3.09513		3.4822	1.84038	2.11404		4.65893	5.77572	3.65533
	1		9.78112	4.69134	4.11246		2.53151	3.05252	2.88786		5.9794	2.75108	4.46915
	1	4.31691	8.22491	8	5.31474	2.75108	1.81504	1.23971	0.62851	2.65737	2.8481	2.08493	1.81504
	1	2.82843	7.1602	4.85678	7.11074	2.07053	1.93187	1.53688	2.31338	3.16017	7.46426	4.85678	5.73582
	1			5.20537				3.91768				6.9644
	1	3.5801	8.05564	7.94474		3.07375	3.03143	4.56305		3.89062	5.50217	3.83706
ZBTB7B	N0	Th1 D3	Th1 D7	Th1 D14	Th1 D21	Th2 D3	Th2 D7	Th2 D14	Th2 D21	Th17 D3	Th17 D7	Th17 D14	Th17 D21
	1		3.8371	5.8971	12.1257		1.5801	2.3457	2.6208		1.9053	2.969	4.9246
	1		6.19026	11.0809	8.9383
	1		9.12611	19.1597	26.1729
	1		9.98664	7.94474	7.56846		5.24157	4.78991	4.43828		3.83706	7.06162	4.59479
	1		11.0043	6.32033	6.06287		4.82323	4.82323	4.59479		5.54044	3.55537	7.11074
	1	5.06303	9.51366	18.2522	14.5203	5.65685	3.86375	4.43828	2.80889	4.34694	5.85634	3.78423	5.81589
	1	2.17347	9.84916	9.78112	6.10504	2.18859	1.38511	3.55537	5.46416	2.9897	8.22491	8.1681	9.25351
	1			8.69388				3.29436				3.22657
	1	3.13834	15.7797	19.9733		5.20537	5.85634	8.63383		7.1602	10.0561	7.46426
