# Supplementary material for: The transcription factors Runx3 and ThPOK cross-regulate acquisition of cytotoxic function by human Th1 lymphocytes
Source: eLife journal article supplement (doi:10.7554/elife.30496), 2018-02-28
Supplement: supp [file elife-30496-supp-v1.zip › elife_poa_e30496_Figure_7_figure_supplement_1.pdf]

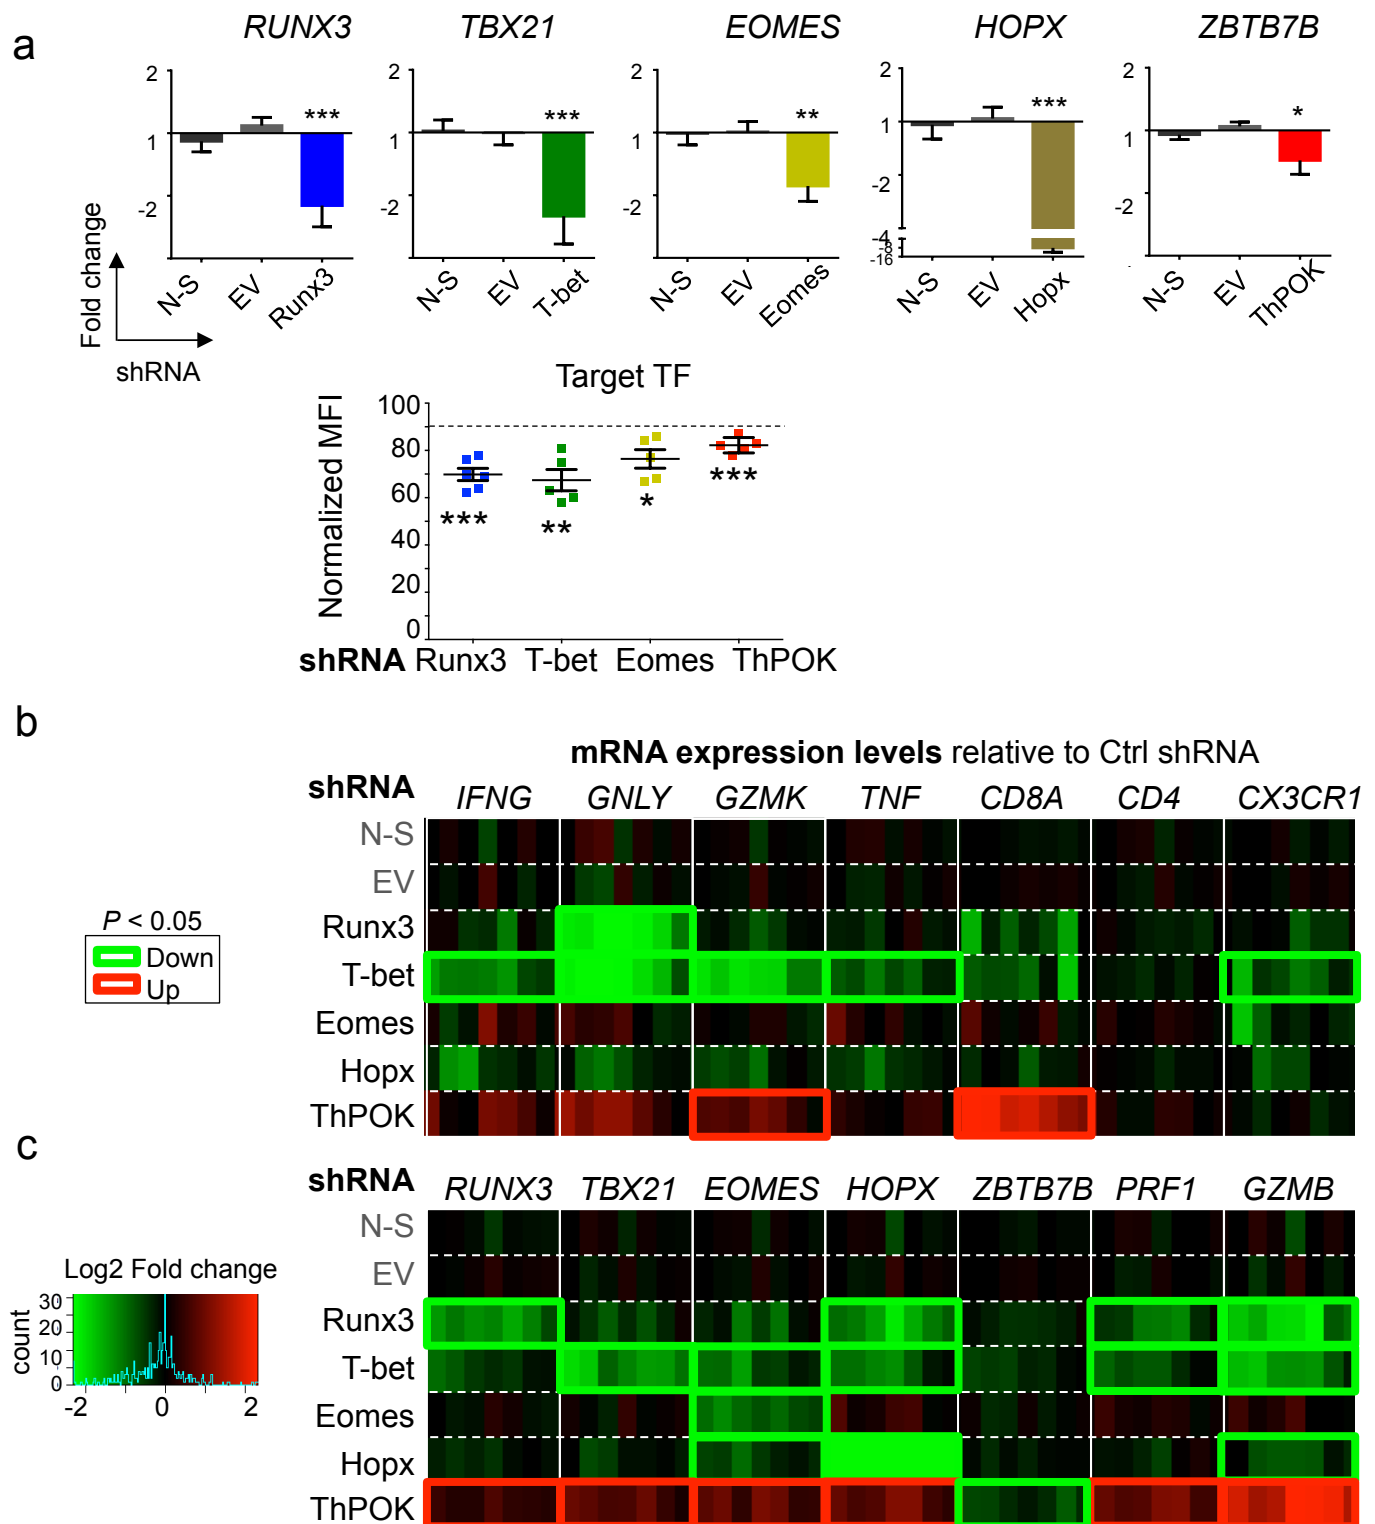

**Figure 7-figure supplement 1. Knockdown of transcription factors (TF) expression by shRNA.** Specific shRNA were used to knockdown the expression of candidate TF by *in vitro* differentiated Th1 cells. **a)** qPCR and flow cytometry analyses of the expression of TF, effector molecules and receptors. qPCR data are mean $\pm$  SD fold change as compared to controls (mean of non-silencing (N-S) shRNA and empty vector (EV)) of 7 biological replicates from 4 independent experiments). Flow cytometry data are mean  $\pm$  SEM of normalized median fluorescence intensity (MFI) as compared to N-S shRNA from 7 independent experiments. Experiments in which less than 10% knockdown was achieved for Runx3, T-bet and Eomes were excluded from the analysis. \*:p<0.05; \*\*:p<0.01; \*\*\*:p<0.001. Results show effective knockdown of target TF. **b-c)** Heatmaps of mRNA expression levels show that T-bet knockdown increases the expression of *IFNG*, *GNLY*, *GZMK*, *TNF* and *CX3CR1*; Runx3 knockdown increases the expression of *GNLY*; ThPOK knockdown increases the expression of *GZMK*, *CD8A* and all other target TF. In contrast, N-S shRNA and EV transduction did not affect expression of any analyzed mRNA.
