# Supplementary material for: The transcription factors Runx3 and ThPOK cross-regulate acquisition of cytotoxic function by human Th1 lymphocytes
Source: eLife journal article supplement (doi:10.7554/elife.30496), 2018-02-28
Supplement: supp [file elife-30496-supp-v1.zip › elife_poa_e30496_Figure_7_source_data_1.xlsx]

## Sheet: Figure 7
Figure 7-source data 1. TF controlling the expression of perforin in CD4 T cells.
Figure 7b. mRNA expression measured by qPCR. Fold Change.
PRF1
shRNA	Non silencing	Empty vector	HOPX 00	Runx3 42	Eomes 86	T-bet 05	ThPOK 13
	1	1	0.889	0.737	1.424	0.529	1.879
	1.175	0.825	0.909	0.699	1.143	0.625	1.627
	1.151	0.849	0.814	0.481	1.112	0.576	1.697
	0.842	1.158	0.674	0.47	1.259	0.579	2.176
	0.993	1.007	1.042	0.429	1.197	0.768	2.235
	1	1	1.181	0.763	0.94	0.966	1.495
	1.094	0.914	1.028	1.064	1.079	0.966	1.495
GZMB
shRNA	Non silencing	Empty vector	HOPX 00	Runx3 42	Eomes 86	T-bet 05	ThPOK 13
	1	1	1	0.293	1.464	0.312	3.732
	1.267	0.733	0.621	0.347	1.111	0.289	2.697
	1.073	0.927	0.583	0.254	1.232	0.404	3.034
	0.633	1.367	0.575	0.25	1.548	0.412	6.412
	1.021	0.979	0.59	0.207	1.021	0.392	4.89
	1.173	0.853	0.889	0.578	1.021	0.59	4.563
	1.003	0.997	0.76	0.502	0.976	0.856	2.979
Figure 7d. Normalized perforin protein expression (MFI)
shRNA	N-S	Runx3	T-bet	Eomes	Hopx	ThPOK
tube ID
220 2016	100	56	57	104,000*	103	155
220 2016 tube 2*	100,000*	56,000*	61,000*	126,000*	125,000*	245,000*
535 2016	100	79	109,000*	100	106	140
535 2016 tube 2*	100,000*					193,000*
464 2016	100	71	75	93	80	156
464 2016 tube 2*	100,000*	64,000*	78,000*	92,000*	76,000*	163,000*
510 2016	100	80	90	87	97	142
510 2016 tube 2*	100,000*	78,000*	91,000*	85,000*	82,000*	153,000*
151 J15 tube 1	100	96	92	96	97	112,000*
151 J15 tube 2*	100,000*	90,000*	84,000*	90,000*	91,000*	99,000*
151 J14*	100,000*	106,000*	104,000*	112,000*	97,000*	101,000*
120 tube 1	100	73	91	83	86	126
120 tube 2*	100,000*					185,000*
220 tube 1	100	101,000*	116	99	104	157
220 tube 2*	100,000*
Figure 7e. % lysis
shRNA	NS					Tbet05					Runx3 42					ThPOK13
E-T ratio
1-1	4.363	3.19	6.58	3.37	0.83	2.113	2.76	3.46	0.82	1.25	2.623	1.68	1.79	3.18	0.76	9.653	9.26	4.88	5.11	0.66
5-1	11.453	17.06	11.38	13.49	4.99	7.493	10.26	11.08	5.84	4.48	3.273	4.56	5.08	8.89	5.23	22.953	26.86	16.98	28.09	19.69
10-1	15.653	18.36	15.58	53.89	9.89	8.183	19.36	17.78	48.29	26.49	14.353	10.46	13.18	27.89	5.37	26.753	41.46	28.58	59.39	21.69
Figure 7g. Normalized protein expression (MFI) in cells transduced with ThPOK-targeting shRNA.
	N-S	Runx3	T-bet	Eomes	CD8a	CD4
220 2016	100	135	147,000*	140,000*		95
220 2016 tube 2	100		133	130
535 2016	100	98	92,000*	94,000*	62,*	66,*
535 2016 tube 2	100		105	137	161	86
464 2016	100	124	124,000*	117,000*	162,*	82,*
464 2016 tube 2	100		133	178	178	74
510 2016	100	114	107,000*	109,000*	132,*	91,*
510 2016 tube 2	100		109	109	146	95
120 tube 1	100	103	89,000*	106,000*	106,*	118,*
120 tube 2	100		122	123	131	104
220 tube 1*	100,*	112,000*	110,000*	110,000*	122,*	87,*
220 tube 2*	100,*		159,000*	157,000*	251,*	75,*
