# Supplementary material for: The transcription factors Runx3 and ThPOK cross-regulate acquisition of cytotoxic function by human Th1 lymphocytes
Source: eLife journal article supplement (doi:10.7554/elife.30496), 2018-02-28
Supplement: supp [file elife-30496-supp-v1.zip › elife_poa_e30496_Supplementary_File_1.xls]

## Sheet: All_GeneLists
Supplementary File 1. Lists of genes included in the 12 GeneSets obtained from CD4 versus CD8 T cell comparison (Figure 2) and naive CD4 T cell versus CMTh1 cell versus CD4CTX T cell comparison (Figure 4). Genes expressed at higher level by the first listed subset as compared to the subset indicated between brackets were identified using the min/max method. Genes are ranked according to mean log2…
NaiveCD4 (NaiveCD8)		NaiveCD8 (NaiveCD4)		NaiveCD4 (CD4CTX)		CD4CTX (NaiveCD4)		NaiveCD8 (CD8CTX)		CD8CTX (NaiveCD8)		CD4CTX (CD8CTX)		CD8CTX (CD4CTX)		NaiveCD4 (Th1)		Th1 (NaiveCD4)		Th1 (CD4CTX)		CD4CTX (Th1)
Symbol	log2 FC	Symbol	log2 FC	Symbol	log2 FC	Symbol	log2 FC	Symbol	log2 FC	Symbol	log2 FC	Symbol	log2 FC	Symbol	log2 FC	Symbol	log2 FC	Symbol	log2 FC	Symbol	log2 FC	Symbol	log2 FC
ANKRD55	2.64573	CD8A	4.82867	CCR7	5.7139	GZMH	6.43987	CCR7	5.0346	GPR56	4.52089	CD40LG	2.1611	CD8A	4.59607	ACTN1	2.31364	GZMK	4.80353	CCR7	4.21562	FGFBP2	4.33233
FLJ11795	2.54816	NR4A2	3.12948	MAL	5.09369	FGFBP2	5.81388	MAL	4.54252	FGFBP2	4.49139	CD4	2.00515	SLC7A5	2.61818	LRRN3	2.2592	CCL5	4.10173	GZMK	4.15918	GPR56	4.09936
TSHZ2	1.99552	CCL5	3.09301	NELL2	4.10055	NKG7	5.803	NELL2	4.32159	GZMB	4.43588	IL7R	1.77367	CSDA	2.60657	AIF1	2.21492	GZMA	3.86299	CD27	4.15816	GZMB	4.02727
MYC	1.904	GZMK	2.84327	CD27	4.06439	GPR56	5.45173	CD27	3.79158	GZMH	4.33624	PRDM1	1.56765	GZMK	2.60438	LOC653316	2.11259	KLRB1	3.66359	MAL	3.93023	ZNF683	3.74376
CD40LG	1.76054	CSDA	2.82094	LRRN3	3.64544	CCL5	5.247	CD248	3.3439	ZNF683	3.76458	CTLA4	1.42539	KLRC3	2.58715	PCSK5	2.09103	ADAM19	3.42222	LTB	3.16078	S1PR5	3.52602
CYSLTR1	1.73339	CD248	2.67771	TCEA3	3.55453	GZMB	5.08045	PASK	3.30306	GNLY	3.70188	LOC642233	1.39905	GABARAPL1	2.24793	TCEA3	2.06979	FAM46C	3.29512	NELL2	2.57921	GNLY	3.35945
CD4	1.6969	CD8B	2.64792	ACTN1	3.15637	GZMA	5.0791	ACTN1	3.30018	PRF1	3.55487	CX3CR1	1.37702	CD8B	2.2413	LOC202134	2.02213	LGALS1	3.19233	EBI2	2.54823	GZMH	3.30769
ARID5B	1.66386	NKG7	2.63235	LEF1	3.09731	ZNF683	4.91173	LEF1	3.25	TGFBR3	3.49686	SLAMF1	1.36878	KLRD1	1.84258	EDAR	2.00941	GZMH	3.13217	MFGE8	2.40467	ASCL2	3.10681
GIMAP5	1.65177	TIPARP	2.35181	MYC	3.06116	GNLY	4.9096	TCEA3	3.07923	LGALS1	3.42413	LOC644846	1.35262	SMAD7	1.71123	SNORA12	1.84096	FAM129A	3.06292	TSPAN18	2.24497	FGR	3.09304
TNFSF10	1.52779	GADD45A	2.32599	LOC653316	3.04054	PLEK	4.80821	LTB	2.97003	S1PR5	3.4024	GIMAP5	1.11401	ZNF331	1.65152	EPHX2	1.82586	NKG7	2.87341	CMTM8	2.16617	CX3CR1	2.99459
TSPAN18	1.52578	GZMH	2.08758	CMTM8	3.00116	PRF1	4.62868	LOC653737	2.96286	HOPX	3.39437	ITM2C	1.11196	RBM38	1.60909	ANKRD55	1.7623	CST7	2.82933	SUSD3	2.05675	NKG7	2.92958
AP3M2	1.47258	SLC7A5	2.06013	LTB	2.9951	S1PR5	4.48507	LRRN3	2.86694	KLRD1	3.33276	FLJ14213	1.09042	SIK1	1.56693	ELA1	1.75397	SYT11	2.78598	ADAM19	2.03728	PRF1	2.90504
TPM2	1.47113	AVPI1	2.03876	CACNA1I	2.96143	CST7	4.34533	SPINT2	2.8632	PLEK	3.26015	GIMAP6	1.04269	MAFF	1.52187	PTK2	1.74015	HOPX	2.63334	PASK	2.00256	PRSS23	2.88859
GIMAP7	1.45676	GJC2	1.9582	EPHX2	2.95554	CX3CR1	3.96065	LYPD3	2.62225	NKG7	3.23889	GIMAP8	1.02182	JMJD6	1.44852	MGC18216	1.72227	STOM	2.60439	CD28	2.00107	PROK2	2.8212
NPCDR1	1.44176	MIDN	1.91614	ANKRD55	2.86763	LOC728835	3.89946	IRS2	2.57324	CST7	3.19355	TMEM14C	1.01978	AXUD1	1.38336	PRAGMIN	1.6902	PLEK	2.55115	PI16	1.99426	LOC728835	2.74476
CACNA1I	1.42433	GABARAPL1	1.84207	SELL	2.81855	LGALS1	3.89926	MGC33556	2.49979	KLRB1	3.19171	HSPA1A	1.01914	PLCG2	1.38172	FLJ11795	1.68726	E2F2	2.54538	FAM102A	1.97087	ADRB2	2.74068
SLC40A1	1.36424	IRS2	1.7614	FLJ11795	2.80587	BHLHB2	3.84408	SELL	2.42795	PRSS23	3.16146	IFNG	1.00114	CDKN1A	1.37912	DENND5A	1.61155	CXCR3	2.50527	SGK	1.95915	ITGAM	2.7095
TRAT1	1.33218	AXUD1	1.75243	PRKCA	2.73636	ADRB2	3.80979	AIF1	2.42415	EFHD2	3.09039	DNCL1	0.927047	CD7	1.34206	LASS6	1.56498	LOC730415	2.40375	LEF1	1.89916	LYN	2.48602
EDAR	1.32591	CTSW	1.74966	DENND5A	2.6352	TGFBR3	3.79737	LOC729402	2.41638	BHLHB2	3.0861	PRAGMIN	0.902633	PDE4B	1.31642	IFNGR2	1.56406	ITGB1	2.37309	CACNA1I	1.88947	CENTG2	2.4069
KIAA0907	1.26784	CXCL16	1.72309	MGC33556	2.62403	FGR	3.78925	LASS6	2.32571	ASCL2	3.05662	RAB10	0.864642	LAG3	1.19464	RNF144	1.54026	MIAT	2.37289	KIAA0101	1.86754	ZEB2	2.35247
TIAM1	1.2671	CD79A	1.68375	DGKA	2.61961	PLEKHG3	3.78713	EPHX2	2.32191	PROK2	3.04592	PLAC8	0.862229	KLRC2	1.18091	SERPINE2	1.52137	DUSP2	2.3435	MYC	1.86501	KLRD1	2.33889
PDE7A	1.24993	BHLHB2	1.68037	VIPR1	2.59887	KLRB1	3.68115	LOC439949	2.31073	TTC38	3.01264	GIMAP7	0.854498	PECAM1	1.172	NELL2	1.52133	NINJ2	2.30122	SGPP2	1.85403	GPR114	2.32338
AXIN2	1.2369	DUSP2	1.65939	AXIN2	2.42336	ASCL2	3.5607	VIPR1	2.29621	LOC728835	2.93194	MRPS31	0.840289	TP53INP2	1.1692	CCR7	1.49828	DUSP5	2.27294	DGKA	1.84909	TTC38	2.268
MAP3K1	1.21719	LOC729402	1.65541	EBI2	2.42193	STOM	3.55234	SGK	2.24145	ADRB2	2.9301	ZMYM6	0.825882	LOC440359	1.13464	BACH2	1.47064	EOMES	2.23369	JUNB	1.81658	PLEK	2.25706
CSAD	1.16317	VPS37B	1.64705	TSHZ2	2.41263	SYT11	3.50656	FOS	2.23383	CENTG2	2.89223	CTSB	0.807051	LOC100129267	1.09698	FAM117B	1.43636	PLEKHG3	2.22868	LY96	1.73167	EFHD2	2.13652
PIM1	1.14325	KLRC3	1.62053	TSPAN18	2.38349	PROK2	3.48619	PADI4	2.23179	GZMA	2.88217	GNPDA1	0.803544	DUSP10	1.07518	PRKCA	1.43628	IL2RB	2.19677	ADCY3	1.67422	TGFBR3	2.10434
DACT1	1.13915	PFKFB3	1.60841	PCSK5	2.30374	EFHD2	3.47819	CD79A	2.20716	FGR	2.81866	STAT1	0.794052	VPS37B	1.06256	CHD7	1.42722	ANXA2P1	2.18621	IL11RA	1.6487	FLJ20699	2.09312
CTLA4	1.13502	GPR132	1.5987	TXK	2.29144	EOMES	3.42113	DENND5A	2.19538	ITGAM	2.72454	ZNF319	0.774223	TUBA4A	1.05263	NET1	1.4182	IFNG	2.18301	RNF214	1.645	MYBL1	2.03908
LOC642035	1.13153	FCGBP	1.54688	KRT72	2.2827	LAIR2	3.36462	PRKCA	2.14396	PLEKHG3	2.71474	DYNLL1	0.757436	CASZ1	1.02175	VIPR1	1.4026	MCOLN2	2.18245	LRRN3	1.64454	FCRL6	1.9883
P2RY5	1.12242	RNF125	1.49618	GRAP	2.2754	CENTG2	3.29536	LOC202134	2.08941	ANXA2	2.7001	TNFAIP8	0.725515	GADD45B	0.996439	TXK	1.39657	KIAA0101	2.15558	CRIP2	1.63901	CES1	1.90338
IL11RA	1.09707	PASK	1.48563	MFGE8	2.26982	FLJ14213	3.20371	IL7R	2.0405	FLJ20699	2.68752	ARHGEF3	0.723692	FAM177A1	0.992633	DSC1	1.39438	BHLHB2	2.11432	GRAP	1.58195	CTSW	1.89128
TNFRSF10A	1.09171	NT5E	1.48438	LASS6	2.26802	ITGAM	3.19416	FAM117B	2.0359	GARNL4	2.66601	MKKS	0.692669	RBM39	0.983383	PDE7A	1.36533	TNFRSF1B	2.10342	NOSIP	1.57644	CST3	1.88989
GOLGA8B	1.06678	FAM173A	1.48275	MAN1C1	2.2365	PRSS23	3.15424	TXK	2.03302	CX3CR1	2.58909	CASP2	0.653469	SPATA2L	0.981924	KBTBD11	1.36504	MAF	2.00757	TYMS	1.56297	ID2	1.88158
BIRC3	1.03911	GADD45B	1.47817	SLC24A6	2.23211	MYBL1	3.11661	SUSD3	2.02203	FAM129A	2.57563	PSMA5	0.640261	MIDN	0.978211	KRT73	1.34894	HLA-DPA1	2.00593	TBC1D4	1.53894	CLDND2	1.83843
METTL3	1.03352	SMAD7	1.46993	SGK	2.20497	IL18RAP	3.08771	LOC100008589	2.01883	LAIR2	2.52639	KIAA0907	0.63839	DNAJB1	0.970367	TSHZ2	1.34166	CDCA7	1.98978	CTLA4	1.53082	TARP	1.81589
GIMAP8	1.03227	IL2RB	1.45821	NOSIP	2.18292	FAM129A	3.06875	SNN	1.96349	LYN	2.50304	ST8SIA4	0.629179	GADD45A	0.963016	SLC40A1	1.33833	AUTS2	1.97594	TRIB1	1.52122	BHLHB2	1.72976
EMR4P	1.02938	LOC653506	1.45385	EDAR	2.14168	ITGB1	3.00018	NOSIP	1.95167	ITGB1	2.47851	CMKLR1	0.616249	GPR132	0.947399	DBNDD1	1.33475	LOC730278	1.97532	IL6R	1.51586	CCL5	1.72436
TRIB2	1.02483	PDE4D	1.44927	FHIT	2.13467	LOC387882	2.9919	SLC24A6	1.92886	STOM	2.44575	METTL13	0.612558	BCL3	0.946362	SELL	1.3316	CD58	1.96934	ICOS	1.50803	PALLD	1.71969
PTK2	1.01839	IDI1	1.4432	KBTBD11	2.12581	HOPX	2.94969	CMTM8	1.91685	LOC730415	2.39197	G3BP1	0.603435	YPEL5	0.933337	MAN1C1	1.31692	HNRPLL	1.94106	SELL	1.48695	CCL4L2	1.71299
CTSB	1.00207	CDKN1A	1.41896	ZSCAN18	2.07865	GPR114	2.85171	LOC653316	1.90975	EOMES	2.3812	IL27RA	0.598379	STK17B	0.928311	LOC100131662	1.29938	LAIR2	1.92603	TCEA3	1.48473	RAP2A	1.70958
CROP	1.00136	HLA-DOA	1.39919	SPINT2	2.07084	B4GALT5	2.81514	KBTBD11	1.89502	JAZF1	2.36918	OAS2	0.580875	BHLHB2	0.922402	SCML1	1.28925	LOC642233	1.90718	CORO1B	1.48445	PDZD4	1.69963
GIMAP6	0.994879	SYT11	1.38372	PASK	2.06649	MIAT	2.77445	GJC2	1.88487	PDZD4	2.35109	COMMD3	0.566236	NELF	0.916142	GAL3ST4	1.27773	LGALS3	1.90019	COTL1	1.46875	CACNA2D2	1.69703
PRDM1	0.990408	LOC440359	1.36267	CD7	2.0544	FAM46C	2.72104	MGC15763	1.88268	MYBL1	2.3291	MGST2	0.56588	IRF2BP2	0.897572	RNF144A	1.27677	HLA-DRB6	1.89586	FAIM3	1.44942	OSBPL5	1.6582
NSUN5C	0.989762	LYAR	1.33989	LOC439949	2.04973	HLA-DPA1	2.67866	MFGE8	1.8792	CCL5	2.31392	C1GALT1C1	0.530522	CCNH	0.896279	FLNB	1.25886	ACTA2	1.89475	TNFRSF4	1.43369	B4GALT5	1.6472
B4GALT4	0.97203	RAB33A	1.33816	RAB3GAP1	2.02405	TTC38	2.67739	BEX2	1.8762	TARP	2.29179	FAM69A	0.49201	SLA2	0.893482	DKFZp761P0423	1.25235	S100A4	1.89431	MGC33556	1.42751	FLJ14213	1.59923
FBLN7	0.961462	FGFBP2	1.33811	BEXL1	1.99756	ZEB2	2.66727	SH3YL1	1.87007	TNFRSF1B	2.26794	TEX2	0.481073	PTS	0.872225	ACSS2	1.24285	GNLY	1.88665	BIRC3	1.40372	PATL2	1.5941
AHSA2	0.959749	HOPX	1.31038	SLC40A1	1.99403	NCALD	2.61501	ZSCAN18	1.85123	PYHIN1	2.23915	IL16	0.479613	MOAP1	0.847128	NME4	1.23796	LOC387882	1.88152	CXCR5	1.39881	SUSD1	1.5935
CTSL1	0.956718	ALG13	1.26955	SUSD3	1.98533	KLRD1	2.58585	NGFRAP1	1.84032	LOC387882	2.22305	TMEM126B	0.468896	TSPYL2	0.840677	FAM113B	1.23	PTTG3P	1.8615	CNTNAP1	1.3929	SLC15A4	1.57912
NUP43	0.951735	FBLN2	1.2695	NGFRAP1	1.96642	LOC730415	2.5814	GRAP	1.83046	FCRL6	2.21564	USO1	0.462861	PAPD5	0.832942	LOC100132247	1.22596	PPP2R2B	1.85768	LRIG1	1.39258	HOPX	1.57503
LIMS1	0.929435	PDE4B	1.26357	KLHL3	1.93352	LYN	2.57859	PCSK5	1.82664	CES1	2.21078	CBR4	0.462851	VCAM1	0.82976	MGC15763	1.21283	PTTG1	1.82619	TOP2A	1.38067	SERPINB6	1.56979
CITED2	0.925787	LOC653171	1.24033	NET1	1.92759	TARP	2.56642	BTBD11	1.82153	CD300A	2.20513	RBM14	0.460058	CSNK1D	0.819866	ATM	1.21254	TUBA1C	1.82236	CDC20	1.37048	PLEKHG3	1.55845
STAMBPL1	0.925063	NRCAM	1.23663	ELA1	1.91675	RAP2A	2.55631	SGK1	1.78339	LAG3	2.2045	SNX27	0.430276	ZC3H12A	0.819233	LTBP3	1.21095	CHST7	1.81852	INPP4B	1.36654	JAZF1	1.55566
LPIN2	0.882051	LOC731878	1.21894	FAM134B	1.91655	LOC653506	2.53366	ELA1	1.75749	AUTS2	2.19977	CISD1	0.422011	SYAP1	0.813506	SATB1	1.20705	PRDM1	1.818	MEGF6	1.36629	PTGDS	1.54131
CD69	0.881836	LOC728098	1.21687	MEGF6	1.90724	TNFRSF1B	2.49972	RPL12P6	1.75239	LOC653506	2.18003	DPYD	0.404588	LOC651816	0.797851	RAPGEF6	1.2058	S100A11	1.78643	GPR183	1.36112	MATK	1.53094
DBNDD1	0.881046	TPST2	1.20415	BEX2	1.90675	CTSW	2.45253	MMD	1.74965	ENC1	2.12004	CLNS1A	0.366595	SFRS2	0.797454	LEF1	1.19815	FCRL3	1.78439	CLDND1	1.3572	ENPP4	1.52113
LRCH4	0.879297	JMJD6	1.19498	SERPINE2	1.89322	MCOLN2	2.44006	SERPINE2	1.74962	HLA-DPA1	2.11795			LOC643167	0.778407	MGC33556	1.19653	GLIPR1	1.78426	SGK1	1.34752	CD300A	1.51775
AMY2A	0.858642	MMD	1.19445	LOC202134	1.85261	IL2RB	2.39482	TMEM123	1.73994	PLEKHF1	2.11011			DDX24	0.765821	MMP28	1.19273	MGC4677	1.78404	CCR2	1.34391	CST7	1.516
CHMP7	0.850565	KLRD1	1.15423	MGC15763	1.85092	CD300A	2.37344	PDE3B	1.72832	ACTN4	2.08894			LDHA	0.761912	DACT1	1.1861	NCRNA00152	1.78093	LGALS3	1.34037	LOC653506	1.51416
MKKS	0.848049	REG4	1.15065	LOC100131662	1.85022	PPP2R2B	2.33918	PHGDH	1.72621	F2R	2.0866			SELK	0.759663	IL4R	1.17221	CLIC1	1.77585	LDHB	1.33337	KLRG1	1.49761
HKDC1	0.84781	NKX3-1	1.13755	JUNB	1.84815	CES1	2.3357	DSC1	1.72331	GPR114	2.05445			LOC653171	0.74855	LOC645630	1.16411	TYMS	1.77542	AXIN2	1.33301	SETBP1	1.46963
ADD3	0.847399	DNAJB6	1.13125	PTK2	1.84702	TPST2	2.33476	FAM134B	1.71913	ZEB2	2.04447			AKIRIN1	0.73266	MAL	1.16346	GBP5	1.75646	LIMS1	1.33047	CEBPA	1.4668
TRAF3IP3	0.839859	ATP1B3	1.13073	SH3YL1	1.83712	KLRG1	2.32886	FCGBP	1.7018	MYO1F	2.02488			CEBPZ	0.731139	FAM134B	1.15812	LYAR	1.74356	LOC642161	1.32962	LOC731007	1.46369
OAS2	0.838706	DBN1	1.12166	FAIM3	1.81132	FLJ20699	2.32721	GADD45A	1.69334	CD99	1.99107			KLRA1	0.730805	LOC642035	1.1569	LOC644846	1.74102	CXCR3	1.32954	MXRA7	1.46297
PRDM8	0.82876	FAM177A1	1.11584	GAL3ST4	1.80468	APOBEC3G	2.31804	RAB3GAP1	1.69271	RAP2A	1.98094			MGAT4A	0.724406	PDE3B	1.13274	TRIB1	1.72465	UBE2C	1.32214	TTC16	1.45787
ARID4B	0.825882	PRMT10	1.10007	LTBP3	1.7993	AUTS2	2.31699	GTSCR1	1.69121	MCOLN2	1.97713			CCRN4L	0.723641	LOC338799	1.13262	PRF1	1.72364	HAPLN3	1.32166	CAMK2N1	1.43983
SLC16A5	0.815843	PGRMC2	1.08888	IFNGR2	1.78541	CCL4L2	2.30316	ABLIM1	1.68886	SYT11	1.96825			LOC731049	0.721067	SLC22A17	1.13207	TNFRSF4	1.71992	NINJ2	1.32095	MMP23B	1.43702
ACSS2	0.812075	FAM108B1	1.08761	FAM117B	1.78458	RHOU	2.29713	NT5E	1.68697	PPP2R2B	1.96567			SON	0.71881	CITED4	1.12089	SGPP2	1.69407	CCNB2	1.31974	NUAK1	1.43419
KIAA0748	0.802988	NCALD	1.07749	SGK1	1.78339	IFNG	2.28128	MAN1C1	1.63522	FLJ14213	1.96385			PLEKHA2	0.715571	B4GALT4	1.11418	TGFBR3	1.69303	SCARNA9	1.30462	TXNDC3	1.41952
ZNF234	0.797423	PRF1	1.07673	FAM102A	1.77807	F2R	2.27906	FLNB	1.62803	HLA-DRB4	1.94998			CCDC49	0.712032	PECAM1	1.11213	EPSTI1	1.6919	PRKCA	1.30008	FAM46A	1.40874
IL6R	0.797269	RUNX3	1.07416	LDLRAP1	1.77171	JAZF1	2.27413	NFKBIZ	1.62257	HLA-DRB6	1.94792			POFUT2	0.710775	DNAJC30	1.11109	CCR2	1.69127	TRAF3IP2	1.29656	SPON2	1.4059
ZADH2	0.793408	EXOSC6	1.05192	INADL	1.77004	FCRL6	2.22859	DGKA	1.62249	KIR2DL3	1.94351			CBX4	0.709276	BEXL1	1.10782	CRIP1	1.68775	SPINT2	1.2669	PTPN12	1.39184
MARCKSL1	0.792646	RNF138	1.04653	PIK3IP1	1.75758	PDZD4	2.22499	BEXL1	1.60271	CLIC1	1.92537			ARID5A	0.709043	LOC613037	1.10495	HLA-DRA	1.667	ACVR1	1.26382	PLOD1	1.38981
ZBTB40	0.791776	FBXO32	1.04534	LOC730256	1.74585	ZNF365	2.21213	GPR18	1.59729	KLRG1	1.91844			DYNLL2	0.704958	ZSCAN18	1.10268	CX3CR1	1.66459	CD82	1.24195	CD8A	1.38296
BRDG1	0.790518	LOC389293	1.04302	KIAA0748	1.74223	PYHIN1	2.18522	SC5DL	1.58669	CLIC3	1.90647			NXF1	0.699855	FAM153B	1.09766	IL18RAP	1.63825	PKIA	1.24149	NFIL3	1.37994
TMEM173	0.772238	ISCA1L	1.02892	SOCS3	1.74165	KIR2DL3	2.17683	KRT73	1.58338	KLRF1	1.9038			IL21R	0.691151	EPHA1	1.09327	LAG3	1.60965	MAP3K1	1.23953	RHBDF2	1.37247
LOC654096	0.769171	FAM125B	1.0276	TBC1D4	1.72882	LOC642233	2.17533	RGS10	1.58117	CASZ1	1.90118			IFRD1	0.684111	SNORD104	1.09226	ANXA5	1.60561	LOC100188949	1.22947	RASSF1	1.3611
LOC221442	0.764074	CCDC57	1.02572	NFKBIZ	1.72439	CLDND2	2.16539	IMPDH2	1.57367	SUSD1	1.90009			STX11	0.681055	AXIN2	1.09035	FLJ14213	1.60449	RCAN3	1.22475	FNDC3B	1.35509
LOC100233209	0.760772	LOC731049	1.02152	FLNB	1.71888	CLIC3	2.1588	CXCL16	1.56005	DUSP5	1.88662			ANAPC1	0.67901	PPFIBP2	1.08808	ECGF1	1.59993	CENPM	1.21992	SYTL2	1.35191
GIMAP1	0.749353	MTP18	1.01086	GTSCR1	1.71819	MYO1F	2.15868	AMICA1	1.55839	LOC197135	1.87813			MED26	0.678379	RBMS1	1.08458	HLA-DRB4	1.59276	CCR4	1.21137	METRNL	1.34866
MFHAS1	0.741357	SEPT11	0.998116	FAM113B	1.69555	MGC4677	2.15348	LOC727820	1.55035	SETBP1	1.87723			RNF138	0.669432	ZNF395	1.08288	CLDND1	1.59073	TIAM1	1.20931	RAB11FIP5	1.34318
MRI1	0.740753	MAFF	0.99238	SNORD104	1.6953	ACTN4	2.14962	ZSWIM1	1.54441	LOC649143	1.8643			SURF4	0.667044	APBA2	1.07275	YWHAH	1.58404	SLC24A6	1.20485	GK5	1.32613
GABBR1	0.739634	NXT1	0.989619	NPCDR1	1.65348	S100A4	2.14957	NET1	1.54106	APOBEC3G	1.84632			IDS	0.652068	CACNA1I	1.07196	ACTN4	1.58338	TNFRSF10A	1.20347	SOX13	1.30527
TTC14	0.73913	CSNK1D	0.970337	BACH2	1.65345	RHOC	2.13449	ITGA6	1.53768	OASL	1.84372			NR1D2	0.634086	CDK5R1	1.07135	AIM2	1.57558	CCR6	1.20344	AGPAT4	1.30367
SMAD3	0.738898	MT1F	0.951039	LOC642035	1.64404	CLIC1	2.12165	CLEC2D	1.52556	METRNL	1.84105			GZF1	0.612634	TARDBP	1.0707	IL32	1.57304	BEX2	1.19713	ABI3	1.28453
ZRANB2	0.733169	METRNL	0.938667	ACSS2	1.62546	PAM	2.11369	LOC441743	1.50758	MIAT	1.82254			TSEN54	0.606489	SOX8	1.06836	CKS2	1.56303	VIPR1	1.19627	CD320	1.25317
EPHB6	0.72267	PRR5	0.930574	AIF1	1.62397	ANXA2P1	2.11272	BEND5	1.5039	FAM179A	1.80171			SKP1	0.602043	NUCB2	1.06436	IL10RA	1.555	SIRPG	1.19565	FGL2	1.24226
SNX26	0.722358	RELL1	0.929252	PLD6	1.61822	CD58	2.08906	MGC87895	1.50319	CACNA2D2	1.79562			FBXL11	0.600511	CD55	1.06093	ANXA2	1.54763	STS-1	1.19475	ABHD7	1.23552
DNCL1	0.713148	RNMTL1	0.927462	DBNDD1	1.61678	HLA-DRB6	2.06378	SCML1	1.4984	PRDM1	1.78558			PRC1	0.5955	LMTK3	1.05835	PMAIP1	1.53119	GINS2	1.19271	PPP2R2B	1.23283
IFNAR2	0.706547	NCR3	0.926225	IL6R	1.6077	RUNX3	2.03697	RHOH	1.49298	CLDND2	1.78482			LOC285074	0.586293	NGFRAP1	1.05495	CARHSP1	1.52539	LOC202134	1.1843	CLIC3	1.21912
RCBTB2	0.706244	WTAP	0.925726	LRCH4	1.60724	MATK	2.03194	RPL14	1.48746	S100A4	1.76996			SLC1A4	0.580616	PADI4	1.051	NCALD	1.50658	NUSAP1	1.18133	SLC27A3	1.21801
PLEKHA1	0.705428	KLF11	0.915255	ABLIM1	1.60479	FGL2	2.0202	PRAGMIN	1.48652	CCL4L2	1.76895			BRWD1	0.578439	NR3C2	1.04558	APOBEC3H	1.50462	NGFRAP1	1.17306	GZMA	1.21611
GRPEL2	0.702352	PAG1	0.906739	LOC645630	1.60289	LOC644846	2.0137	LY96	1.4758	HRASLS3	1.75753			DBN1	0.576203	DGKD	1.03432	FAM38A	1.50034	CARHSP1	1.15172	CHST12	1.21597
TMEM45B	0.69659	PLEKHF1	0.905393	MGC18216	1.60203	SUSD1	2.01087	ZNF101	1.47074	NPC1	1.75633			UBAP1	0.57459	CDH23	1.03347	FGFBP2	1.48155	LOC388564	1.14319	B3GAT1	1.20852
MTMR10	0.695813	FCER1G	0.902811	PIM2	1.60164	CST3	2.01077	CKAP4	1.46523	MMP23B	1.75422			GPATCH3	0.569296	LRCH4	1.03237	TOP2A	1.48142	RGPD1	1.13796	GFI1	1.18761
TNFRSF25	0.695545	PTS	0.901284	RAPGEF6	1.60139	GARNL4	2.01009	IFNGR2	1.46295	HOXC4	1.75155			RABGGTB	0.568105	ARMCX2	1.02876	ALOX5AP	1.46865	EPHX2	1.12968	EOMES	1.18744
MRPS31	0.695285	SEC14L2	0.891639	SOX8	1.59374	LYAR	2.00678	PIM2	1.46156	CD58	1.74537			BCL7B	0.562637	SLC24A6	1.02726	S100A10	1.46659	INADL	1.12964	LOC100132395	1.18338
ICAM2	0.693523	WDR74	0.883675	SLC7A6	1.57506	TESC	1.97965	LOC730256	1.46097	LDLR	1.74033			BRMS1L	0.558993	LOC400652	1.02307	RHOU	1.46547	RAB3GAP1	1.1267	F2R	1.18318
FBXL16	0.691225	CARS	0.88179	SNORA12	1.55161	HRASLS3	1.97787	CACNA1I	1.45711	ATP2B4	1.72856			SUPT5H	0.555923	PLEKHB1	1.02156	MYO1F	1.4566	FVT1	1.12658	MAP3K8	1.17832
SFRS1	0.688574	NDNL2	0.877569	DHRS3	1.54915	CD99	1.97612	AXIN2	1.44955	SERTAD1	1.72481			SNORD68	0.552198	NUAK2	1.01838	APOBEC3G	1.44456	TNFSF10	1.12223	SYTL3	1.17128
TPR	0.676311	SH3BGRL2	0.871298	PDE3B	1.54155	MXRA7	1.97514	FLT3LG	1.44505	SLC15A4	1.72449			LOC100134277	0.544931	RNF157	1.0053	KLRG1	1.43853	FBLN7	1.12026	HOXC4	1.17095
CSGALNACT1	0.667473	NBL1	0.861027	LDHB	1.52034	MAF	1.96715	CD55	1.43659	MYO1G	1.72153			ATXN1L	0.537881	MTMR10	1.00443	BTG3	1.43453	ABCG1	1.11939	RAP1BL	1.16364
SDHAP2	0.66627	BRWD1	0.860803	DSC1	1.51632	MAP3K8	1.96611	EBI2	1.42769	NUAK1	1.71813			ZDHHC7	0.53511	LOC644931	1.00027	FAM160B1	1.43351	FLJ11795	1.11861	GAB3	1.16266
LOC100128060	0.665945	PECAM1	0.856349	TIAM1	1.51226	ID2	1.9481	KIAA0748	1.42555	ANXA1	1.71008			ANKRD37	0.525325	LOC100130298	0.9937	RNF214	1.42859	FBXL16	1.11197	RHOB	1.15649
ZBED5	0.661926	CLEC11A	0.854192	TNFRSF10A	1.50001	CENTA1	1.94724	WDR74	1.42504	PLCG2	1.70607			PGRMC2	0.52289	LOC440353	0.993623	CTLA4	1.42437	ANKRD55	1.10533	TSHZ3	1.13614
H1F0	0.661233	HERPUD1	0.853386	FOXO1	1.49247	SLC15A4	1.94131	RCAN3	1.42261	B4GALT5	1.70585			SLC5A6	0.518743	LOC647436	0.991008	LOC649143	1.42386	IL2RA	1.10421	LOC645442	1.13158
MYPOP	0.652046	CHKA	0.853159	LEPROTL1	1.4918	ANXA2	1.93634	LOC653156	1.42151	GTF3C1	1.6969			PPRC1	0.487414	TGFBR2	0.987738	ATP2B4	1.42258	TNFRSF25	1.09737	VCL	1.12262
ST6GAL1	0.649043	LOC387820	0.84716	ITGA6	1.48676	HLA-DRB4	1.93374	NPM3	1.41988	RAB11FIP5	1.68038			ARL4C	0.47332	SNHG7	0.987152	PYHIN1	1.41592	CDCA5	1.09349	SLC20A1	1.11958
LYSMD4	0.646155	TUBB2A	0.843942	AMICA1	1.48216	CHST12	1.93028	TBC1D4	1.41649	ADAM8	1.67743			EIF4H	0.464421	SREBF1	0.9839	CD99	1.41488	PLD6	1.08939	PLEKHF1	1.1191
PPAPDC2	0.64234	LOC645691	0.835489	PDE7A	1.46936	GPR65	1.92399	TMEM14C	1.40862	MGC4677	1.67651			MNT	0.46221	LOC282997	0.983274	CDC20	1.41182	CD7	1.08865	NCALD	1.10843
DYNLL1	0.64089	G3BP2	0.832909	SNHG7	1.46835	HLA-DRA	1.92203	LOC645630	1.40429	PDGFRB	1.67428			POLR2D	0.458624	TMIGD2	0.981481	SAP30	1.40971	PAG1	1.08864	FEZ1	1.10694
DCAF7	0.638247	PHGDH	0.82937	ZSWIM1	1.46681	ENC1	1.92062	FAM102A	1.40078	RHOC	1.66881			SRGN	0.457821	ABCA1	0.975059	MT1E	1.40955	PIM2	1.08779	PAFAH2	1.10566
TRADD	0.637545	TP53INP2	0.829075	TCF7	1.46504	SAP30	1.89593	PKIA	1.40043	CEP78	1.66695			TERF1	0.456707	HOOK1	0.974976	UBE2C	1.39835	TSHZ2	1.07096	KIAA1671	1.08798
CYB561D1	0.63649	JMY	0.828766	DPP4	1.45183	ENPP4	1.89309	BEX4	1.39553	ITGAL	1.66633			LOC100132418	0.451937	CD7	0.965748	CENPM	1.39569	CDR2	1.06465	ITPRIP	1.08437
TRIM52	0.632251	FOSL2	0.827231	MYB	1.44413	APOBEC3H	1.88193	INADL	1.38867	PATL2	1.66284			FAM102A	0.442353	KIAA0748	0.964984	TXN	1.38484	AMICA1	1.05503	PLAC8	1.08198
APPBP2	0.631815	ABCB1	0.822519	GIMAP5	1.43335	RASSF1	1.8548	SLC7A6	1.38027	TESC	1.64862			CHRAC1	0.432288	LOC728888	0.961291	LOC100188949	1.35931	DISC1	1.05399	SPG3A	1.08141
VPS35	0.626557	PNO1	0.815302	CITED4	1.43001	GFI1	1.84705	LOC730004	1.37622	STX11	1.626			TIMM23	0.397803	LOC440348	0.956706	KIAA1600	1.35721	TRAT1	1.05146	CEP78	1.08059
IL16	0.623845	ETNK1	0.811671	KRT73	1.42896	SLC27A3	1.83995	LOC641849	1.37167	GAB3	1.62594					HIPK2	0.955892	COTL1	1.35586	TACC3	1.04996	GARNL4	1.07728
UPF2	0.620193	RHOH	0.794166	PNPLA7	1.42385	KLRF1	1.83953	MGC18216	1.3559	MXRA7	1.62165					RAB43	0.954432	GPR56	1.35237	ADSL	1.04045	SBK1	1.07664
AHCYL1	0.619438	COQ10B	0.793586	CHMP7	1.41498	PRDM1	1.82789	GRAMD1A	1.35565	AHNAK	1.61917					KLHL3	0.951704	TPST2	1.34947	MX1	1.03519	CENTA1	1.0748
FOXO1	0.618297	KIAA0182	0.791637	RNU1-5	1.41331	FAM179A	1.81845	REG4	1.3548	DPYSL2	1.61767					ZNF302	0.94424	PACSIN1	1.34502	CMTM7	1.03014	PTGDR	1.07124
LOC100132707	0.614394	USP11	0.786281	RGS10	1.413	PTGDS	1.81141	NFKB1	1.35236	MAF	1.61726					BCAS4	0.939883	LOC100133678	1.34479	DUSP16	1.02821	NUP98	1.06756
KIAA0355	0.612844	LITAF	0.785714	EPHA1	1.41165	CTSC	1.8114	HLA-DOA	1.35097	CAMK2N1	1.61567					LPHN1	0.93951	EFHD2	1.34167	CD69	1.02748	KIAA0182	1.06625
IFNGR2	0.611178	PCNT	0.780795	RNF157	1.40917	LOC100133678	1.79672	SLC16A10	1.34961	DOK2	1.61259					LOC440341	0.939448	HERPUD1	1.33511	NFKBIZ	1.02635	GAS7	1.06238
WDR40A	0.609965	GALR2	0.780216	IL11RA	1.40756	PLEKHF1	1.78993	PDE9A	1.34758	SMAD7	1.61024					CLUAP1	0.934783	PAM	1.33353	DENND5A	1.02365	LOC653438	1.05035
KIAA1267	0.608429	MT2A	0.778374	KIAA0355	1.40411	AGPAT4	1.77495	CD28	1.34014	VCL	1.60896					LOC100128060	0.93465	PPP1R16B	1.32227	LMNA	1.01988	LOC643035	1.04943
NECAP2	0.605298	CGRRF1	0.778259	BTBD11	1.40094	YWHAQ	1.76735	LOC346950	1.33959	YPEL1	1.60815					PLAC8	0.932816	CCNB2	1.32011	ABLIM1	1.01299	GZMM	1.04808
ATP1A1	0.604971	ADPRHL2	0.776646	NFKB1	1.39752	ACTA2	1.76292	TNFRSF25	1.33926	FAM46C	1.60587					LOC646942	0.923969	CTNNA1	1.31842	CHST7	0.999092	PSTPIP2	1.03766
COMMD3	0.592518	LOC651816	0.774124	PLEKHB1	1.39385	KIAA1671	1.76099	LDHB	1.32866	CEBPA	1.60254					SEPT6	0.923024	SLAMF1	1.31765	PIK3IP1	0.995353	IGF2R	1.0364
LOC648405	0.591956	CD55	0.770298	ZNF101	1.39355	SAMD3	1.75834	JUNB	1.32683	FAM53B	1.59517					LOC100131541	0.921096	LOC100133583	1.3056	HIST1H1C	0.988435	SIGLECP3	1.03635
SLC4A7	0.590514	PLEKHA2	0.75633	FAM171A1	1.3889	PALLD	1.74282	BACH2	1.32601	CLCF1	1.59317					TTC3	0.919143	MAP1LC3A	1.29676	SLC40A1	0.986657	GNPTAB	1.03473
UBQLN2	0.5895	PTPN4	0.755071	IMPDH2	1.38636	CACNA2D2	1.73596	BCAS4	1.3249	LOC730278	1.5907					ITGA6	0.917325	TP53INP1	1.29621	KLHL3	0.981821	GPR65	1.02037
CXCR7	0.588297	CTH	0.754249	DPEP2	1.38564	KIAA0182	1.73376	DLL1	1.32309	PIK3AP1	1.58301					LOC643870	0.916862	CORO1B	1.29319	LOC389641	0.977512	CMKLR1	1.01764
SLC24A6	0.57981	DYNLL2	0.75379	HOOK1	1.38424	CEP78	1.72809	ZNF518B	1.32106	ANXA2P1	1.57748					GPC2	0.91517	TXNDC17	1.2906	TIGIT	0.976345	RUNX3	1.01685
APAF1	0.579189	SCRN1	0.749836	FBXL16	1.38415	RAB11FIP5	1.72807	NCK2	1.32021	SYTL3	1.56729					CHMP7	0.913449	CNTNAP1	1.27298	ZSCAN18	0.975978	ERBB2	1.01445
GOLGA5	0.576568	PPP2CA	0.748249	SLC22A17	1.36419	CEBPA	1.70695	STS-1	1.31794	CRIP1	1.56045					LOC730256	0.91209	TIMP1	1.27232	ZNF101	0.974421	LOC100133080	1.00896
ETV6	0.576411	IFNGR1	0.742886	SCML1	1.36326	CAMK2N1	1.70604	TGFBR2	1.30766	PARP8	1.54099					TCF7	0.911717	CD74	1.2581	FAM134B	0.963291	STAT4	1.00741
POLR2A	0.570807	ZFAND2A	0.738702	LOC643870	1.36284	NFIL3	1.70522	CCDC57	1.30693	APOBEC3H	1.53979					LOC727821	0.908011	LOC648470	1.25807	FLT3LG	0.963173	UAP1	1.00602
ARHGEF2	0.569857	CKAP4	0.736152	PIM1	1.3592	SETBP1	1.68773	NRCAM	1.29842	HLA-DRB3	1.53577					LOC651309	0.90696	PCNA	1.25069	DPP4	0.961561	SLAMF7	1.00593
RNASEL	0.565036	DBNDD2	0.729555	CD55	1.35911	CD320	1.68515	KLHL3	1.29803	KIAA1671	1.52891					LOC286208	0.905272	STX11	1.24612	RGL4	0.957595	PARP8	0.997572
FAM184A	0.55556	RUNX2	0.729378	PRAGMIN	1.35879	NPC1	1.68349	MYC	1.29545	CHST12	1.52061					NRIP1	0.90524	RHOC	1.24599	STAM	0.955631	RHOQ	0.99501
RAB11FIP1	0.552583	ADNP2	0.72769	BIRC3	1.35505	LOC649143	1.683	CDH23	1.29352	KIR3DL1	1.52039					HSF2	0.902719	ATXN1	1.24546	CCDC109B	0.955573	CCL4	0.994458
RAB3GAP1	0.550387	FAM32A	0.725717	CD28	1.35138	GDPD5	1.67093	LOC645515	1.28654	GBP5	1.52008					RAB3GAP1	0.89735	DOK2	1.24026	FABP5L2	0.954205	ITPRIPL2	0.994219
XPO1	0.541308	FAM116B	0.722731	RNU1G2	1.35083	VCL	1.67003	PIK3IP1	1.28643	FEZ1	1.51868					ZNF91	0.897069	GDPD5	1.23701	MEOX1	0.944338	RHOC	0.986186
STAT1	0.538858	ISCA1	0.721034	IL4R	1.34853	GLIPR1	1.66856	LOC654350	1.2862	CENTA1	1.51852					MEIS3P1	0.888302	FAS	1.23197	IRS2	0.940947	TPST2	0.985297
EMR4	0.53831	TMEM93	0.715743	TMEM204	1.34702	KIR2DL4	1.66441	CCDC109B	1.28287	SAP30	1.50389					HNRPDL	0.887485	ERN1	1.22841	GRAMD1A	0.931395	FAM108A2	0.985164
FYN	0.537727	KPNA2	0.708429	CRTC3	1.34286	MMP23B	1.65327	LOC728791	1.2821	PAM	1.50369					TRIM44	0.886454	MGST2	1.22624	FHIT	0.929425	EIF4G3	0.979981
CD2	0.531657	UBE2L3	0.684303	CHD7	1.34065	SH3BGRL3	1.65105	LOC388344	1.28209	SLC9A3R1	1.50281					BBS2	0.885056	PHACTR2	1.2111	LYL1	0.928323	SAMD3	0.973967
CEACAM1	0.528601	LOC648294	0.682556	PKIA	1.33803	MIDN	1.6493	LEPROTL1	1.27905	KIR2DL4	1.49273					PLEKHA1	0.884525	TUBB2C	1.21007	LOC653316	0.927948	TMEM181	0.968219
GORASP1	0.528355	LOC151579	0.682276	RNU1-3	1.33654	SLC9A3R1	1.63855	CITED4	1.27163	PALLD	1.4881					ARRDC5	0.882507	MYO1G	1.20784	SLC7A6	0.921218	GNG2	0.964529
MLKL	0.524127	LOC100134277	0.680225	TRAT1	1.33565	MYO1G	1.63385	LOC651309	1.26403	TBK1	1.48574					PLAG1	0.881584	TBK1	1.20576	MAN1C1	0.919581	CHN2	0.959162
ZYG11B	0.519995	FEM1A	0.669408	RPL13L	1.32943	HLA-DQA1	1.62895	CCDC106	1.25597	HLA-DQA1	1.47749					EMR4P	0.877485	GALM	1.20163	PBX4	0.914894	SSBP3	0.954946
SYNJ2	0.517711	NUDT15	0.668947	TACC3	1.32702	TUBA1C	1.62515	LOC648659	1.25596	AGPAT4	1.47713					PRPF3	0.876325	CDCA5	1.1992	ZSWIM1	0.908897	LOC729495	0.95455
TMEM194A	0.508382	HCST	0.667506	TNFRSF25	1.31944	ITGAL	1.6228	LDLRAP1	1.25448	SYTL2	1.46616					LOC388556	0.876218	PREX1	1.1973	TECR	0.908369	FRMPD3	0.952677
RASGRP1	0.496715	CENPN	0.664198	LOC282997	1.3184	SERTAD3	1.61542	LOC727970	1.2543	FGL2	1.4646					LOC200030	0.868721	NUSAP1	1.19412	AQP3	0.907137	KIF19	0.952626
ZNF500	0.492779	BZW1	0.659821	TECPR1	1.3057	CTNNA1	1.6069	RPL13	1.25265	GK5	1.46105					AEBP1	0.866808	HMGB2	1.19317	ICAM2	0.907067	STOM	0.94795
SS18L1	0.492638	MASTL	0.658515	LOC642161	1.3044	TBK1	1.60437	CRTC3	1.25165	GFI1	1.45958					ZBED5	0.866768	ANTXR2	1.19048	GCHFR	0.904706	LOC728969	0.946933
TCEA3	0.48703	YTHDF3	0.652119	PHGDH	1.30408	ATP2B4	1.60365	LOC645968	1.24644	TOX	1.44541					LOC643310	0.864005	LMNA	1.18969	CCM2	0.904673	LOC100130000	0.946249
SCARNA13	0.483612	MGC40489	0.650073	CDH23	1.30227	GBP5	1.59725	NARG1L	1.24453	ZNF365	1.4402					ZNF439	0.859475	CCR6	1.18947	PDE4B	0.903063	APOBEC3G	0.940518
KIAA0528	0.481058	SLC25A4	0.643196	SATB1	1.30153	PREX1	1.59354	SOX8	1.24109	GDPD5	1.43813					PDE9A	0.858466	SH3BGRL3	1.1872	SH3PXD2A	0.901823	RAP1B	0.940072
IFFO1	0.480761	NR1D2	0.640847	CDR2	1.30121	IL18R1	1.58573	TMEM204	1.24098	GYG1	1.43302					LOC654103	0.855654	SLC9A3R1	1.17727	TXK	0.89487	LOC644988	0.930921
LOC650737	0.478771	STRAP	0.638399	MAP3K1	1.30015	LOC730278	1.57471	NKX3-1	1.24085	RASSF1	1.43149					TSPAN3	0.854053	BATF	1.16804	MUC1	0.89445	DHRS7	0.928361
TIAF1	0.473671	TRIAP1	0.635701	SIRPG	1.29648	GAB3	1.57253	LOC282997	1.23997	ACTA2	1.42296					LOC341315	0.849849	B4GALT5	1.16794	STAT1	0.893286	IFIT2	0.924029
ZNF319	0.471126	REL	0.634554	BCAS4	1.29482	SOX13	1.56817	PAG1	1.23621	LOC100132395	1.418					LOC285359	0.843727	LOC731049	1.16108	PAFAH1B3	0.891086	PION	0.921682
PAICS	0.470556	FABP5L2	0.634305	PAG1	1.29279	ABI3	1.5666	LOC648294	1.2326	SASH3	1.41612					LOC729236	0.843412	LOC401115	1.16022	VSIG1	0.890791	MSN	0.918837
FAM117A	0.461424	ZNF622	0.63271	FLT3LG	1.29035	YPEL1	1.56365	RAPGEF6	1.23253	FCRL3	1.40802					SLC7A6	0.843313	ZNF365	1.15977	LOC727820	0.883578	FAR1	0.917194
RAB5B	0.44319	TCEAL3	0.631242	LOC727820	1.2892	OSBPL5	1.55636	LOC402677	1.22153	ANXA5	1.40752					PAN2	0.843265	PDCD1	1.15925	HPCAL4	0.883084	FAM108C1	0.912953
EPHA4	0.441896	FAM105A	0.63086	CYSLTR1	1.28361	ABHD7	1.551	FBLN2	1.21826	GAS7	1.39632					SNHG1	0.842244	GINS2	1.15778	SOCS3	0.882997	PLEKHA1	0.911529
ITGA5	0.441563	CD83	0.627151	GPR183	1.28006	IL32	1.54859	LOC643870	1.21793	NBEAL2	1.38932					CUGBP2	0.835854	ANXA1	1.15717	DPEP2	0.88225	AGTPBP1	0.909907
XAF1	0.434362	ZNF184	0.623261	ZBED5	1.27937	MT1E	1.54832	LOC728572	1.20522	FAM108A2	1.38407					NBPF3	0.83472	TNF	1.15679	GALT	0.878978	MGC16384	0.89859
LARP4	0.429971	PNPLA8	0.618739	TRAF3IP2	1.277	TGFBI	1.5364	ARMCX2	1.20303	CTSC	1.37693					FYTTD1	0.832942	NBEAL2	1.15134	KIAA0355	0.876074	PIK3AP1	0.897516
IFFO2	0.422504	LOC100130092	0.617772	CYLD	1.27677	DPY19L1	1.53304	LOC729510	1.20301	LOC731007	1.37036					GPR160	0.832084	HLA-DMA	1.15125	LDLRAP1	0.872719	CPD	0.890294
SLC22A23	0.404597	MT1A	0.617083	SEPT6	1.26363	LOC731007	1.53303	LOC650739	1.20084	LOC653438	1.36911					CYLD	0.830826	LOC728069	1.14716	NFE2L3	0.8658	LOC653496	0.888928
FLJ39639	0.399022	DHX40	0.614112	BEX4	1.26112	DPYSL2	1.52198	LOC442270	1.19201	CTNNA1	1.36173					KAT2A	0.830614	HLA-DQA1	1.14225	TRAPPC2P1	0.865784	LGR6	0.880798
		ZNF22	0.613348	ZNF439	1.25432	CTSH	1.52094	IGLL1	1.19159	MSN	1.35867					NPAT	0.826296	CLECL1	1.13274	LTA	0.862427	FAM108A3	0.870834
		SLC3A2	0.610611	LOC791120	1.25107	CASZ1	1.52093	TCEAL2	1.19073	MAP3K8	1.35706					LOC728014	0.825576	DYNLL1	1.12799	FXYD5	0.861754	TESC	0.854341
		NFU1	0.610233	SLC16A10	1.24682	ANXA5	1.51914	LOC390578	1.18768	GLIPR2	1.35311					DHRS3	0.820402	TESC	1.12531	LOC339192	0.860064	UBE2E3	0.852221
		ZNF317	0.609282	LOC286208	1.23284	LAG3	1.51214	LOC648099	1.18189	ABI3	1.35085					KIAA1267	0.815792	TGFBI	1.12498	ST8SIA1	0.853094	PTPN4	0.851807
		SMARCD3	0.606884	SREBF1	1.23034	AHNAK	1.50912	NR3C2	1.18169	KIAA1949	1.34855					LAPTM4B	0.815299	HLA-DRB3	1.1241	LEPROTL1	0.850884	ATPGD1	0.840229
		FAM103A1	0.599411	DACT1	1.22909	CHN2	1.50813	BZW2	1.18056	PAFAH2	1.34469					TIGA1	0.814681	GLB1	1.12379	ZBTB25	0.847835	KIF21A	0.828829
		MOBKL3	0.598879	FAM153B	1.22828	LOC646044	1.50715	LTBP3	1.17945	NCALD	1.34055					SNRNP70	0.813915	DNCL1	1.1226	NCF4	0.84646	DPY19L1	0.826918
		CEBPZ	0.598052	LOC100134144	1.22782	MRPL10	1.50697	FHIT	1.17886	ITPRIPL2	1.33579					ABLIM1	0.813175	CYB561	1.1143	LOC730256	0.833765	CLCF1	0.818957
		SKP1	0.594957	STS-1	1.22681	TOX	1.50483	GAL3ST4	1.17786	PPP1R16B	1.3292					DHX32	0.808803	TBXAS1	1.11424	AP3M2	0.831374	YPEL1	0.817592
		DPM1	0.594557	MMP28	1.22598	TYROBP	1.50334	HPCAL1	1.17683	LOC644988	1.3285					RPL9	0.807544	NCF4	1.11385	HPCAL1	0.831311	FBXO6	0.799719
		MAGOH	0.59295	RPL9	1.2198	CD226	1.49604	LOC643310	1.16891	SIGLECP3	1.32747					LOC646949	0.807491	CCR4	1.11317	AGMAT	0.826752	PTPRE	0.790188
		SPINT2	0.592864	LINS1	1.21561	CD8A	1.49232	FAIM3	1.1689	SAMD3	1.32554					FBP1	0.807241	HRASLS3	1.11254	CXCR6	0.822121	ENPP5	0.790052
		FKBP11	0.586985	LOC645231	1.20982	ITPRIPL2	1.48764	DHRS3	1.16543	TXNDC3	1.32096					PDK1	0.804991	PRC1	1.11123	CCR9	0.820553	LITAF	0.790028
		FBXO8	0.585248	LOC341315	1.2097	FAM53B	1.48712	PTP4A1	1.16294	SRXN1	1.3207					SPINT2	0.80394	F2R	1.09589	RGS10	0.820461	MMP23A	0.788644
		OSBPL5	0.583272	MTMR10	1.20656	YWHAH	1.48027	SCARNA9	1.16209	RHBDF2	1.32018					TARBP1	0.803423	LOC646044	1.09247	CASP6	0.812559	IFITM2	0.788244
		GUK1	0.582555	HKDC1	1.19478	RHBDF2	1.4782	SLC22A17	1.16156	MXD4	1.3191					SNORD4A	0.800383	YWHAQ	1.09015	SYPL1	0.810357	GFOD1	0.788151
		MCM6	0.580065	SNHG1	1.19418	ADAM8	1.47178	CLEC11A	1.15564	ITGB7	1.31669					CCDC106	0.79992	DUSP1	1.08868	PNPLA7	0.796555	TSEN54	0.787564
		PGK1	0.579626	GRAMD1A	1.19351	GLIPR2	1.46841	SPRY1	1.15547	TPST2	1.31545					LRMP	0.798968	CD82	1.08802	FLJ38969	0.796003	PEPD	0.786645
		TSSC4	0.578442	TPM2	1.19209	NCRNA00152	1.46732	LOC146053	1.15541	EIF4G3	1.30517					ZNF275	0.796323	OPTN	1.08402	OCIAD2	0.795544	RRBP1	0.785485
		MED10	0.577685	PAICS	1.19131	SPON2	1.46542	SPINK2	1.15315	FLNA	1.30453					LOC645231	0.795965	MYBL1	1.07753	NFKB1	0.794642	DSTN	0.784047
		TSGA14	0.576513	LOC100134018	1.18185	TNF	1.46127	FAM10A4	1.15194	ALOX5AP	1.29752					LOC652637	0.795939	HLA-DMB	1.07667	TRADD	0.794192	CDC14B	0.781932
		BNIP1	0.57412	KIAA0922	1.17731	SLC2A8	1.46087	RPL13L	1.14958	FASLG	1.29663					UBE2E2	0.795683	CDKN1A	1.07372	ANO9	0.790758	JAKMIP2	0.778691
		PIAS2	0.572706	LOC338799	1.17696	CD63	1.46055	RPLP1	1.14144	FAM38A	1.29473					LOC791120	0.794055	HSPA1A	1.0729	MGST2	0.78954	CD226	0.76997
		PSMA1	0.566176	BEND5	1.1768	NUAK1	1.4596	NRIP1	1.13885	IFNG	1.29342					LOC100233209	0.793975	CKLF	1.06916	NINJ1	0.788119	PYHIN1	0.769299
		TFAM	0.555356	NAT9	1.17618	ANXA1	1.45879	LOC729760	1.13858	LOC100130000	1.28994					LOC727970	0.793714	ADRB2	1.06911	F5	0.785579	NMUR1	0.768759
		NARG1L	0.552089	HAPLN3	1.15228	PARP8	1.45686	LOC441032	1.13504	IL2RB	1.28957					LOC400455	0.792787	NPC1	1.06424	ACP5	0.785108	CTSC	0.768643
		SNRPB	0.551052	HIPK2	1.14918	PLOD1	1.45504	LOC643779	1.13143	ERN1	1.2875					TOP1MT	0.792693	GPR68	1.05791	HIVEP2	0.783853	PPP2R5C	0.761901
		SYT15	0.547734	NR3C2	1.14322	SMAD5	1.44898	BCL2	1.12961	DPY19L1	1.28598					TMEM41B	0.788434	MAP3K5	1.05729	KCNIP3	0.781149	SRXN1	0.758402
		ADK	0.541607	APBA2	1.14127	PTPN4	1.44495	OCIAD2	1.12702	SPON2	1.27638					RGS10	0.783575	LOC391075	1.05615	KIAA0748	0.777243	SNTB1	0.755466
		CSRP2BP	0.540234	STX16	1.14091	IGFBP3	1.44273	UBE2E2	1.1246	LOC653496	1.27434					LOC100132345	0.783495	TIGIT	1.0541	HKDC1	0.772605	TOX	0.74919
		CCDC69	0.532607	EPHB6	1.14036	NBEAL2	1.44053	AKTIP	1.11979	GPR65	1.27268					NARG1L	0.777035	IL18R1	1.05377	FTH1	0.771716	PLCB1	0.740171
		PREI3	0.530321	ARMCX2	1.13888	MTSS1	1.43415	LOC25845	1.11863	RUNX3	1.27178					WHAMML1	0.774601	CD151	1.05189	CDT1	0.770886	SOCS2	0.739596
		TOMM22	0.529256	FBLN7	1.13348	CD151	1.43142	LOC730525	1.11711	ARPC5L	1.26985					AMY2A	0.773972	AHNAK	1.051	MAD2L1	0.762773	CMIP	0.739041
		LOC100133328	0.527186	GPC2	1.13156	S100A11	1.42792	LOC646784	1.1171	REEP5	1.26626					VNN2	0.773101	LIMS1	1.04936	TNFAIP8L1	0.762516	WDSUB1	0.738697
		RNMT	0.523771	GIMAP1	1.13046	GZMM	1.42436	NUCB2	1.11474	ENPP4	1.26424					DGKA	0.770519	ELOVL5	1.04869	ETFB	0.757712	NPTN	0.736541
		SH3BGRL3	0.523638	LOC645515	1.12662	FBXO6	1.424	LOC136143	1.1106	SLC27A3	1.26212					LOC642738	0.76997	CCDC50	1.04837	CDC2	0.755901	ATP5I	0.729883
		MAGED1	0.515022	LOC400455	1.1197	SRGN	1.40862	SH3BGRL2	1.1103	OSBPL5	1.26032					ZNF573	0.769913	ADAM15	1.03543	TRAF5	0.755701	KAT2B	0.72807
		DYSF	0.505487	LTA	1.11755	PTGDR	1.40369	RGL4	1.10748	EMP3	1.24732					BRDG1	0.769279	CASZ1	1.03175	DUSP4	0.751764	ABCB1	0.726039
		FABP5	0.50257	NSUN5	1.11717	TXNDC3	1.40013	LOC731542	1.10678	PDGFD	1.23888					SNPH	0.766765	EZR	1.02996	RNASET2	0.749402	BTBD15	0.724828
		MRPL55	0.495219	RCAN3	1.11475	DHRS7	1.39242	FLJ38969	1.10507	CD63	1.23491					LOC100129934	0.766436	SH3GLB1	1.02894	PAICS	0.745963	ARL5A	0.720735
		LOC654244	0.491494	ABCA1	1.11131	HCG4	1.38833	SIRPG	1.10397	LCP1	1.23453					SFMBT2	0.76639	VIL2	1.02707	KLHL22	0.744759	SYT11	0.720577
		SIL1	0.490316	LY96	1.10967	PTPN12	1.38725	CDR2	1.10056	TXN	1.22894					STAP1	0.764365	PPP4R1	1.02434	LOC440895	0.741644	PRKCB	0.71939
		PUF60	0.489738	LOC91561	1.10955	ADAM19	1.38494	MEGF6	1.0994	UAP1	1.2253					LOC100128771	0.763498	CDC45L	1.0222	MAPK3	0.738844	ITGB1	0.71855
		LOC441089	0.488681	SLC16A5	1.10719	CRIP1	1.38173	ATP6V0E2	1.09802	ZC3H12A	1.22343					TECPR1	0.763212	RUNX3	1.02012	CHN1	0.738555	TSPAN2	0.71512
		ERCC1	0.487691	LOC729500	1.10581	SYTL2	1.38073	DPH5	1.09797	RAPGEF1	1.22244					PIK3IP1	0.762225	LOC653506	1.0195	IL23A	0.737811	SLCO4C1	0.713491
		TFB2M	0.482167	LOC643310	1.1029	SELS	1.37411	LOC641750	1.0962	SLC2A1	1.217					FOXO1	0.761984	MRPL10	1.01834	PARP3	0.736538	RNF144A	0.712148
		GSK3B	0.473047	BTG2	1.10187	SMAD7	1.36894	MMP28	1.0962	PTPN12	1.21636					LOC729004	0.761824	GNA15	1.01418	FOXO1	0.730488	ELOVL6	0.710173
		TCEB3	0.469823	RERE	1.10075	REEP5	1.36718	LOC100129645	1.09512	LOC729495	1.21478					MTX3	0.758428	ACOT9	1.01031	DIP2B	0.724696	ZDHHC14	0.708707
		DKFZp686O24166	0.46396	PLCXD1	1.10013	TSHZ3	1.36207	LOC643007	1.09145	LOC100133080	1.21296					CROP	0.757214	IQGAP2	1.00922	SLC35D2	0.721838	PAPD5	0.708076
		ACCN2	0.442053	USP10	1.09901	CCL4L1	1.35899	ZNF256	1.09092	PPP2R5C	1.20732					PCF11	0.75695	ST8SIA1	1.00876	TNFSF8	0.720927	ZBTB44	0.707777
		PIGT	0.433148	IRS2	1.09564	FAM125B	1.35437	LOC390735	1.08965	KIR3DL2	1.20503					NCRNA00219	0.755506	LMO4	1.00679	ALCAM	0.711848	FCRLB	0.706591
		SLC25A46	0.428758	LOC100130750	1.09447	RAB9A	1.35338	LOC646093	1.08952	LGR6	1.20283					ZNF467	0.754317	GLIPR2	1.00554	TMEM63A	0.710181	LOC54103	0.703363
		LOC642956	0.410683	OVGP1	1.09402	CD74	1.35267	ITPKB	1.08789	ITGA5	1.2016					CD248	0.74937	PAQR4	1.00484	CARD17	0.709161	YES1	0.700084
		ZNF498	0.386123	ITPKB	1.09206	BATF	1.35107	LOC648103	1.08704	SH2B3	1.20155					TNRC6A	0.749319	SMAD3	1.00319	IKBKE	0.706607	RAB9A	0.699864
				INPP4B	1.09107	GAS7	1.3479	LOC100131866	1.08654	OSBPL7	1.19907					PI4KAP2	0.747758	LOC643733	1.00186	GNA15	0.704668	GALC	0.698875
				MEIS3P1	1.08898	TTC16	1.34712	FAM113B	1.08645	CTSW	1.19851					LOC100128510	0.744132	SEC61B	1.00021	WNT10A	0.69812	TWSG1	0.694702
				LOC647436	1.08458	FAM108C1	1.34306	PNPLA7	1.08422	B3GAT1	1.19755					LOC729500	0.74341	S100A6	0.997156	NECAP2	0.697209	PRR5	0.694194
				CBX5	1.08382	GYG1	1.33844	SYPL1	1.08096	SH3BGRL3	1.1956					LOC439992	0.740634	SLC7A5	0.993315	ADK	0.695008	ITGAL	0.692491
				TIGA1	1.07898	KIF21A	1.33581	LOC100131323	1.08027	MATK	1.19528					LOC100132707	0.73756	ATP6V1D	0.992345	MYB	0.68962	GALNT10	0.689522
				TNFSF8	1.07738	SRXN1	1.33486	LOC643308	1.07734	RCBTB2	1.19408					LOC342994	0.736984	SAMSN1	0.989369	ITGA6	0.683217	CALM1	0.687393
				LOC100130298	1.07524	HCST	1.33118	HSPB1	1.07498	ABHD7	1.19094					ZCWPW1	0.735052	PRDM8	0.987043	TAGAP	0.68272	MST4	0.683168
				NSUN5C	1.07306	PMAIP1	1.33114	LOC389404	1.07358	SERTAD3	1.18984					RPL22	0.731744	CASP1	0.986558	HNRPLL	0.681541	HES6	0.683086
				EMR4P	1.07238	IL10RA	1.32281	RPL22	1.07329	RORA	1.18838					BCL2	0.730778	RNF19A	0.982334	SORBS3	0.679559	ADIPOR2	0.679581
				LOC400652	1.07164	LOC643035	1.31846	LOC100134504	1.07139	FAM108A3	1.18719					GPR1	0.728816	OASL	0.981087	CCDC104	0.675178	CCDC65	0.678405
				KANK1	1.06699	FAM108A2	1.31499	TACC3	1.07013	SMAD3	1.18409					PIK3CD	0.728436	DUSP23	0.978668	DGCR6L	0.669901	YWHAQ	0.677195
				LOC100129982	1.06468	DSTN	1.31079	CDKN1B	1.06822	LYAR	1.18395					IMPDH2	0.727722	BLVRA	0.976655	CCR10	0.668948	ITGA5	0.675688
				CCDC106	1.06423	MAPK1	1.30899	MYB	1.06805	TTC16	1.17694					LOC646841	0.727403	HIST1H1C	0.976401	MBOAT1	0.668719	MTPN	0.673992
				NCRNA00219	1.06223	B3GAT1	1.30104	LOC91561	1.06785	YWHAQ	1.17432					ZBTB40	0.727162	TSPAN5	0.975515	STAT5A	0.667011	HLA-DPA1	0.672733
				FLJ38969	1.06112	STX11	1.29976	AGMAT	1.06763	HNRPLL	1.17393					ZNF629	0.725518	GAPDH	0.972866	TTC39C	0.664663	HCST	0.669186
				DKFZp761P0423	1.05949	S100A10	1.29747	LYRM5	1.06755	PLOD1	1.1738					GUSBL1	0.724027	LOC653888	0.964436	GBP2	0.663864	PTPN22	0.668756
				CAMK4	1.05723	PDGFD	1.29617	SREBF1	1.06636	PTPN7	1.17244					KLHL24	0.723469	SPPL2A	0.963525	IMPDH2	0.658633	BMI1	0.663664
				CRIP2	1.05631	HLA-DRB3	1.29511	SOX4	1.0647	DSTN	1.16506					CRTC3	0.720077	PRDX1	0.960994	CASK	0.65693	TNFRSF1A	0.662589
				DIP2B	1.05627	LOC644988	1.29413	LOC641848	1.06343	MT1E	1.15477					TTC14	0.718326	SEPX1	0.960959	EDG4	0.656373	ARSD	0.658585
				SGSM2	1.05601	TXN	1.28888	LOC646849	1.05914	ATXN1	1.15296					SVIL	0.718203	S1PR5	0.95905	GTSCR1	0.651869	SLC25A4	0.656139
				APBB3	1.05496	JAKMIP2	1.28495	LOC100131672	1.05902	HES6	1.15177					CRLF3	0.716015	CTSC	0.956142	CTSA	0.648383	TUSC4	0.655345
				GPA33	1.05378	LCP1	1.28339	LOC100131662	1.05605	LOC645442	1.14805					DPH5	0.715649	OBFC2A	0.955281	ECGF1	0.647247	DNAJB6	0.65076
				PIP3-E	1.053	GPR68	1.27681	LOC137107	1.05438	LOC643035	1.14667					TRAP1	0.714659	CXCR6	0.954149	HINT1	0.644416	PTCH1	0.650016
				LOC339192	1.05212	LMO4	1.26982	RPL31P10	1.05218	HLA-DRA	1.14427					LOC648659	0.714476	MYL6	0.945436	FOXP1	0.644179	DAB2	0.643463
				TMIGD2	1.04996	LOC653438	1.2684	PAICS	1.05208	IRF4	1.14065					STX16	0.7138	LOC646786	0.944321	DGCR6	0.644051	CALR	0.640529
				NUAK2	1.04743	CCDC50	1.26676	RNF138	1.05169	SLC20A1	1.13795					PBX3	0.713647	PSMB2	0.943245	SOD2	0.640287	GALNT1	0.637975
				PDE9A	1.04536	HOXC4	1.26188	LOC646785	1.04785	KAT2B	1.13478					BEX4	0.713011	E2F3	0.942468	CEACAM1	0.640197	ACPL2	0.631612
				UBASH3A	1.04113	KLF11	1.25967	SOCS1	1.0462	ORAI1	1.13399					ST13	0.712688	CLIC3	0.939672	PABPC1	0.638599	LOC644677	0.628097
				LOC136143	1.03711	HNRPLL	1.25952	FLJ35801	1.04152	LOC100131940	1.13202					LOC654350	0.709744	SEPT11	0.932824	GSTK1	0.638587	ATP2B4	0.626996
				AP3M2	1.03555	CCL4	1.25745	FAM173A	1.03906	RAB27A	1.13152					TAF4B	0.706245	GARNL4	0.932807	MGC15763	0.638087	LRMP	0.623919
				ZBTB25	1.0353	PPP2R5C	1.25382	LOC100129952	1.03705	TUBB2C	1.13119					IL6ST	0.704336	ITGAL	0.93031	TRIB2	0.634192	ACSL4	0.623169
				PECAM1	1.03178	SLAMF7	1.2524	TNFSF8	1.03582	RHOQ	1.12751					FOXK1	0.703846	REEP5	0.929312	PHGDH	0.627689	NPC1	0.619252
				HPCAL4	1.02807	GNG2	1.24975	SHISA2	1.03455	CTSH	1.12642					RBM33	0.702995	PRIC285	0.924239	ATP8B2	0.619461	SAR1A	0.618533
				LOC648099	1.02777	SPPL2A	1.245	PLEKHB1	1.03367	SOX13	1.12541					RASGRP2	0.702661	SNTB2	0.924144	NBL1	0.616695	HEG1	0.617657
				LOC727970	1.0253	S100A6	1.24306	GIMAP1	1.03257	MAP3K5	1.12435					LOC649839	0.701035	LOC440043	0.921811	PRKCZ	0.616028	PAIP2	0.605801
				LOC200030	1.02409	LOC645442	1.24277	ADSL	1.03255	GLIPR1	1.12391					WDR19	0.700108	WSB2	0.921707	KIAA0391	0.61168	LATS2	0.605772
				AMY2A	1.02359	FEZ1	1.24207	LOC646527	1.02941	MTSS1	1.11866					BCL11B	0.699383	MYO5A	0.91929	FABP5	0.600857	PSCD4	0.604153
				RPL22	1.0202	FLNA	1.24062	CHKA	1.02876	TNF	1.11441					FAM10A4	0.699363	MXD4	0.918583	MAP4K2	0.60063	B4GALT4	0.598511
				FBLN5	1.01817	CLCF1	1.23899	NDFIP1	1.02729	FAM108C1	1.11003					RECK	0.698906	TAP1	0.918077	RHBDD2	0.600181	CD244	0.59651
				LMTK3	1.01628	PPP1R16B	1.23833	TCF7	1.02649	PTMS	1.10784					ROBO3	0.69819	SLC2A8	0.914593	CAMK4	0.597626	ATL1	0.596005
				SYPL1	1.01451	LOC729495	1.23528	LOC645018	1.02646	SLC2A8	1.10591					NFKBIZ	0.698041	ATP1B3	0.914511	CLYBL	0.597326	LOC644162	0.594489
				SPTBN1	1.01155	CDK2AP1	1.23147	SNHG1	1.02578	TAPBP	1.10588					MBTPS1	0.695691	COX5A	0.914396	RASSF2	0.597145	LIPA	0.591241
				LOC613037	1.0094	BCL2L1	1.22894	DKFZp761P0423	1.02364	PTPRC	1.10375					LOC731777	0.695655	OSM	0.914072	SGSM2	0.594373	ITGB2	0.587031
				PAN2	1.00854	DOK2	1.21012	ZBTB25	1.02231	LOC100133583	1.10017					TMEM45B	0.695492	VCL	0.914024	CLPP	0.591467	PDIA3P	0.582225
				PLCG1	1.00853	E2F2	1.20961	ACSS2	1.02025	IDS	1.09875					SNORD38A	0.694548	RAB11FIP1	0.912322	TOM1	0.59102	PDLIM5	0.578416
				LOC651309	1.00655	TMEM181	1.2058	DIP2B	1.01829	IQGAP1	1.09467					GRAP	0.693443	SEC11C	0.908007	IFI27L1	0.590494	XPNPEP2	0.57787
				FVT1	1.00571	RAB7L1	1.2027	KLF2	1.01745	MSC	1.0919					LBH	0.691138	ADCY3	0.907319	RPA3	0.590396	RAB7L1	0.572634
				BZW2	1.00239	IQGAP2	1.20157	LOC646672	1.01723	LOC646044	1.08988					LOC100130750	0.68999	RPL39L	0.905782	RASGRP3	0.58983	LOC643752	0.570255
				LOC654103	1.00086	PTPRC	1.19468	SIK1	1.01556	SLC1A7	1.08988					RBM26	0.689405	GYG1	0.90571	TTC32	0.589371	DUSP14	0.570113
				LOC646784	1.00075	RAPGEF1	1.19406	LOC728774	1.01513	CYBA	1.08978					PURA	0.688503	RAB37	0.903979	STAMBPL1	0.588192	MOCS1	0.570021
				GIMAP8	0.997201	PICALM	1.1883	CHD7	1.01338	CD2	1.08875					CNN3	0.684474	KIAA1949	0.900653	EIF3G	0.587083	SLC1A7	0.567777
				TRAP1	0.996701	NUP98	1.18792	NBL1	1.01307	MAPK1	1.08454					NPIP	0.682937	TCTEX1D2	0.895995	PIM3	0.586896	CTSD	0.563291
				LOC646849	0.991995	RAB27A	1.18714	GPX1	1.01299	IFIT2	1.08341					MLLT6	0.681908	RABGAP1L	0.894714	LPAR2	0.583183	SELS	0.562145
				LOC100131541	0.99067	CD81	1.18683	LSM5	1.01179	SLAMF6	1.08227					TNPO1	0.67962	LOC729768	0.893648	PHF19	0.578757	TMEM19	0.55251
				LOC100132345	0.990325	CHSY1	1.18361	GRASP	1.0115	RALGDS	1.08153					ZNF550	0.679441	FBXO5	0.8923	PVT1	0.578574	GOLPH4	0.548244
				CDK5R1	0.990078	FAM38A	1.18282	DPEP2	1.00842	CD226	1.08132					LOC727962	0.678563	LOC651816	0.890497	EHD4	0.577287	AGTRAP	0.547057
				RPLP0	0.985286	GK5	1.17983	LOC441013	1.00841	TNFSF14	1.07658					ALDH5A1	0.678189	SMC4	0.886758	RASA1	0.572863	VPS26A	0.544236
				BCL11B	0.981756	SLC20A1	1.1775	TNFAIP8	1.00588	BTG3	1.07298					KIAA1147	0.678049	CD81	0.883894	SEPN1	0.568677	WDR67	0.542396
				LOC388556	0.981119	KAT2B	1.17662	HOOK1	1.00466	GALM	1.071					SPOP	0.676081	CDT1	0.883765	WWP1	0.566727	IQCG	0.538935
				PLEKHG4	0.980832	CXCR3	1.17573	CICK0721Q.1	1.00445	ADIPOR2	1.07061					ARHGEF1	0.675	FABP5L2	0.88215	RAB43	0.565045	AHNAK	0.537669
				KLHL6	0.980824	IQGAP1	1.17514	LOC729236	1.00435	ELF4	1.06954					KIAA0922	0.674464	ATP6V0B	0.87678	RERE	0.56481	FUT11	0.536217
				LOC100233209	0.977191	PERP	1.17474	LOC653702	1.00427	KIR2DS5	1.06926					PPP1R3E	0.673453	NUDT5	0.876091	PRDX1	0.558956	DENND3	0.535931
				LOC100132795	0.976922	IL12RB1	1.17377	PABPC1	1.00417	AKNA	1.06641					TMEM137	0.670174	NOD2	0.875689	INF2	0.556571	ZNF364	0.532031
				UNC84A	0.976901	LGR6	1.17365	LOC391019	0.999473	HCG4	1.06619					STAT4	0.668161	ZNF831	0.87568	LOC100134018	0.554809	PHLDB2	0.530415
				HIVEP2	0.974793	HERPUD1	1.17001	LOC645691	0.999002	HLA-F	1.06541					H1F0	0.667773	LOC642073	0.875043	TCF7	0.553327	FOXO3	0.525097
				LOC285359	0.97447	RAP1BL	1.16805	PPA1	0.998851	NCRNA00152	1.06388					LOC645515	0.667676	CENTA1	0.872442	KIF11	0.548361	LAMP1	0.52075
				FOXP1	0.973369	MSN	1.16183	LOC100129067	0.99818	JAKMIP2	1.06246					JAM3	0.665618	IFI27L2	0.868875	RFNG	0.538804	ARHGEF3	0.519966
				RAB43	0.970436	OASL	1.15844	LOC400455	0.994438	KIR3DL3	1.05921					LOC100129982	0.664561	NDRG1	0.867201	LAMP3	0.537846	SSBP4	0.513738
				TMEM123	0.969553	RRAS2	1.15481	RPL23A	0.993686	NUP98	1.05834					LOC728843	0.663767	CD84	0.866599	U2AF1L4	0.534269	BFSP1	0.513548
				VSIG1	0.969515	MXD4	1.15092	LOC100129243	0.992089	RHOU	1.0564					AGAP8	0.662629	PVRIG	0.866053	TTF2	0.533048	LOC646674	0.512649
				RGL4	0.96793	SBK1	1.1483	LOC388076	0.991893	CD74	1.0562					EFNA1	0.662481	CHP	0.865143	IL27RA	0.532261	RAB27A	0.511754
				ARHGEF18	0.966166	FLJ33590	1.14657	TAF4B	0.989096	ID2	1.05336					TCEAL2	0.662252	DUSP4	0.863191	KLHL6	0.530057	LOC648868	0.508296
				SCARNA16	0.965939	ATP6V1D	1.14567	NCRNA00219	0.988605	DUSP10	1.05198					PIP3-E	0.661086	GBP1	0.863072	GALM	0.529166	LOC641972	0.507589
				AGMAT	0.963992	ARPC5L	1.14455	ZBED5	0.98763	PTPRM	1.05183					LOC642934	0.659823	ASPM	0.862571	EZH2	0.527208	DNAJB14	0.503978
				CSAD	0.963951	RORA	1.14299	LOC387753	0.98714	ITGB2	1.05014					ZRANB2	0.658666	CD70	0.862461	GAL3ST4	0.526952	WIPI1	0.497094
				GTPBP3	0.960339	ATXN1	1.13816	FRAG1	0.986943	SLAMF7	1.04701					APEX1	0.658653	HN1	0.862334	SOX8	0.525374	NOTCH2	0.495257
				STAMBPL1	0.95858	METRNL	1.13751	GIMAP8	0.986752	RCAN2	1.04509					TMEM106B	0.658437	SLC16A3	0.862089	TRMT1	0.523978	ROD1	0.494418
				LOC646949	0.955564	SKAP2	1.13461	LOC730288	0.985768	CD81	1.04189					SETD6	0.656979	SLC35F2	0.855815	NETO2	0.522616	FCHO2	0.491585
				SFI1	0.955374	SYNM	1.13206	LOC100129685	0.983241	LOC642083	1.04051					RNF216	0.656908	CD300A	0.855696	LIMS2	0.506251	RDH10	0.485928
				NPM3	0.954184	KIAA1949	1.1314	LOC402057	0.981721	BZRAP1	1.03953					FAM101B	0.655298	PSTPIP1	0.855674	IGBP1	0.500516	RASAL3	0.481033
				DPH5	0.952154	GALNT10	1.1306	OVGP1	0.981634	IGF2R	1.03946					ZNF274	0.654197	FLNA	0.855111	PPP1R3F	0.472717	LOC401002	0.471116
				KAT2A	0.951563	RAB37	1.12769	LOC100130750	0.981263	RNF19B	1.03578					SDK2	0.65398	FAM53B	0.852311	LOC645515	0.458948	RCAN1	0.466289
				IL17RA	0.950409	EBP	1.12662	ALDOC	0.980914	LOC644162	1.03301					CCDC45	0.652206	FGR	0.848815	FAM58A	0.456939	ZNF654	0.46197
				TOP1MT	0.950204	LOC653496	1.12118	RNF157	0.979818	SYNE2	1.02884					LTA4H	0.651547	RAP2A	0.846731	EEPD1	0.451999	ZNF22	0.458902
				AEBP1	0.949177	CYBA	1.11906	LOC650369	0.97943	TMX4	1.02355					REV1	0.651134	MAPK1	0.845696	NLRP3	0.446721	ARRB1	0.457444
				LOC441506	0.948246	SLC2A1	1.11522	CRLF3	0.97858	LTBP4	1.02347					FLJ31306	0.650984	NCAPG	0.839876	ZNF154	0.443717	MAPK1	0.449499
				LOC439992	0.947657	ITGB2	1.11236	EPHA1	0.977951	ZBP1	1.02345					NACAP1	0.650088	LCP1	0.838433	UBASH3B	0.44227	SEC63	0.443589
				CTSL1	0.94649	SAMSN1	1.11018	EFHB	0.977908	RNF166	1.02343					ATP1A1	0.648239	CASP4	0.836978	SERINC5	0.437915	SNX5	0.441124
				STAT5A	0.946369	APOBEC3F	1.10725	LOC729686	0.975751	ARPC2	1.02309					GGTL3	0.646846	CCNA2	0.835491	IFNAR2	0.426519	AGA	0.436671
				ARRDC5	0.946326	FRMPD3	1.10693	ARRDC2	0.975473	DENND3	1.023					LOC440487	0.646302	IDH2	0.835296	HDAC7A	0.41341	FAM49B	0.427858
				TARBP1	0.944541	PRKCD	1.10626	LOC401817	0.970477	SPPL2A	1.02289					SCNN1D	0.646025	ACOT7	0.835228	LCMT1	0.412896	SLC4A4	0.413173
				LOC729236	0.943576	PEPD	1.10597	DPP4	0.970395	KLF6	1.01712					GTPBP3	0.64545	IDS	0.834823	REM2	0.408466	STARD3NL	0.411589
				NBPF3	0.941666	CEBPB	1.10542	LOC730029	0.970378	MGAT1	1.01521					EFHD1	0.644512	SAMD3	0.834712	FLJ40504	0.348808	SCAMP4	0.398201
				LOC654350	0.941562	FAM108A3	1.10147	LTA	0.970177	IDH2	1.01498					CEP63	0.64437	APOBEC3D	0.834651			ARL15	0.381064
				FAM10A4	0.940378	CAPNS1	1.10003	LOC100131160	0.969448	RDH10	1.01473					WDR74	0.644125	LOC731314	0.828742			FAM102B	0.356132
				HMGA1	0.938204	RALGDS	1.09798	BCL11B	0.968926	CDK2AP1	1.01373					ZNF559	0.64371	CD52	0.82845
				LOC100133866	0.938106	EIF4G3	1.097	TOP1MT	0.968848	KIF19	1.01263					LOC645430	0.642704	TNIP1	0.826148
				LIG1	0.934366	ATP1B3	1.09287	LOC388564	0.968259	CASP1	1.01161					LOC647673	0.642373	AMY1B	0.823148
				TMEM63A	0.934124	IGF2R	1.09049	LOC728843	0.966148	BCL2L1	1.00831					FLJ13197	0.642143	FAR2	0.823086
				BBS2	0.933779	LOC646786	1.08796	LOC729500	0.96584	GZMM	1.00686					LOC728572	0.641716	UBE2L6	0.819385
				STAP1	0.933093	HPS6	1.08699	SLC5A6	0.965713	SBK1	1.00478					LEPROTL1	0.640912	RAPGEF1	0.818529
				LOC728572	0.932832	PRNP	1.08315	SLC40A1	0.96567	PTTG1	1.00195					LOC100132199	0.640206	SSBP4	0.816721
				TAF4B	0.932795	DUSP23	1.07976	LOC439992	0.965338	PTTG3P	0.999059					GIMAP8	0.639437	SAT1	0.813597
				LOC729004	0.932311	MTPN	1.07619	LOC645737	0.964037	PPP1CA	0.998823					ZNF148	0.639235	PGAM1	0.812693
				PABPC3	0.932169	TUBB2C	1.07562	TSGA14	0.963794	YWHAH	0.998388					FAM89A	0.638225	LOC644237	0.812543
				LOC648659	0.929874	CDK2AP2	1.07039	HSPH1	0.96289	PQLC3	0.998122					LOC100134540	0.638085	SELS	0.811968
				LOC100128510	0.929478	ARAP2	1.06706	PLAG1	0.959627	PTP4A2	0.99603					EFHB	0.637323	LIME1	0.81159
				ZNF302	0.928797	SASH3	1.06422	CAMK4	0.957533	FRMPD3	0.99521					LOC100128083	0.637029	TMEM120A	0.810849
				ZNF256	0.928718	LOC440043	1.06309	UBA52	0.955858	ABR	0.995063					SMA4	0.635861	STAM	0.810102
				SERINC5	0.928425	LOC642073	1.06244	TRMT1	0.9543	LASP1	0.994659					MST4	0.635371	GBP2	0.809863
				LOC644931	0.92839	RCAN2	1.06047	FVT1	0.954247	RXRA	0.994396					LOC644949	0.634283	PSMA5	0.807765
				TMEM45B	0.928255	IDS	1.05798	LOC651453	0.953674	SURF4	0.99353					ZMYND8	0.63279	PERP	0.805603
				SH3PXD2A	0.927311	LDOC1L	1.05439	LOC729677	0.952782	MAPKAPK2	0.993414					LOC653079	0.632507	GBP4	0.805284
				LOC645688	0.92607	SLAMF6	1.05425	TRAF3IP2	0.952482	RAB7L1	0.992623					LOC146053	0.632008	HIST2H2AC	0.804694
				PAQR8	0.924875	PTTG3P	1.05329	PTK2	0.949968	RAB37	0.991974					NUP160	0.631825	ALCAM	0.803331
				CRLF3	0.924535	ABCA2	1.05123	LOC729362	0.949376	SEC24C	0.990155					RSL1D1	0.631577	RBBP8	0.80215
				IL6ST	0.920158	ARAP3	1.05038	LOC647030	0.948151	ZNF296	0.989243					LOC402677	0.631407	GPR172A	0.799785
				BNIP3	0.920083	SEPT11	1.04903	SATB1	0.946059	ATG2A	0.985869					NFIX	0.629766	SLC9A9	0.797985
				ACACB	0.917203	SH3GLB1	1.0473	DISC1	0.940791	PTPRE	0.978352					PPAPDC2	0.629442	EDARADD	0.796785
				FYTTD1	0.916817	CMKLR1	1.0434	LOC643534	0.939413	ERBB2	0.977901					SNN	0.626677	ITGB1BP1	0.794634
				LOC440348	0.91669	PTTG1	1.04167	LGMN	0.938563	PTPN22	0.974576					NAT9	0.626453	AMY1A	0.793713
				RPL13	0.916568	COMMD5	1.04068	FAM171A1	0.937193	PRKCD	0.972735					SLC11A2	0.625928	PHLDA1	0.792601
				PLA2G4B	0.916008	MFSD10	1.03845	ZNF439	0.937097	HIST2H2AA4	0.972682					EIF2A	0.623914	MRPL13	0.791353
				NSUN5B	0.914365	CD52	1.03745	NSMCE1	0.936866	ARNTL	0.971628					PHKA2	0.622179	CDK2AP2	0.790438
				RASGRP2	0.913277	CD2	1.03729	P2RY10	0.935571	LOC100132535	0.971131					BNIP3	0.622168	ARPC4	0.788887
				ATM	0.912967	LOC100133583	1.03499	LOC645231	0.933887	ARAP2	0.965082					LOC286157	0.621532	ZNF593	0.787943
				LOC389404	0.911583	KIF1B	1.03321	ATM	0.933424	CD97	0.964436					SCARNA13	0.621048	MAP3K8	0.787789
				LOC347292	0.911133	RHOB	1.03317	TCEAL3	0.932107	SYNM	0.963819					RPS23	0.620953	FAM45A	0.787655
				LOC25845	0.911121	LITAF	1.03155	LOC389672	0.931302	PAPD5	0.963581					LCOR	0.62043	NDC80	0.787148
				SORBS3	0.910824	KIF19	1.03067	LOC347292	0.930876	SH2D1A	0.963189					LOC285741	0.618885	SNX10	0.786712
				LOC730004	0.910604	SEPX1	1.02453	ALG13	0.930317	FBXO6	0.96068					MYOM1	0.617286	SRPK2	0.786599
				TNFAIP8L1	0.909823	NCR3	1.02352	LOC642817	0.930112	KIF21A	0.960661					HMGA1	0.616828	EMP3	0.786001
				PLAG1	0.9096	DNCL1	1.01539	RAB3IP	0.929177	IQGAP2	0.958471					FAM156B	0.616361	ARPC1B	0.783585
				LOC401676	0.909042	MAP2K3	1.01377	ZNF302	0.927555	LPP	0.956913					LOC731542	0.616109	PSMB9	0.77908
				PPP1R2	0.908834	IFITM2	1.01319	HIPK2	0.926323	FAM160B1	0.952629					LOC653778	0.616063	LOC541471	0.778396
				TRAF3IP3	0.90851	HSPA1A	1.01286	ALKBH7	0.926228	S100A11	0.949813					ZNF548	0.615723	FGL2	0.777943
				SNN	0.903694	CYB561	1.01264	TMEM106B	0.925921	BATF	0.948991					ENO3	0.614189	KIF1B	0.777069
				GDPD3	0.902425	OSTF1	1.01126	PSMA1	0.925566	CMIP	0.948107					LOC25845	0.613698	WEE1	0.776523
				WDR6	0.899638	PTPRE	1.01069	BNIP3	0.924639	NMUR1	0.948092					LYRM5	0.613096	HPS6	0.773375
				STMN3	0.897291	PEA15	1.01009	MEIS3P1	0.924605	PEA15	0.947901					GIMAP2	0.611638	TPM4	0.772621
				BRDG1	0.896972	CPD	1.00902	RPS10P3	0.919871	CHN2	0.946775					RYK	0.610891	CAPZA1	0.765786
				MARCKSL1	0.895839	FAS	1.00812	RPL34	0.917877	PREX1	0.946485					FAM46A	0.610349	KIF11	0.764699
				PABPC1L	0.891446	ARMET	1.00793	PHLDB3	0.917767	UBE2E3	0.945828					NDFIP1	0.610062	KLF11	0.763575
				LOC642934	0.887146	PIK3AP1	1.00787	LOC100130892	0.91762	DHRS7	0.94476					TSEN2	0.609558	ROBLD3	0.762735
				FYB	0.886962	CALHM2	1.00722	LOC100127893	0.915886	MGC52282	0.94443					LOC646723	0.609459	MGAT2	0.760244
				LOC727821	0.886138	SLAMF1	1.00674	LOC642934	0.914774	FOXO4	0.944268					LOC100132795	0.608776	HIST2H2AA3	0.758915
				LOC651453	0.886128	DYNLL1	1.00534	LOC644937	0.913003	TMEM62	0.943977					SECISBP2	0.608567	RFTN1	0.755998
				RNF216	0.885823	FNDC3B	1.00416	FLJ23754	0.912981	LOC100130561	0.941606					LOC645968	0.608343	TOX	0.755643
				ZNF274	0.884789	SNTB2	1.00212	CD7	0.912524	CAPNS1	0.940652					GNG7	0.608294	BUD31	0.754979
				LOC100128410	0.883957	MBP	0.995328	LOC646841	0.912507	SSH1	0.939708					COX19	0.608266	POMP	0.754238
				LYPD3	0.883382	WSB2	0.992817	SMARCD3	0.911609	PLEKHA2	0.939558					DYRK2	0.606676	GTF3C6	0.751454
				ANO9	0.881091	PQLC3	0.988859	EFHD1	0.910707	RPS24	0.938454					NOSIP	0.606479	TARP	0.750533
				SYNJ2	0.8792	CYB561D2	0.988508	SFXN4	0.909569	NDRG1	0.93688					C2CD2	0.603771	CRELD2	0.747522
				NCK2	0.878521	MYL6	0.98367	PER2	0.909138	FKSG30	0.935339					LOC399804	0.603748	YPEL1	0.746056
				LOC402677	0.877903	LOC642083	0.983037	LOC399804	0.909027	CASP3	0.933943					NFKB1	0.602874	ANKRD39	0.745553
				PABPC1	0.8713	ACSL4	0.981541	LOC400389	0.908014	KIAA0247	0.933283					LOC346887	0.602815	CDC2	0.745072
				PDK1	0.871	UAP1	0.981187	SNORA12	0.905206	EHD1	0.932757					ZNF700	0.60277	CDKN3	0.744952
				TMEM41B	0.868314	PLEKHA2	0.980317	FAM116B	0.904837	EBP	0.932445					RHBDL2	0.601662	YARS	0.742715
				LOC100129934	0.86744	NINJ2	0.980266	ZNF586	0.904099	OPTN	0.929957					LOC440498	0.601339	PSMB6	0.740587
				LOC400389	0.86705	KLF6	0.979038	LOC729004	0.901048	STK40	0.928634					LOC100129685	0.598955	FYCO1	0.740565
				LOC100132199	0.864202	DBI	0.979005	LOC100129982	0.900812	KIAA0913	0.924219					SNORD68	0.5989	IFI27L1	0.740293
				EEF1A1	0.862298	PTPN22	0.973935	KIAA0922	0.900425	CD8A	0.922181					PNN	0.598497	TRADD	0.740156
				LYRM5	0.859972	LPP	0.971433	LOC647104	0.898803	ACTB	0.920283					DAGLB	0.598119	TMCO1	0.737565
				LOC728791	0.859738	ZMPSTE24	0.968521	AEBP1	0.898364	GNPTAB	0.919997					SERTAD2	0.597171	PLEKHA2	0.736314
				RSL1D1	0.859355	SEC11C	0.967667	LOC652670	0.897764	TMEM181	0.919415					RICS	0.597063	CARD16	0.735396
				LOC648526	0.859308	RABGAP1L	0.966613	FAM60A	0.897698	RRBP1	0.918638					LOC646784	0.595295	MAP4K1	0.735076
				LOC730994	0.859273	CAPZA1	0.964857	LOC729217	0.896646	APOBEC3C	0.917469					HNRNPA2B1	0.594244	STAT1	0.73495
				CBX3	0.858858	ARL5A	0.964853	GNPDA1	0.896169	CD151	0.917157					TRK1	0.594082	NFE2L3	0.734685
				MZF1	0.858636	SYTL3	0.964284	MZF1	0.896068	PERP	0.916296					SEPT1	0.59293	CCR10	0.734668
				CCDC104	0.857863	GLTP	0.963533	GIMAP5	0.89559	DNASE2	0.914651					FAM13AOS	0.592702	ATG2A	0.73418
				RLTPR	0.857742	PPP4R1	0.96166	ADCY3	0.895578	PPP2R5A	0.913078					ACSM3	0.592214	SLC35D2	0.733524
				LOC285741	0.857306	NDRG1	0.959276	LOC392522	0.892952	CAPN2	0.912061					LOC646849	0.59204	CTSH	0.728946
				TECR	0.857094	ADAM15	0.958105	FBL	0.891549	BCL3	0.907779					OCRL	0.590672	CD226	0.72607
				TRAPPC2P1	0.856301	ELF4	0.957974	LOC100130746	0.890608	LOC399748	0.907649					FLJ38717	0.589854	ARPC5L	0.723505
				EFHB	0.856229	HES6	0.957848	SVIL	0.890584	DGKQ	0.907342					LOC653080	0.589299	PSMB8	0.719988
				CCDC66	0.855147	BUD31	0.956016	TSPAN33	0.890475	POTEF	0.906218					BZW2	0.5888	JAZF1	0.718465
				TRMT1	0.853928	RHOQ	0.955327	ZNF154	0.889491	RFTN1	0.901285					LOC641849	0.586887	CHMP2A	0.7171
				RPS23	0.851885	TSPAN2	0.954434	RPS23	0.889471	GFOD1	0.901254					AK5	0.585453	MAP2K3	0.716469
				PSMG4	0.851525	TMCO1	0.954292	LOC100132673	0.888684	DMWD	0.900145					UPF2	0.585183	MOBKL1B	0.716215
				ZCWPW1	0.851472	PLCB1	0.954033	LGTN	0.888584	CDK2AP2	0.89744					ZC3H12B	0.583722	CHST12	0.714314
				MSL3L1	0.850175	SSBP4	0.95208	ZIK1	0.887751	CHST7	0.89496					GNL3	0.583062	PTPLA	0.71357
				TGFBR2	0.849084	LOC650832	0.951332	PLEKHG4	0.884515	LSS	0.894914					MPP1	0.581653	CLTB	0.713204
				FAM159A	0.848977	OPTN	0.95063	ATP5L	0.884416	ZDHHC14	0.894071					LOC645688	0.581204	NETO2	0.712822
				MSL3	0.848748	FAM160B1	0.949675	TIGA1	0.884262	UBE2A	0.892178					CENPV	0.580638	CARD17	0.711534
				NUMA1	0.848292	CREB3L2	0.949663	MGC61598	0.883756	PSTPIP2	0.890817					STRADB	0.580497	PFN1	0.711046
				PPP1R3E	0.848239	TMX4	0.944767	LOC646949	0.88216	DYNLL1	0.888794					LOC730060	0.580173	CD2	0.710503
				SDCCAG3	0.848099	KIAA1600	0.941773	SNURF	0.880282	WSB2	0.888697					CACHD1	0.578409	ECT2	0.710423
				CLUAP1	0.84809	ERBB2	0.940342	LOC727865	0.879532	RAB8A	0.887863					SNORA7B	0.577527	GALK1	0.709965
				SNORD4A	0.844604	SDF2L1	0.940052	LOC100132804	0.878445	TUBA1C	0.885297					MGC52498	0.577259	RNF181	0.709914
				MRPL45	0.84109	UBE2A	0.939909	IL6R	0.87515	LOC648470	0.884994					LOC100129550	0.576903	PRNP	0.708451
				ZNF512	0.839936	ARPC2	0.935396	GIMAP2	0.874838	IL28RA	0.884479					LOC727865	0.576206	SLAMF6	0.707036
				UGP2	0.839572	EMP3	0.935324	UBAC2	0.873637	RAB5C	0.884106					TLE2	0.575858	TSPAN17	0.706204
				LOC654096	0.839025	EHD1	0.933432	LINS1	0.872939	FAM46A	0.883382					VAMP2	0.575302	SDF2	0.704904
				LOC646723	0.838427	ENPP5	0.933184	TMEM30B	0.872051	CHSY1	0.883362					LOC645737	0.57366	FUT7	0.70106
				LOC221442	0.837257	VIL2	0.930387	RPL23AP7	0.870353	MFSD10	0.882541					ILF3	0.572117	FABP5	0.699453
				TSPYL2	0.836001	MAP3K5	0.929827	EBPL	0.870277	MAP1LC3B	0.879741					HNRNPA0	0.571193	EIF4E2	0.698753
				LOC729992	0.835459	PRKCB1	0.928778	TMIGD2	0.869994	CD52	0.879104					LOC729332	0.570199	PPIL5	0.695572
				LGTN	0.834983	RAB8B	0.92792	LOC645715	0.869968	TUBA4A	0.878331					FOXP1	0.569884	CD79B	0.695415
				SNORD31	0.834192	CAPN2	0.926204	LOC341315	0.867031	HMGB2	0.878258					LOC100133773	0.568697	PIN1	0.69186
				ATP1A1	0.832197	ARL6IP1	0.925725	LOC654123	0.866311	PPP4R1	0.878111					LOC652607	0.568006	IQGAP1	0.691188
				RPS10P3	0.832172	CDCA7	0.924105	TIMM9	0.865653	DIAPH1	0.877441					PLA2G4B	0.567705	CAPNS1	0.688846
				LOC643949	0.831816	NAT13	0.921404	UBASH3A	0.864816	SFRS14	0.873737					ACACB	0.567409	IL12RB1	0.688507
				TTC3	0.83113	EZR	0.919721	LOC126235	0.863311	CD244	0.873269					LGTN	0.5673	AURKA	0.687977
				LOC731777	0.830575	NOD2	0.918801	LOC388556	0.861426	CFLAR	0.870829					NOG	0.567216	RAC2	0.686831
				FCGRT	0.829875	RPS6KA1	0.917124	ZCWPW1	0.860698	PFN1	0.869307					HIP1R	0.567007	CYB561D2	0.683959
				OCIAD2	0.829315	PRR5	0.916549	LOC401676	0.860666	PCBP4	0.868873					MKI67IP	0.566397	SNRPB	0.683504
				CEACAM1	0.828832	FYCO1	0.914565	RPLP0	0.860204	FYN	0.868863					LOC441896	0.565779	LOC644563	0.682232
				NUCB2	0.828253	CASP1	0.914053	AHCY	0.857419	P2RY5	0.868594					LOC643949	0.565665	ATP6V0D1	0.681247
				LOC646513	0.827578	GSTP1	0.911376	LYRM4	0.856281	CD3G	0.866728					PABPC1	0.565301	OSTF1	0.679809
				LOC646841	0.826694	BSG	0.90855	AKAP7	0.855994	BCAP29	0.86628					CTGLF3	0.565247	TP53I13	0.679292
				ASNS	0.826502	SNX10	0.902497	RPL28	0.855112	HLA-B	0.866106					LOC729608	0.56447	CMTM3	0.678215
				SNORD68	0.826112	TAP1	0.900944	AP1M1	0.854836	SH2D2A	0.863539					ZCCHC14	0.564268	MBOAT1	0.676638
				NDUFB1	0.825108	AKIRIN2	0.900676	GALR2	0.854305	TBCB	0.863131					LOC641518	0.562638	TSPO	0.67647
				ZNF581	0.825047	IKBKG	0.899792	ZNF274	0.853948	KEAP1	0.856993					LOC641848	0.562551	SMS	0.674736
				LOC728843	0.824509	GFOD1	0.899333	LOC645693	0.85337	CEBPB	0.856538					TSC1	0.562535	EHD4	0.673832
				NARG1L	0.824506	LILRB2	0.89912	KIAA0355	0.85331	TSEN54	0.856338					CTSF	0.5622	KIAA1671	0.673016
				LOC649839	0.824168	LASP1	0.895686	LOC728002	0.852449	PTGDR	0.855441					FAM113A	0.559697	ARL6IP1	0.672641
				CROP	0.823638	ITPRIPL1	0.895073	WDR6	0.850635	TP53INP1	0.855313					LOC728565	0.558399	TMEM93	0.67166
				WNT7A	0.822936	RAP1B	0.894842	ZNF10	0.850517	HSP90B1	0.855229					ZSWIM1	0.557913	LDOC1L	0.671271
				AKAP7	0.822431	ANTXR2	0.894129	LOC729484	0.850259	CLSTN1	0.854621					LOC400389	0.554259	RAB27A	0.669931
				H1F0	0.821892	APOBEC3C	0.893662	CLNS1A	0.848017	KIAA0182	0.851431					LOC401717	0.554105	FERMT3	0.669911
				FRAG1	0.821669	MT1A	0.893462	LOC400652	0.846428	HLA-H	0.851409					PCDHB9	0.553934	RPS6KA1	0.668268
				EIF3H	0.821551	STK39	0.892984	DCXR	0.845174	LDOC1L	0.849642					LOC728153	0.553645	KIAA0182	0.667516
				PPA1	0.820855	IFI27L2	0.892069	ZFAND1	0.841989	SNTB2	0.84939					LOC647030	0.553225	COMMD4	0.66699
				LOC652607	0.819401	PFN1	0.891396	LOC730167	0.840543	STK39	0.848119					ZNF669	0.552267	CAST	0.665805
				SVIL	0.818815	ARPC4	0.889845	TATDN1	0.8405	PLEKHO2	0.84396					LOC388907	0.550037	LOC100129118	0.662549
				TATDN1	0.818188	DNAJB11	0.889013	LOC286208	0.840281	AGTPBP1	0.840812					CCDC84	0.549459	CREB3L2	0.662257
				HEXDC	0.817252	ZMIZ1	0.886015	C1QBP	0.839704	SH3KBP1	0.839061					ZCCHC11	0.547641	HCST	0.661993
				LOC647673	0.817085	RRBP1	0.88496	NAT9	0.835272	BLOC1S1	0.839025					SMCR5	0.546826	PSMA6	0.661566
				LOC647285	0.816746	TMED9	0.884254	RSL1D1	0.833247	BSG	0.838892					BBX	0.542078	LOC650832	0.661324
				RENBP	0.8152	PIP5K2A	0.884196	LOC644889	0.833242	SH3GLB1	0.838652					ZNF271	0.540977	CAPN1	0.660166
				LOC641849	0.814434	TBXAS1	0.883247	STX16	0.833088	IER5	0.838473					LAMC3	0.540435	MAPBPIP	0.658069
				P2RY11	0.814386	PGAM1	0.882189	ETFB	0.832832	SSBP4	0.838463					ZYG11B	0.538845	SDF2L1	0.657971
				GIMAP2	0.814084	VAV3	0.881267	NDNL2	0.832544	GAPDH	0.837587					XPO6	0.53874	IFI35	0.656799
				SFRS18	0.812875	CAST	0.879815	EEF1B2	0.831497	PIK3CG	0.836851					LOC728640	0.53812	MFSD10	0.656431
				LOC650739	0.811321	ZDHHC14	0.875831	LOC729342	0.831204	GPR68	0.835949					MRPL45	0.533571	LOC646347	0.655924
				EIF3L	0.811158	LOC401115	0.873796	FBP1	0.830944	SELS	0.834138					FBL	0.532706	CFL1	0.653836
				DISC1	0.809732	MMP23A	0.872299	LOC100130233	0.830257	RBM39	0.833043					HNRPH3	0.532441	SCO2	0.652786
				LOC642738	0.80846	CRELD2	0.87198	LOC727997	0.829112	LDHA	0.83236					SSBP2	0.531474	MAD2L2	0.651613
				NFIX	0.808194	NMUR1	0.870083	FOXP1	0.82895	UBE2F	0.830618					RPF2	0.531262	RALB	0.650964
				LOC729742	0.80777	RPL39L	0.86951	LOC728188	0.827127	RGS19	0.830528					EIF3L	0.529701	NDUFB10	0.64919
				TMEM106B	0.80767	ELOVL6	0.868957	LOC100129673	0.825954	PYCARD	0.830304					LOC647074	0.529278	CEP78	0.6475
				LOC342994	0.807511	CFL1	0.867818	LOC388401	0.825757	CPD	0.830092					PDS5A	0.529236	SLBP	0.647413
				NAP1L1	0.807109	KYNU	0.867761	CNN3	0.821823	TPP1	0.829527					HIC2	0.528743	ARAP2	0.647066
				CKAP4	0.806911	TP53INP1	0.866679	LOC728820	0.82122	ATP6V1D	0.827566					KIAA0355	0.52804	SH2D1A	0.646743
				RGMB	0.806667	IDH2	0.861472	LOC100130624	0.820565	IQSEC1	0.826263					TRIM28	0.526587	MICB	0.645936
				LAGE3	0.806606	SEC61B	0.860086	SNRPN	0.819741	BRD2	0.82622					LOC100131989	0.526321	GUK1	0.645675
				MALT1	0.806359	BCAP29	0.860054	TRAPPC2P1	0.819532	MAP4K1	0.82618					SYNJ2BP	0.526099	CDCA4	0.645401
				HSF2	0.805679	CHP	0.858328	P15RS	0.818298	CKLF	0.824746					RPS10P3	0.524694	OAZ1	0.645275
				SNURF	0.80493	ITGA4	0.857014	TMEM42	0.818162	MBP	0.824573					LOC643882	0.524526	SKA2	0.642745
				ANKZF1	0.803615	ATP6V0B	0.856994	EDAR	0.81786	MAP2K3	0.822064					LOC643287	0.523409	PMVK	0.642607
				ADSL	0.803274	FBXW5	0.856399	GYPC	0.816464	PION	0.820355					SAPS2	0.523008	CASP8	0.642402
				TTC32	0.801128	TSEN54	0.855775	MRPL45	0.814761	ST6GALNAC6	0.819497					NOL11	0.522673	USP46	0.64062
				ALKBH7	0.801119	PHLDB2	0.853806	LOC100128410	0.814182	ADAM15	0.819375					CHCHD10	0.522591	SEL1L3	0.639745
				MX2	0.800343	SIGLECP3	0.852541	SSBP2	0.814053	DBI	0.816906					MKLN1	0.521551	PPP1CA	0.639671
				HDAC7	0.79923	MYO5A	0.852273	LOC728650	0.812667	LOC642233	0.816748					HIVEP1	0.519754	OGDH	0.638796
				PIK3CD	0.796865	CALR	0.85183	NAP1L1	0.812648	DERL1	0.816686					ELP2	0.519708	PTPN7	0.638117
				CHCHD10	0.7966	CCPG1	0.849935	PIP3-E	0.812436	LTB4R	0.815819					LOC220686	0.51873	SPATS2L	0.637599
				HNRPDL	0.796216	PTPN7	0.849452	RDH14	0.811652	FAS	0.815555					LOC643308	0.518491	PRKCD	0.636973
				ID3	0.795575	FCRLB	0.848485	EDG4	0.811235	RPL39L	0.814179					EIF3H	0.51675	TEX264	0.63693
				CASP6	0.79412	GALC	0.848281	DHX32	0.810893	TNFSF12	0.813129					ZNF30	0.516713	ISG20	0.636728
				LOC646942	0.793371	DIAPH1	0.845794	LOC391655	0.808732	IL32	0.811345					LOC100129067	0.51575	LOC732007	0.636398
				SSBP2	0.792779	DNAJB6	0.845378	LOC100134018	0.807667	ENPP5	0.811072					HNRNPH3	0.512813	PSMB3	0.63497
				ESD	0.7918	MAPKAPK2	0.845358	LOC390876	0.807043	ADCY9	0.805325					MMS19	0.509813	MFSD5	0.634449
				LOC646785	0.790841	LOC100131940	0.844842	FAM162A	0.805282	ABCA2	0.804589					RBM12	0.509376	ILK	0.633242
				DARS	0.78672	UBE2F	0.843799	LOC338799	0.805217	DNCL1	0.801495					CYP2J2	0.509049	TXNL2	0.631813
				CDC16	0.785603	ARSD	0.842056	LOC158345	0.805173	KIAA1600	0.797985					LOC100127893	0.508847	LOC650518	0.630658
				DNAJA3	0.785471	RALB	0.841735	LOC647074	0.805158	LILRB1	0.797282					LOC100130053	0.507844	RAB7L1	0.630063
				NBPF14	0.784916	CPVL	0.840659	LOC441114	0.804957	KIF13B	0.795352					WDR59	0.507479	PSMA3	0.629888
				PCYOX1L	0.784832	ZNF296	0.840541	LRCH4	0.798711	TSHZ3	0.794844					PBX2	0.507032	DBI	0.627676
				MGC52498	0.784406	HLA-F	0.838989	TRAPPC6A	0.798239	MYD88	0.794115					PAPD5	0.50664	TBCB	0.626596
				NECAP2	0.784376	RFTN1	0.835599	LOC441506	0.796635	SMC4	0.794014					THOC1	0.506368	TMEM111	0.626371
				LOC100134540	0.78381	PTRH1	0.835207	LOC646350	0.796481	ITPRIPL1	0.79263					FBXO11	0.503237	FBXO6	0.624279
				SEPN1	0.783128	CKLF	0.834266	GCA	0.795975	MAFF	0.789283					LEMD3	0.50044	COMTD1	0.62418
				FAM100B	0.782234	ABHD15	0.834263	ALDH5A1	0.795815	HLA-E	0.788511					LOC92249	0.49873	TANK	0.623954
				LOC731542	0.781416	ATP6V0D1	0.833775	LOC642738	0.7926	SRGN	0.787359					ZNF786	0.49655	THOC4	0.623018
				FAM184A	0.780371	RNF167	0.833538	G3BP2	0.791447	PDXP	0.787317					LOC646909	0.495968	CHN1	0.621945
				LOC441896	0.779759	POMP	0.833465	SERINC5	0.790006	LOC650034	0.787011					LEP	0.494235	STX8	0.620346
				FLJ13197	0.779466	IFNGR1	0.833213	LOC100132658	0.789025	IL12RB1	0.784429					LOC100131675	0.493867	ADRM1	0.620255
				ZNF154	0.777218	MBNL2	0.832973	APBB3	0.788245	FNDC3B	0.783593					ZNF789	0.488982	CALHM2	0.61977
				HIVEP1	0.77432	MAD2L2	0.829647	LOC339192	0.7875	DDX39	0.783523					ZNF500	0.48867	SRP19	0.617198
				CICK0721Q.1	0.774241	PPP2R5A	0.826307	LOC100133773	0.787246	CMTM3	0.781776					LOC100134504	0.48867	PYCARD	0.617123
				PUS1	0.77344	GPR137B	0.826115	LOC100131085	0.787014	RARRES3	0.781698					SLC25A37	0.484572	ITPRIPL1	0.616866
				LOC146053	0.773025	SLC25A43	0.82611	HMHA1	0.786937	CREBBP	0.78161					KIAA0495	0.484127	FAM96B	0.614689
				ZNF395	0.772968	LOC728138	0.825781	RASA1	0.784994	RNF19A	0.781594					HK2	0.483739	PTPRCAP	0.614458
				LOC728820	0.772217	RAB11FIP1	0.825548	SNORA24	0.784955	MMP23A	0.781362					KBTBD9	0.482956	FAM58A	0.614153
				TCEAL2	0.77133	MYD88	0.821088	LOC147727	0.784895	CALR	0.781325					FAM44B	0.482426	DDX19B	0.614057
				GPX4	0.77012	PSMB9	0.821038	CBR3	0.784646	TROVE2	0.781161					TMEM70	0.482116	SPCS3	0.611904
				PPAP2A	0.769924	CHST7	0.819431	LOC643960	0.783727	DNAJB6	0.780753					TYW3	0.48014	ARPC2	0.611088
				CNN3	0.769697	PAFAH2	0.819326	P2RY11	0.782201	ZDHHC18	0.779889					INTS3	0.479744	SQRDL	0.609319
				LOC653702	0.769398	CD97	0.81785	LOC100131205	0.781221	ZNF509	0.779797					UXT	0.478907	CAPN2	0.605577
				LOC100130802	0.768315	POTEF	0.81649	LOC100128252	0.780503	INPP5D	0.779686					MMS19L	0.478657	TMED1	0.603609
				GCA	0.768106	LOC653888	0.812124	FXYD5	0.779348	PRC1	0.778867					LETMD1	0.478101	STK39	0.603464
				LOC441013	0.767925	CAP1	0.810814	CENPV	0.777665	FHOD1	0.777907					LOC729677	0.477902	ZMPSTE24	0.602725
				GPR160	0.767426	KIAA1539	0.8103	ZNF165	0.776815	APOB48R	0.77756					LOC729120	0.476394	SHFM1	0.6021
				LOC647074	0.767281	LOC728969	0.810248	HPCAL4	0.775302	PICALM	0.776633					RPS6KB1	0.474591	TRAPPC1	0.601905
				MRPS33	0.766771	BLVRA	0.810225	LOC440487	0.773982	GALC	0.776158					THOC2	0.473524	METRNL	0.600714
				C2CD2	0.766713	P4HB	0.810047	LOC729332	0.773639	LOC440043	0.775801					KLHL2	0.47345	RACGAP1	0.600053
				GCHFR	0.766582	RNF149	0.805722	LOC644907	0.772132	PHF13	0.775401					LOC729342	0.471661	TMX4	0.600038
				SLC25A23	0.766092	PIK3CG	0.804402	NDUFB5	0.771824	ZNF364	0.775341					CAPN7	0.471438	RYR1	0.599769
				ZCCHC14	0.765545	PTP4A2	0.804085	FBXL16	0.769682	GNAI2	0.774667					SLC22A23	0.471191	DNAJB11	0.59968
				LYSMD4	0.76477	EPS15	0.803858	LOC644315	0.769045	PXN	0.773307					MGEA5	0.47021	SKAP2	0.599322
				RASA1	0.764579	HMGB2	0.800717	ADK	0.768848	MYO5A	0.772867					MTR	0.469701	DYNLRB1	0.59895
				ALDH5A1	0.764415	VCPIP1	0.800708	OGT	0.76687	CCL4	0.772015					P2RY11	0.467871	LOC100129034	0.598234
				AMT	0.763857	ZBTB43	0.800407	ZNF671	0.764451	UHMK1	0.769554					LOC729208	0.464847	DEF8	0.596991
				LYRM7	0.763336	PDIA3P	0.800232	PABPC3	0.764242	MRPL10	0.769475					CLEC11A	0.463393	GIYD1	0.596968
				KIAA1147	0.762808	FOXD2	0.799849	LOC651894	0.763064	PLCB2	0.768496					LOC100132037	0.460328	UBE2A	0.596141
				CD248	0.761492	TBCB	0.799767	LOC342994	0.763009	RPS6KA4	0.767398					LOC646278	0.45907	FBXW5	0.595941
				ZNF518B	0.761045	FAM46A	0.79839	ARL2	0.762139	PRKCB1	0.767269					ZNF577	0.456364	GPRIN3	0.59508
				LOC345041	0.760789	HLA-H	0.798062	PIGP	0.760711	TSPAN5	0.767251					ACVR1B	0.455656	B4GALT3	0.595008
				IL23A	0.7592	WIPI1	0.797349	STRADB	0.76019	SLC1A4	0.76588					LRIG2	0.455655	RNF149	0.59318
				LOC391811	0.756843	CYP4F22	0.796309	CACHD1	0.759462	IFITM2	0.765324					TTC37	0.455545	PTPN4	0.593147
				LOC442270	0.752518	CDKN2D	0.79605	LOC441154	0.7593	CAST	0.765259					NFX1	0.451766	BARD1	0.591538
				FOXK1	0.751822	APOB48R	0.793615	LOC644172	0.758401	TMEM120A	0.763365					LOC650737	0.451578	LOC100131940	0.591099
				ACVR1	0.75181	TXNDC17	0.793613	LOC644037	0.758306	GLTP	0.763051					DCBLD2	0.451538	RIPK3	0.590997
				LOC645968	0.750966	TPP1	0.792906	LOC729780	0.757666	RABGAP1L	0.76213					CCDC125	0.44989	PGAM4	0.589122
				LOC730288	0.750075	PPP1CA	0.790749	OXNAD1	0.753989	SLC10A3	0.76076					CUL9	0.449325	PEA15	0.586468
				LOC399804	0.749857	INSIG1	0.789933	LOC441896	0.752914	P4HB	0.759959					LOC100129599	0.448608	SS18L2	0.586136
				HSPB1	0.748309	TMEM9B	0.788606	LOC100128836	0.75165	EIF5A2	0.759095					LOC100132499	0.446891	PSMC3	0.585727
				LTA4H	0.747708	MGC16384	0.787927	CSTF3	0.749459	HMGB1L1	0.758331					DIP2B	0.440566	LASP1	0.585672
				PLCL1	0.747228	LOC401076	0.785869	RENBP	0.748397	OBFC2B	0.758224					CR2	0.43848	SP140	0.584778
				LOC728554	0.746931	ADIPOR2	0.783839	LOC645688	0.748333	LOC100134537	0.758095					NACA2	0.436032	MRPL14	0.584381
				LOC100132707	0.746506	CDCA4	0.781213	HIVEP2	0.747247	NAT13	0.757713					INPP5A	0.434684	LYL1	0.584135
				LETMD1	0.746486	AGTPBP1	0.779388	MAP4K2	0.746214	ADHFE1	0.755994					ZNF773	0.432725	APOBEC3F	0.584129
				APEX1	0.741838	LOC728059	0.778469	MYL5	0.745699	ARHGAP25	0.755982					SPEN	0.431981	PARD6A	0.583364
				NPAT	0.741575	SLC35B1	0.778206	GNG7	0.743372	MAST3	0.75585					RPL4	0.430451	PHTF1	0.58057
				UBQLN2	0.741293	PYCARD	0.773798	LOC731096	0.742798	KBTBD2	0.75544					MYL5	0.421529	CYBA	0.58047
				RPL34	0.740113	RAB8A	0.772464	LOC401677	0.742657	HSPA6	0.754242					ZNF182	0.414978	CDKN2C	0.580278
				ZNF586	0.739039	RPN1	0.771764	TSPAN18	0.738657	VGLL4	0.754152					ZMYM4	0.411408	SLC35A2	0.580221
				ZNF548	0.738972	RNF19A	0.7716	SLC15A3	0.738139	ANKRD13D	0.754045					FMNL3	0.397907	PSMA4	0.57846
				CUL9	0.738947	HLA-DPB1	0.77144	MFAP4	0.737543	LOC391075	0.753889					LOC729742	0.393997	GSTK1	0.578375
				HPCAL1	0.738674	LOC399748	0.771088	LOC401717	0.737534	LOC644677	0.752154					GNA11	0.391759	CSRP1	0.577735
				RHOH	0.737013	MAP1LC3B	0.770271	SETD1B	0.737338	RPN1	0.752061					LOC645944	0.389845	DUSP16	0.577485
				RPL4	0.736025	IFIT2	0.768579	NACAP1	0.736956	LOC650832	0.751666					OAF	0.373724	RBM18	0.577028
				ZNF275	0.735358	SLC25A4	0.76752	LOC649839	0.736369	DNAJB11	0.751274					TGFB3	0.362058	SRXN1	0.576458
				KCNIP3	0.733264	SDF2	0.767475	PUS1	0.736208	STARD7	0.75072					TMEM18	0.361418	SLC35B1	0.576257
				SECISBP2	0.732975	SPCS3	0.766631	LOC648249	0.735124	NPTN	0.750184							ZYX	0.574724
				LOC646909	0.732655	PPP3CA	0.765345	ZNF581	0.734238	LUZP1	0.749874							HIGD1A	0.574554
				ITK	0.728856	TSPAN17	0.765204	LOC100132199	0.733841	LOC644695	0.74986							EBP	0.574085
				EEF1G	0.728042	PLIN2	0.765118	WWP1	0.733668	AKIRIN2	0.74973							KATNAL1	0.572449
				PDXK	0.728022	PLOD3	0.76511	LOC100128056	0.732538	TAGLN2	0.74821							SLC3A2	0.572052
				HSP90AB1	0.727549	IL28RA	0.763285	DBNDD1	0.732496	LOC283267	0.747894							TMED9	0.569931
				BCL9	0.72752	PDXP	0.762507	LOC646688	0.731813	HSPA1A	0.747403							PSMB10	0.566688
				NUP160	0.726588	CCDC112	0.75944	LOC647673	0.731462	DUSP8	0.746934							YIPF3	0.566002
				CSTF3	0.725939	ACTB	0.759283	HIF1A	0.731062	CTSD	0.746271							LOC440895	0.565109
				LOC100129952	0.725814	ATL3	0.759152	LOC727821	0.730702	SDF2L1	0.746031							PFKL	0.563733
				ZNF550	0.725399	FAM49B	0.757799	H2AFY2	0.72813	FCRLB	0.745082							PTPN22	0.563187
				RPL37	0.722489	ACOT7	0.757617	EIF3H	0.727685	GSTP1	0.743666							WIBG	0.560994
				LOC100127893	0.722476	GUK1	0.755333	KIAA1147	0.727309	SLC35B2	0.743561							EZH2	0.560733
				LOC729332	0.721567	LOC283267	0.754795	LTA4H	0.727004	RAB11FIP1	0.742187							A2LD1	0.560573
				EFNA1	0.721468	LOC650152	0.754299	LOC727818	0.726926	LOC642909	0.741767							PRDX4	0.559268
				RBM26	0.720239	SPIN4	0.753954	CASP6	0.726175	AP2B1	0.740959							RAB35	0.557582
				LOC729677	0.719717	MYADM	0.753183	LOC642250	0.725481	FBXW5	0.740582							ARHGDIA	0.556677
				LOC388907	0.719654	SKA2	0.75302	U2AF1L4	0.724956	SSBP3	0.740435							TMEM116	0.556169
				XPO6	0.718351	TACC1	0.752725	TMEM70	0.724846	ATL3	0.739745							LOC100129086	0.555863
				SPG7	0.716852	LOC100131768	0.752156	LOC729679	0.723563	STT3A	0.738921							PPP2R5C	0.554957
				CLDN15	0.716697	EDARADD	0.750148	LOC649447	0.722277	SHC1	0.738686							CCDC53	0.554505
				LOC727865	0.716124	DCAF7	0.748115	LOC100133185	0.722214	KIAA1539	0.73789							TICAM1	0.552755
				MYH3	0.715837	FKBP11	0.745173	EEF1A1	0.721928	MTF1	0.737459							ITGA4	0.552679
				TRIB2	0.715258	PLEKHO2	0.743586	LOC100134540	0.721483	HCST	0.735271							SLC10A3	0.552672
				SCARNA21	0.714537	HLA-B	0.743272	LOC391825	0.721067	NDUFB7	0.734778							SLC41A3	0.551306
				LOC158345	0.71254	CIDEB	0.742383	LOC127295	0.720156	GPR137B	0.73447							LOC387934	0.550123
				LOC729760	0.712312	PCNA	0.741141	HAPLN3	0.719606	MXD1	0.734142							RAP1GDS1	0.549804
				LOC653778	0.712294	TMED5	0.739617	RPL10A	0.719298	CASP8	0.733838							HMGN4	0.549082
				NACAP1	0.712147	IFI16	0.739612	PGRMC2	0.718986	AKT1	0.730674							CHN2	0.548972
				LOC643308	0.712101	LOC653566	0.739186	LOC649209	0.718561	LOC728969	0.730361							TOR3A	0.547979
				CABC1	0.711518	DENND3	0.738011	RPL37	0.718239	TNFRSF1A	0.729288							PQLC3	0.546814
				STAT5B	0.710837	MGAT2	0.737171	TIPARP	0.717208	DCAF7	0.729096							LOC729841	0.54617
				RPL28	0.708431	LOC732007	0.736496	FAM89A	0.717185	BUD31	0.725498							EIF3A	0.545362
				LOC440498	0.708385	TLN1	0.735668	DNAJA3	0.717157	KCTD20	0.725344							LOC151162	0.545254
				LOC648103	0.708278	TNFSF14	0.734749	PAQR8	0.716814	TP53BP2	0.722542							MARCH2	0.544718
				PAFAH1B3	0.706788	MFSD5	0.733532	LOC643433	0.715867	RNF115	0.722389							PCBD1	0.543175
				HK2	0.706129	DERL1	0.732713	KLHL6	0.715595	EIF4EBP2	0.721695							ELF4	0.539932
				KLHL29	0.704338	WEE1	0.729291	CYB5A	0.715112	BCL6	0.718274							CTSA	0.539511
				LOC440487	0.704074	FOXO4	0.727158	ACSM3	0.714815	LOC646316	0.717127							COPE	0.539394
				GNL3	0.702734	PSMB2	0.726851	AQP12B	0.714637	SLCO3A1	0.717078							TAGLN2	0.538942
				PTDSS1	0.702074	SLCO4C1	0.726124	GPX4	0.713952	UBL3	0.715888							TMEM9B	0.5386
				GNG7	0.701517	ARSA	0.725457	LOC647285	0.713886	HEG1	0.715049							GLTP	0.538103
				LOC388707	0.701505	GNGT2	0.724044	STMN3	0.713656	PHLDB2	0.71502							ARD1A	0.537337
				LOC645737	0.700738	PLEKHA5	0.723179	FAM32A	0.710757	SLC25A25	0.714896							PSME1	0.537139
				ZRANB2	0.700653	SYNE2	0.722827	HSD17B8	0.71038	FERMT3	0.712952							CACNB3	0.536146
				PPAPDC2	0.697172	VPS26A	0.722056	RAB43	0.710317	KIF1B	0.711793							TOM1	0.534574
				NOL11	0.696328	CORO1C	0.7218	APBA2	0.710222	MIDN	0.711372							ARMET	0.534289
				LOC647030	0.694422	LOC650518	0.721557	SMPD1	0.709497	PRKCB	0.711356							OAS1	0.531428
				P15RS	0.693939	PHF21A	0.720919	LOC285741	0.70824	CALM1	0.710769							LOC653566	0.527717
				AKTIP	0.692724	MSC	0.720752	SLC7A8	0.708212	GPR108	0.710668							LOC400759	0.527449
				INPP5A	0.691948	GTDC1	0.720275	COL6A3	0.708193	MACF1	0.70954							NIPA1	0.527174
				ACAD11	0.691672	WDFY1	0.717825	LOC729769	0.707426	PLOD3	0.707783							ARAP3	0.52705
				FAM156B	0.690801	SLBP	0.717348	BSCL2	0.705201	CYB561	0.706987							STX5	0.52691
				LOC644949	0.685004	MEGF9	0.716355	FYTTD1	0.704847	NOMO2	0.706131							DSTN	0.526744
				OXA1L	0.683269	KIAA2013	0.715339	APEX1	0.704422	CBX6	0.703934							ITGB2	0.525327
				ICAM2	0.682886	IL15	0.713756	LOC100133008	0.703825	ARL5A	0.703653							LOC642590	0.524279
				HSPD1	0.682216	AIM2	0.713391	EIF3M	0.703442	LOC196752	0.703224							FAM96A	0.521361
				FNBP4	0.681759	HN1	0.712357	SNORD104	0.701993	VAV3	0.702599							COMT	0.514952
				SCNN1D	0.681667	MICB	0.711311	CHCHD10	0.701803	ZBTB44	0.702442							H2AFJ	0.514312
				CENPV	0.680084	TMEM111	0.711284	POLR1E	0.70108	GMNN	0.702315							SPSB1	0.51407
				FLJ31306	0.679951	ITGA5	0.709887	LOC642989	0.700899	MKNK2	0.701759							RAB8A	0.514016
				GALT	0.678813	COMMD4	0.709857	LOC388122	0.700683	LOC644846	0.701578							ZNHIT1	0.513469
				STRADB	0.678197	SSBP3	0.70931	CYP2J2	0.699659	CDKN2D	0.701054							STXBP2	0.513191
				ZNF75A	0.678003	IER3IP1	0.708266	KCNIP3	0.699494	SEC11C	0.700525							KEAP1	0.511358
				ZFAND1	0.677509	RDH10	0.708011	HEBP1	0.696907	MYL6	0.700241							SIT1	0.511225
				ZC3H12B	0.676553	GCLM	0.707834	CECR5	0.696503	PTS	0.699156							BRMS1	0.510121
				DNAJA4	0.676242	FUCA1	0.707384	LOC643949	0.696325	TTC13	0.697878							SNX24	0.508767
				LOC653079	0.676242	CALM1	0.70731	URG4	0.695819	TMEM87A	0.697241							YIPF1	0.507526
				DAGLB	0.675751	ST8SIA4	0.706007	LOC441642	0.695766	SF3B2	0.696315							ATP6V1E1	0.507504
				RNF138	0.674592	CD6	0.70556	RPL7	0.695153	RAB35	0.695494							TTL	0.505548
				MRI1	0.673176	GNS	0.705374	FAM44B	0.694068	FBXW7	0.695333							P4HB	0.504991
				LOC401717	0.672276	KCTD6	0.705361	TSPAN3	0.69357	ZNF142	0.695012							LOC730455	0.5032
				ZNF671	0.672204	IQCG	0.704884	DUSP16	0.690751	FOXO3	0.694181							CYB5B	0.503126
				GEMIN4	0.671933	ANXA4	0.703643	LOC731777	0.69013	NIPA1	0.693588							PPM1G	0.502954
				LOC100129067	0.671362	CCDC92	0.703438	MYST1	0.689628	DNAJC1	0.693199							CYB5R3	0.50235
				PCMTD2	0.671174	DNASE2	0.703374	SMAP2	0.688695	PDIA3P	0.691365							PGRMC1	0.502306
				IFNAR2	0.670752	LOC100129086	0.701587	ESD	0.688021	BCOR	0.691352							PLK4	0.501056
				TMEM70	0.669268	XPNPEP2	0.701389	LOC100131675	0.68744	IFI16	0.691174							CCDC90A	0.500501
				ZNF629	0.66864	PDLIM5	0.700337	LOC642035	0.687109	NEU1	0.690779							TMEM205	0.498762
				LOC652670	0.66854	ACOT9	0.699179	SUCLG2	0.685186	TMED5	0.690724							ABCA2	0.497566
				LOC728650	0.666073	UBE2E3	0.698934	RPIA	0.68452	MYH9	0.689859							H3F3A	0.496722
				LOC388564	0.665204	SLC10A3	0.697395	LOC100127999	0.684409	WEE1	0.689184							IL12A	0.496352
				LOC729686	0.664074	PAIP2	0.696498	SIVA	0.682928	FOXD2	0.689049							ANXA2P3	0.496306
				REV1	0.66277	GPR172A	0.696244	FBLN5	0.681276	MRLC2	0.688687							FANCG	0.495609
				EIF3D	0.662742	LOC284757	0.696187	ABCG1	0.68118	TSPAN2	0.688388							LOC440926	0.495531
				MRPS21	0.662367	CCDC102A	0.695311	SLC7A3	0.681144	RPS6KA1	0.684612							ITPRIPL2	0.493417
				TRIM28	0.661987	NPTN	0.694149	SAE1	0.68029	KLF10	0.683218							NFKBIB	0.493319
				LOC644937	0.661785	NACC2	0.693778	ZNF681	0.680188	GLT25D2	0.682969							BRP44	0.492258
				SAE1	0.661078	FHOD1	0.693669	PRDX6	0.679636	PODN	0.682547							PCK2	0.490176
				LOC401677	0.660518	CRADD	0.692691	LOC389156	0.679513	APOBEC3F	0.682187							LOC650152	0.485516
				LOC387825	0.659759	SPCS2	0.691821	LOC100129934	0.679218	CACNB3	0.681457							LOC728368	0.485167
				ELP2	0.658937	UBB	0.691589	ACADM	0.679206	LOC650152	0.680014							TMED5	0.485085
				RPL12	0.656829	ACSL5	0.691196	LOC729742	0.679076	ZDHHC7	0.679228							ITGAM	0.484664
				LOC731096	0.656216	EFR3A	0.689365	RPL9	0.679069	TMCC3	0.679061							TM9SF2	0.484246
				ZIK1	0.655987	RAC2	0.6885	LOC100130562	0.678311	AXIN1	0.675812							ATP5B	0.481785
				MFAP4	0.655138	RNF19B	0.687727	TECPR1	0.678305	LY6E	0.674624							NEDD8	0.480371
				IL16	0.653646	GNAI2	0.686155	ACACB	0.677997	BRPF1	0.674547							DNAJC9	0.476753
				FAM195A	0.653108	ROBLD3	0.685697	LOC642357	0.677016	PGAM4	0.673494							BOLA2	0.472866
				LOC391578	0.652628	CMTM3	0.683025	SNTA1	0.676484	TLN1	0.671998							PPP1R7	0.472191
				LOC648405	0.651363	RHOA	0.682631	NHP2	0.676424	ABHD15	0.671429							LAMP2	0.471664
				LOC642989	0.651274	MAN1A1	0.682204	LOC100131735	0.675912	DIAPH2	0.670599							GTDC1	0.471619
				WDR75	0.651028	FAM82A2	0.681981	CNIH	0.675173	WIPI1	0.669882							TRIM26	0.46916
				MTRF1	0.650616	RARRES3	0.6798	INPP5A	0.674036	DKFZP586I1420	0.669506							OTOF	0.462462
				CEP110	0.649061	SPIRE1	0.679732	LOC388707	0.673946	ARMET	0.668856							TCEB3	0.461656
				LOC646688	0.649047	PSAP	0.679427	ST13	0.673833	KIAA2013	0.666765							DPH3	0.458522
				MTX3	0.646269	PRKAR1A	0.679361	TAF1D	0.67374	TMED2	0.666739							TRIM11	0.453932
				NMT2	0.646091	AGTRAP	0.678931	LOC402342	0.673097	ANAPC1	0.66573							NLRP3	0.451521
				NISCH	0.645908	ELMO2	0.678629	LOC388275	0.672929	SLC35B1	0.664947							TRIOBP	0.45078
				SDK2	0.644568	PRKCB	0.678552	CLUAP1	0.670756	ACSL4	0.664173							TUBB4Q	0.450387
				LOC647389	0.643528	ZBTB44	0.678058	LOC100133328	0.670719	RAC1	0.66397							DGCR6L	0.445772
				GGTL3	0.642222	CASP4	0.677792	LOC389599	0.670359	TMEM184B	0.663841							DCTN2	0.438992
				TDRD1	0.641999	GALM	0.672463	LOC728782	0.668785	TACC1	0.663616							CASK	0.438781
				NINJ1	0.641485	SUB1	0.672269	LOC440055	0.668005	KLF13	0.663233							PDE6D	0.436614
				PBX2	0.641015	TMX1	0.672092	MRPS33	0.667552	AGTRAP	0.662003							SLC38A10	0.435415
				LOC100130746	0.640515	TMEM109	0.670207	SCARB2	0.667244	TMEM50A	0.661561							GLA	0.434627
				LOC644029	0.640321	HIGD1A	0.667414	LOC729798	0.665953	LOC285074	0.660482							DGCR6	0.431577
				LSM5	0.639773	DAB2	0.667272	TCEAL8	0.665399	IKZF3	0.660282							FAM108C1	0.43011
				LOC389641	0.639439	DIAPH2	0.666774	LOC388907	0.665393	IL1R2	0.658831							RORA	0.4277
				LOC100129685	0.639062	TMEM87A	0.66668	LOC100128888	0.66535	KIF22	0.658733							RHOA	0.427672
				LOC100131675	0.63736	FASLG	0.666464	LOC646942	0.663141	TMED9	0.657172							NHLRC2	0.422657
				SCARNA13	0.63726	ZNF668	0.665848	MGC39900	0.662788	GNGT2	0.656786							HLA-DPB1	0.420247
				LOC387791	0.636349	STX8	0.665561	SCARNA21	0.662616	PHF21A	0.65523							MYH9	0.419958
				ACSM3	0.636026	EIF5A2	0.665172	FOXO1	0.662306	CYB561D2	0.654537							RNF19B	0.417773
				GCET2	0.635294	SCD5	0.664413	FYB	0.660869	POP7	0.65446							LOC441089	0.414127
				OBSCN	0.634188	YWHAZ	0.66372	ACCN2	0.66077	FAM82A2	0.654447							PARK7	0.412256
				PBX4	0.633944	BZRAP1	0.66319	STRBP	0.660402	CLPTM1L	0.653764							KIF5B	0.406495
				EIF3E	0.633809	TMED2	0.66297	DCK	0.658864	TOR1A	0.652975							SF3B4	0.400115
				C1QBP	0.632575	CD53	0.66267	CLYBL	0.658491	FUCA1	0.652477							BCAP31	0.39734
				RAB3IP	0.632264	SH2B3	0.662151	LOC442232	0.657849	MPST	0.652181							MYO18A	0.394392
				TIMM9	0.630437	CTDSP1	0.661526	CMTM7	0.65721	WDFY1	0.650055							SAMD9	0.390166
				TLE2	0.630324	LOC151579	0.661125	LSM2	0.65719	COL6A2	0.648914
				TNK2	0.630239	VGLL4	0.660808	LOC644029	0.657112	MTPN	0.648783
				NDE1	0.628973	PGAM4	0.659582	UCRC	0.65482	CIDEB	0.648457
				CEP68	0.627634	SLC16A3	0.659153	LOC100129139	0.654616	LOC653566	0.648395
				MARCH3	0.627541	SP140	0.657632	CARS	0.654228	SCD5	0.648089
				RNF144	0.627253	SUPT4H1	0.657326	NBEA	0.652504	CCDC49	0.648044
				LOC100128056	0.62655	RAC1	0.656923	NFIX	0.651948	UBB	0.648016
				MMS19L	0.626361	FERMT3	0.656003	MTX2	0.648894	SAMD9L	0.647297
				ZNF204	0.624427	SH2D1A	0.655594	POP5	0.648827	LOC54103	0.644854
				LOC644511	0.623848	TMED10P	0.655342	LOC401537	0.648414	GNS	0.644699
				RPS5	0.622255	DNAJC1	0.655246	FGD3	0.648085	PLEKHA1	0.644331
				LOC730051	0.62167	PCBD1	0.654211	LOC653079	0.647867	CALHM2	0.643504
				LOC440927	0.621059	KIAA0913	0.653541	HSPBL2	0.64633	TMEM189-UBE2V1	0.642705
				NPAL3	0.620521	PAQR4	0.650886	LOC346887	0.644183	SPIN4	0.640106
				SNRPN	0.620499	ACTR1A	0.650648	TPST1	0.643995	KCTD6	0.639239
				ROBO3	0.619894	OSBPL3	0.650489	RING1	0.643807	LOC221710	0.637908
				ASAP1	0.618136	PCAF	0.649612	LAPTM4B	0.64368	EMB	0.637907
				LOC729510	0.617025	ROD1	0.648582	LOC646909	0.643234	VPS18	0.637123
				LOC652637	0.616988	TPM3	0.648133	TCEA2	0.643042	GOLGA7	0.637081
				THOC3	0.616256	KLHDC4	0.647595	MAD2L1	0.642367	LAMP1	0.636752
				ST13	0.615105	ISOC1	0.647421	ACVR1	0.640554	NOMO1	0.635217
				LOC727997	0.614741	LOC100134728	0.646655	LOC645157	0.637753	SPCS2	0.634969
				SNORD38A	0.614234	ARL6IP5	0.64595	KAT2A	0.636987	PLIN2	0.634911
				RBM17	0.614067	TNFSF12	0.645859	NDUFAF2	0.636448	G6PD	0.634727
				TTC14	0.613367	ZNF319	0.6456	PDCD2	0.6363	ANXA4	0.633753
				FLJ40504	0.612424	LAMP1	0.641699	ZNF69	0.635994	CCPG1	0.632336
				ERGIC3	0.611503	TAF1B	0.641297	COX7A2L	0.634574	PIP4K2A	0.632008
				LOC388588	0.611265	MLEC	0.639698	HNRPDL	0.63348	LOC730052	0.631057
				LOC648343	0.609514	UNC84B	0.639516	CHCHD7	0.632849	CDCA4	0.630941
				IL7R	0.609113	APOBEC3D	0.639288	VEGFB	0.632838	TRPC4AP	0.63073
				NBL1	0.607319	HMGN4	0.638494	WNT7A	0.63214	TBCD	0.630606
				SNORA7B	0.607147	PTPRCAP	0.637794	LOC100129585	0.630834	MGC72104	0.629687
				ZYG11B	0.606022	CYC1	0.637268	LOC550643	0.63028	CCDC107	0.629156
				LOC642852	0.604612	LOC100130308	0.633779	LOC652607	0.629773	TRPV2	0.62911
				WDR59	0.604409	PSMB8	0.633597	CCDC71	0.628516	LOC653157	0.628421
				LOC100128196	0.604007	TRPV2	0.631916	KIAA0391	0.628442	DNAJA1	0.627694
				LOC147727	0.603386	CCDC107	0.630443	GEMIN4	0.627751	TAP2	0.627354
				PQBP1	0.601014	NIPA1	0.628673	PPT1	0.627189	ADAP1	0.624811
				ZNF681	0.600091	OAZ1	0.6274	IFP38	0.626414	DPP9	0.624564
				CLN5	0.599955	LATS2	0.627151	PCYOX1L	0.626335	SIRT2	0.62452
				EXOSC5	0.599754	LOC644330	0.626138	LOC729423	0.625653	LOC730455	0.624307
				PSIP1	0.599717	PDLIM1	0.625808	PLCG1	0.624774	RAB9A	0.623755
				FLJ45244	0.599379	CMIP	0.623303	CHMP7	0.624307	LLGL2	0.623498
				ALDOC	0.599285	GTF3C6	0.622629	MRPL3	0.623705	EXTL3	0.623486
				LOC644745	0.598235	TMED1	0.621478	LOC100131526	0.621975	MAD2L2	0.623001
				OCRL	0.598191	CD3D	0.621373	LOC100128196	0.621704	FBXO5	0.622759
				EIF3G	0.597284	GOLPH3	0.619612	IL23A	0.621387	LMO4	0.620596
				ZNF577	0.59677	COMMD8	0.618698	LOC345041	0.620856	TP53I13	0.620417
				LOC100134648	0.596509	CACNB3	0.618695	HSPD1	0.620446	SLBP	0.619968
				PER2	0.595942	TNFRSF1A	0.618681	DCAKD	0.619892	SGCE	0.618965
				SNHG6	0.59576	CCDC90A	0.617038	EIF3E	0.619656	NOD2	0.618349
				MTMR15	0.593194	ZNF509	0.616661	LOC401640	0.618329	ASB6	0.618252
				LOC729342	0.592716	PHTF1	0.616636	CENTD2	0.617861	PRKCH	0.617395
				LOC728553	0.592092	TRERF1	0.613893	HNRPA1L-2	0.617392	PPP3CC	0.615688
				HNRNPA2B1	0.590834	TMEM64	0.613782	LOC654103	0.616783	OSBPL3	0.614713
				LOC653972	0.58639	SH2D2A	0.613435	NACA2	0.615089	EHBP1L1	0.614678
				PTOV1	0.585341	PSMA6	0.613223	ATP5G1	0.614327	NFKBIB	0.614399
				LOC346887	0.581324	CCDC65	0.612656	ZNF419	0.613862	PELO	0.612769
				AMN1	0.581315	GLB1	0.612523	BCL9	0.61357	HSPA5	0.612531
				FAM13AOS	0.580603	TESK1	0.607877	ATP6V0A1	0.612948	ACTR2	0.61249
				CCRK	0.580518	KEAP1	0.607394	METTL1	0.610047	IFNGR1	0.612428
				LOC100129599	0.579385	SELT	0.606799	LOC391578	0.609801	BOLA2	0.609974
				RBM5	0.578761	TSPAN5	0.606772	GTPBP3	0.6087	CLPTM1	0.609823
				LOC388789	0.578456	MRLC2	0.606642	PPAP2A	0.607988	LOC728138	0.609268
				PSMB5	0.577446	MYL12A	0.606592	LOC644338	0.605721	ZBTB43	0.608134
				TMEM30B	0.577419	GTF2E2	0.605766	HSF2	0.605652	DEF8	0.606617
				MYST1	0.576045	ZCCHC6	0.603492	KLHL22	0.604855	SLC4A4	0.606228
				LOC440957	0.575882	LUZP1	0.602344	LOC100128936	0.604362	UGCGL1	0.606173
				WHAMML1	0.573763	COMTD1	0.600615	LOC100129599	0.602923	ATP6V0D1	0.605038
				FAM89A	0.572607	CCDC12	0.599594	LOC392008	0.602587	TGFBRAP1	0.604413
				MAP4K2	0.572548	GLO1	0.599192	LOC653232	0.602384	AES	0.603698
				SLC25A37	0.57197	PSCD4	0.599026	LOC388588	0.60131	NTAN1	0.602877
				HDAC7A	0.570642	GOLPH4	0.598426	LOC727984	0.600307	STAT4	0.602537
				LOC100128083	0.570433	MOCS1	0.598144	IL16	0.599507	SGSM1	0.601607
				MYL5	0.569004	GLA	0.598106	LOC391811	0.599019	SHISA5	0.601501
				LOC730060	0.565148	ITPK1	0.598055	RPP40	0.598	TBKBP1	0.597864
				LOC100134304	0.564815	PTCH1	0.597774	LOC647150	0.596961	CAP1	0.596186
				RPS15A	0.564521	LAMP2	0.594574	LETMD1	0.596657	RECQL	0.596036
				POP5	0.564296	ILK	0.594488	CTPS2	0.596616	YWHAZ	0.594796
				CCDC45	0.56362	KATNAL1	0.594366	LOC402112	0.596409	HN1	0.5936
				TMEM66	0.561209	PANK2	0.592686	SLC2A14	0.594118	LOC644237	0.593576
				NDFIP1	0.559545	MXD1	0.591833	RPL4	0.593235	CFL1	0.592761
				CEP63	0.559189	CAPN1	0.590197	CA6	0.592984	ENDOD1	0.590175
				ALDH3A2	0.5572	PSME1	0.590087	PFAS	0.592775	IER2	0.588958
				CHCHD7	0.555927	CENTD1	0.590041	LOC90624	0.592191	CREB3L2	0.586882
				SLC22A23	0.555258	FOSL2	0.589838	DPH2	0.590662	SEC61A1	0.585395
				LOC100131096	0.554607	LRFN3	0.589578	LOC728484	0.58845	COMMD4	0.585276
				ZMYND8	0.554462	FUT11	0.58954	CCDC66	0.588293	RRAGC	0.58496
				UXT	0.552359	SLC39A11	0.589188	RBMX	0.587388	MGAT2	0.584219
				ARHGEF10	0.551415	NDUFB10	0.587738	CSNK2A2	0.587192	ZBTB17	0.584099
				ANXA11	0.55115	PDIA6	0.587472	UQCRH	0.586811	MFSD5	0.584058
				ZCCHC11	0.549541	FAM102B	0.586815	LOC100131187	0.586581	NUSAP1	0.58309
				LOC646197	0.549059	BOLA2	0.586718	ACN9	0.583534	ADCY7	0.582858
				MAP4K4	0.547768	RCAN1	0.586326	LOC648526	0.583518	TMBIM6	0.582262
				PVT1	0.546924	LIPA	0.585676	LOC653778	0.583382	KBTBD8	0.582049
				STRBP	0.545244	LOC441019	0.585458	NDUFS4	0.583163	MLEC	0.581267
				NSA2	0.545225	MARCH2	0.584933	ATIC	0.582812	GNB1	0.581062
				SNORD12C	0.54484	ATP6V1A	0.583749	RGMB	0.582174	ACADVL	0.579976
				LOC255783	0.543404	CTSD	0.583311	APP	0.581878	CALCOCO1	0.579383
				U2AF1L4	0.542506	ETFA	0.581793	LOC387825	0.580542	ARSA	0.578699
				NACA2	0.541098	RABAC1	0.581575	BBS2	0.577813	ATP2A2	0.576701
				PBX3	0.539349	DEF8	0.579905	LOC653487	0.575863	HMGN4	0.575341
				LAMC3	0.539171	TINF2	0.57859	PARP3	0.575607	LRRC33	0.574845
				RBMX	0.538875	ARPC1B	0.577065	LOC729646	0.575565	FICD	0.574336
				CAMSAP1L1	0.538783	CD244	0.575675	REXO4	0.57552	LBA1	0.573661
				LOC641518	0.536475	ARPP19	0.57554	GPC2	0.574796	CHST10	0.572212
				HAX1	0.535586	ELP3	0.572988	LOC100132547	0.574754	LRRC57	0.570151
				PRPSAP2	0.534493	ZFAND2A	0.572937	TYSND1	0.574709	PCGF1	0.569943
				C1QTNF6	0.533777	GCLC	0.572712	TSEN2	0.574634	MOCS1	0.568847
				SH2D3A	0.533355	PSMB3	0.572186	USP11	0.573573	AMZ2	0.567644
				EMR4	0.532267	TBC1D19	0.570259	LOC728380	0.571212	CHD9	0.567516
				PPARD	0.529879	SLC38A10	0.569373	LOC387841	0.570712	BTN3A2	0.567316
				RHPN1	0.525203	CYB5R3	0.567989	PTDSS1	0.570707	TRAM2	0.567241
				POLR3E	0.525177	LOC644563	0.567762	USP6NL	0.569813	TIAF1	0.565868
				SFRS13A	0.524656	CIP29	0.565474	LOC203547	0.569412	SC4MOL	0.565831
				SIN3A	0.524535	HSP90AA1	0.564567	KCNQ1	0.569223	MAN1A1	0.565167
				KLHL28	0.523407	IL2RG	0.564158	LOC652608	0.569153	ATXN1L	0.564769
				LOC100129977	0.521892	HSP90B1	0.563073	LOC648210	0.568704	ADRM1	0.564555
				LOC646278	0.521434	PRIC285	0.562924	TOMM22	0.568566	MYO3B	0.56307
				AQP3	0.521168	BFSP1	0.561335	MPHOSPH8	0.568114	TBPL1	0.562648
				FAM44B	0.519626	PIGT	0.561095	RNF144	0.568009	SPIRE1	0.562246
				LIMS2	0.51874	CYB5R4	0.560821	ZNF329	0.566334	CRKL	0.562105
				DAP3	0.518535	TCTEX1D2	0.560359	CR2	0.565557	PRR14	0.561957
				TNFRSF10D	0.51825	LOC100130092	0.559226	C2CD2	0.564484	IFI27L2	0.561131
				MMD	0.517434	VPS26B	0.5587	LOC644745	0.564395	PSMB2	0.559833
				SULT1B1	0.513214	ARHGDIA	0.558439	TMEM118	0.563323	XPNPEP2	0.558813
				UQCC	0.512336	PTPRA	0.557802	ZZZ3	0.562925	HYOU1	0.558601
				PELP1	0.512193	PSMB10	0.557435	TBRG4	0.562439	ROD1	0.558578
				CD79A	0.511968	CTSS	0.555528	LOC644384	0.562141	KCTD9	0.557943
				SAFB2	0.511027	RECQL	0.553144	LOC391045	0.559309	SIRT7	0.55756
				OCM2	0.509422	FAM104A	0.553113	WDR75	0.558729	TMCO1	0.557272
				ZBTB16	0.508992	LOC644677	0.553096	HIST2H4B	0.55869	RAB5B	0.554986
				ATP5O	0.507998	HSPA5	0.552911	NDE1	0.555423	PIP4K2C	0.554623
				LOC441461	0.50731	HEXB	0.551575	RANBP6	0.555283	MKNK1	0.551971
				REM2	0.505697	TTYH2	0.550958	DDX21	0.555147	ZNF276	0.55097
				HELQ	0.504691	SLC1A5	0.549903	LOC441073	0.553493	PLEKHA5	0.550841
				PPP1R3F	0.502823	PRR13	0.549461	MRPS31	0.550318	CCDC12	0.549406
				DEAF1	0.501752	SIRT2	0.549185	LOC143543	0.550028	BRMS1L	0.549117
				ZNF419	0.501437	LOC221710	0.548908	RPP21	0.549966	FKBP11	0.549029
				LOC646200	0.501126	UBE2J1	0.548846	LOC100132496	0.548723	RIPK3	0.548663
				METTL1	0.498428	RAB35	0.548326	SCARNA16	0.547675	ST8SIA4	0.548629
				MRRF	0.498003	OGFRL1	0.547951	DGCR6L	0.545963	TUSC4	0.548576
				LOC401640	0.497008	ZNF364	0.547545	DDT	0.545957	TMEM43	0.548423
				FAM165B	0.495696	TCEB3	0.546804	MRPS35	0.545888	HYLS1	0.545914
				CSNK2A2	0.493296	EIF4E2	0.545348	THYN1	0.545033	UTP11L	0.54522
				NR2C1	0.492266	GDE1	0.545298	SH3RF3	0.544868	PSME1	0.544836
				GAMT	0.490132	BPGM	0.543407	MT3	0.544685	PTCH1	0.542559
				ALKBH2	0.489358	LOC54103	0.539393	RPA3	0.544592	TRIM26	0.542044
				SMPD1	0.488631	RNF135	0.539042	DARS	0.543766	SLC1A5	0.540108
				USP6NL	0.487031	PSMA3	0.538176	TLK1	0.541273	PPP2R1B	0.539589
				KBTBD9	0.484491	FAM45A	0.537066	LOC100128423	0.539319	TNFSF10	0.539401
				MKI67IP	0.484319	PPP2R3C	0.535617	BTF3L4	0.539215	NAPB	0.538439
				PPP1R14A	0.482498	IMPAD1	0.534766	HK2	0.538786	RAPGEF2	0.538036
				LOC728743	0.481458	LOC100129034	0.534328	TMEM66	0.537376	CD3D	0.536237
				SLC37A3	0.4807	ATP5I	0.5336	DGCR6	0.53667	GALK1	0.536002
				LOC647588	0.480256	FCHO2	0.533437	MYH3	0.535953	KLHL21	0.535057
				CYP2J2	0.480239	PSME4	0.53336	LOC728207	0.535762	ACTR1A	0.534689
				RNF145	0.479979	HERPUD2	0.533005	APPBP2	0.535742	RBM18	0.533416
				ZNF792	0.479828	SEC61A1	0.53117	TKT	0.535099	TTYH2	0.533244
				IKBKE	0.479145	NXT2	0.530146	LOC389787	0.533639	GLB1	0.532429
				LOC100131735	0.478781	PCBP4	0.529302	FARS2	0.532927	ELOF1	0.531276
				EP400	0.477565	DDOST	0.528547	RPS5	0.531562	H3F3A	0.529324
				POLD2	0.473727	ARFGAP3	0.526764	CEP68	0.530552	LSMD1	0.528899
				ANP32B	0.471888	ADAP1	0.525878	RALA	0.530394	CD247	0.527694
				ASB13	0.471737	DPH3	0.523405	SFMBT1	0.530101	ACSL5	0.527539
				TTC27	0.470019	ODC1	0.522354	LOC728979	0.528889	KIF21B	0.527124
				LOC400713	0.466919	DAZAP2	0.521313	ZNF609	0.527653	IL12A	0.525135
				TLR5	0.464298	WDR41	0.519126	THAP11	0.524555	STARD3NL	0.523069
				NUDT16L1	0.463979	STK40	0.517469	EEF1E1	0.523764	FLJ46309	0.522532
				CNOT7	0.462633	RBM18	0.517228	ZBED3	0.523758	FCGR3B	0.522402
				RGL1	0.462268	STARD3NL	0.515544	SDCCAG3	0.522975	CLIP1	0.521511
				TCEA2	0.460224	YIPF1	0.514207	MAGEH1	0.522961	GPAA1	0.521194
				ORC3L	0.460058	ADRM1	0.514054	LOC641784	0.522916	CBX4	0.520116
				ZNF770	0.459986	SCO2	0.513811	SPNS3	0.522335	PSMB3	0.519936
				LOC143666	0.454594	LOC440926	0.513561	RNFT2	0.521974	LOC100129034	0.51837
				KLRAQ1	0.451948	PPPDE1	0.511372	LOC100129742	0.521873	VAMP3	0.517903
				USP15	0.45094	ZNF654	0.510285	LOC644131	0.521798	PAQR4	0.517432
				DUSP16	0.450728	SLC4A4	0.509766	ACVR1B	0.520997	ARF3	0.51652
				DHPS	0.450556	LOC100134537	0.509639	RRS1	0.519971	EFR3A	0.51128
				LOC100129139	0.450119	ROPN1L	0.508952	ERGIC3	0.518703	SQLE	0.511177
				LSR	0.44708	LSP1	0.508517	EIF4EBP3	0.518362	MAPK7	0.510345
				LOC100133430	0.446961	TRAM2	0.508373	CNOT7	0.518071	GLB1L2	0.509133
				POLR1C	0.446465	AKAP13	0.508242	EXOSC5	0.517511	ZNF821	0.508376
				CR2	0.444741	LOC730455	0.505978	LOC646346	0.512529	WDR1	0.508301
				ZNF844	0.443902	LOC643752	0.50511	SEPHS1	0.511159	TM4SF19	0.507358
				LOC729208	0.441545	SEC24D	0.504999	PHB2	0.510513	PDLIM5	0.506163
				ATG9B	0.439334	UBQLN4	0.504838	CABC1	0.509782	CENTD1	0.505904
				TMEM39B	0.435347	NEU1	0.503721	UXT	0.508472	TOR1B	0.505496
				FBXO15	0.432166	BCAP31	0.501154	FAM195A	0.50802	HSBP1	0.505142
				LOC653980	0.427532	LOC387895	0.500345	SLC27A5	0.507711	APAF1	0.504785
				NOL9	0.425506	INPP1	0.499672	NAT10	0.505573	MYO9B	0.504039
				ATP5E	0.406936	C3AR1	0.499378	LOC653980	0.504023	ELMO2	0.503324
				KNTC1	0.405707	NUSAP1	0.498636	LOC388789	0.503879	EYA3	0.503127
				RPRD1A	0.405567	ANKRD33	0.498409	MSRA	0.503648	BFSP1	0.502297
				ZNF815	0.404937	COPS8	0.49724	NOL11	0.503434	RHEBL1	0.501968
				LOC730173	0.403708	H3F3A	0.496679	EFHC2	0.503187	FBXW2	0.501724
				NR3C1	0.401751	GSK3B	0.495296	SEPN1	0.502282	FUT11	0.50117
				ACVR1B	0.384412	TMEM50B	0.493717	PQBP1	0.502206	LRFN3	0.499681
				GNA11	0.366732	PTMS	0.490339	LOC646966	0.501907	TMEM111	0.498184
						TARS	0.489916	PPA2	0.500709	OAZ1	0.497867
						CPNE8	0.488809	LOC442181	0.499198	SPOPL	0.494293
						ELOVL1	0.48551	ABCE1	0.498944	TMED1	0.49235
						TXNL2	0.483775	ZNF75A	0.498633	LAP3	0.492343
						BRPF1	0.483745	TM7SF2	0.498425	NACC2	0.490512
						DCTN1	0.483417	TACO1	0.497529	CABLES2	0.490201
						RNF181	0.481338	LOC649299	0.493325	KIAA0368	0.487693
						MTE	0.477275	DDX42	0.492557	LASS2	0.487587
						GPN1	0.477158	FLJ45244	0.489225	PRR5	0.48664
						STX7	0.47572	ARMCX1	0.488776	COBRA1	0.485606
						LOC728368	0.475041	MUC1	0.488685	TOPBP1	0.485088
						ZFYVE21	0.474967	KLHL36	0.4874	LOC728666	0.484669
						CENPB	0.473139	NECAP2	0.487348	CMKLR1	0.481896
						ATP5B	0.469721	KIAA0495	0.48595	SLC30A1	0.481154
						VTI1B	0.469422	MARCH3	0.485049	PCNXL3	0.480025
						TMEM189	0.469043	LOC728179	0.484453	AHCYL1	0.479687
						MIR155HG	0.466446	KLHL29	0.48395	SCRIB	0.476943
						SCAMP4	0.466417	FBXO15	0.483933	PDCD10	0.476349
						HYLS1	0.463939	METTL5	0.482905	LRRFIP2	0.476036
						EYA3	0.463857	LRRC8D	0.482869	PTPRA	0.47565
						PCGF1	0.463327	SULT1B1	0.481744	TMEM127	0.475484
						ATG4A	0.461751	VSIG1	0.477248	PSMC2	0.474194
						ST7	0.46091	LOC440595	0.475574	ZFYVE21	0.473876
						NEDD8	0.460739	LOC729684	0.473329	CBLL1	0.472855
						SF3B4	0.460571	DAP3	0.472854	LSM1	0.472134
						TRA1P2	0.459983	DOCK9	0.472604	LOC728037	0.470517
						NFKBIE	0.459597	TSPAN4	0.470882	CTBP1	0.470343
						ANXA2P3	0.459198	SNORA33	0.4703	TAF5	0.469949
						ITGAV	0.459116	SNORA7B	0.469851	HCFC2	0.46983
						FBXW2	0.459102	FLJ39639	0.469545	SGPL1	0.469425
						ZAK	0.457784	LOC728992	0.469332	SEMA4B	0.469294
						LASS2	0.457344	SPHK2	0.467131	ARID3A	0.466649
						SFT2D2	0.457181	ZNF134	0.466907	TXNRD1	0.464907
						EIF2C4	0.456732	LRRC16	0.46563	HLA-DPB1	0.464268
						SESN2	0.451833	CLN5	0.465605	LLGL1	0.463843
						TMEM127	0.449813	CCS	0.46538	ST7	0.461899
						TAOK3	0.449347	LOC100128548	0.465347	PSMA6	0.461376
						ZBTB8OS	0.44923	PRKRA	0.465093	VPS16	0.460398
						SNX24	0.447415	LOC100134209	0.46456	GAK	0.46025
						LOC100131859	0.445524	PSMG4	0.464137	CEBPG	0.459634
						TAP2	0.445394	LOC388532	0.462915	LOC100129104	0.457602
						ARHGAP26	0.443421	PODXL2	0.462719	SLCO4C1	0.456921
						PARP4	0.441394	KLHL2	0.461123	RIOK3	0.45561
						GIYD1	0.439838	CIAPIN1	0.459298	SRPK2	0.455454
						RRAGC	0.437708	LOC100129335	0.458914	ZFYVE28	0.455032
						ATP5F1	0.436591	UQCC	0.458186	PLCB1	0.453799
						ZDHHC24	0.436161	RPL29P2	0.456456	EIF2C4	0.452379
						RNPEPL1	0.435709	LOC727947	0.455427	USP46	0.452083
						RHEBL1	0.430739	UBASH3B	0.454522	FAM102B	0.451813
						LOC646674	0.430272	TDP1	0.454479	DENND4C	0.451497
						USP46	0.4216	PET112L	0.453338	ZNF77	0.451145
						SYNE1	0.419129	AFG3L2	0.450225	FAM49A	0.450953
						ATP6V1B2	0.418943	LOC100133390	0.448952	DCTN1	0.449796
						PSMA2	0.418774	N6AMT2	0.448926	LOC387895	0.449326
						RPL41	0.416769	THOC3	0.448433	LOC729580	0.448278
						LOC642076	0.404417	LARS	0.446106	PATL1	0.446064
						VRK2	0.400813	LOC730255	0.446036	INPP1	0.445211
						PDE5A	0.398197	ZCCHC9	0.445942	HEXB	0.439817
						GAB2	0.395076	POLR1C	0.445194	LOC284757	0.439671
						SRI	0.387715	LOC728428	0.442914	GCLC	0.43912
						LOC648742	0.387174	RPS13	0.438801	DPP3	0.435646
						KIAA0196	0.382755	NT5DC3	0.438561	LOC646674	0.433644
						RHOF	0.370276	LRPPRC	0.438101	AGK	0.433229
								SP110	0.436717	RCAN1	0.43301
								BCKDHB	0.436344	NFKBIE	0.432233
								PRMT6	0.434687	DLG3	0.425364
								MRPS26	0.433936	YIPF1	0.419503
								TTC3	0.432996	MIR155HG	0.416911
								LOC100129539	0.432003	LOC642513	0.415932
								BRI3P1	0.430448	PIGT	0.413066
								LOC402694	0.429337	OGFRL1	0.411816
								RPL21	0.428731	PPP2R5B	0.410418
								LOC729397	0.428062	LRP8	0.405095
								BEX1	0.426332	C3AR1	0.40435
								GSPT2	0.424996	GATAD2A	0.401542
								LOC646200	0.423849	NARF	0.39748
								UBXN1	0.421836	DNAJC3	0.390223
								ARHGEF4	0.419725	ZCCHC8	0.386966
								DHX58	0.417583	FAM83D	0.386699
								ZNF776	0.416922	DPH3	0.385093
								AARSD1	0.411432	NDUFA9	0.384705
								TAF6L	0.411281	APLP2	0.38116
								ZNF22	0.409893	LOC641972	0.380549
								LOC100134563	0.408032	PPARA	0.378697
								CRB3	0.406079	LOC400174	0.371606
								DNMT1	0.405126	KATNA1	0.368712
								ACP6	0.403373	ANKRD54	0.363281
								LOC729212	0.396721	MGC71993	0.359985
								POLD2	0.396323	MAP4K5	0.355847
								GPATCH4	0.386678	HSPA1B	0.348425
								TCTN1	0.370091	PSMD2	0.325537
								LOC130773	0.366602	MYO6	0.314
								LAS1L	0.365712
								ERI3	0.362034
								NCF1C	0.351987
								ZNF813	0.340625
