# Supplementary figures and images for: The transcription factors Runx3 and ThPOK cross-regulate acquisition of cytotoxic function by human Th1 lymphocytes
Source: eLife journal article supplement (doi:10.7554/elife.30496), 2018-02-28

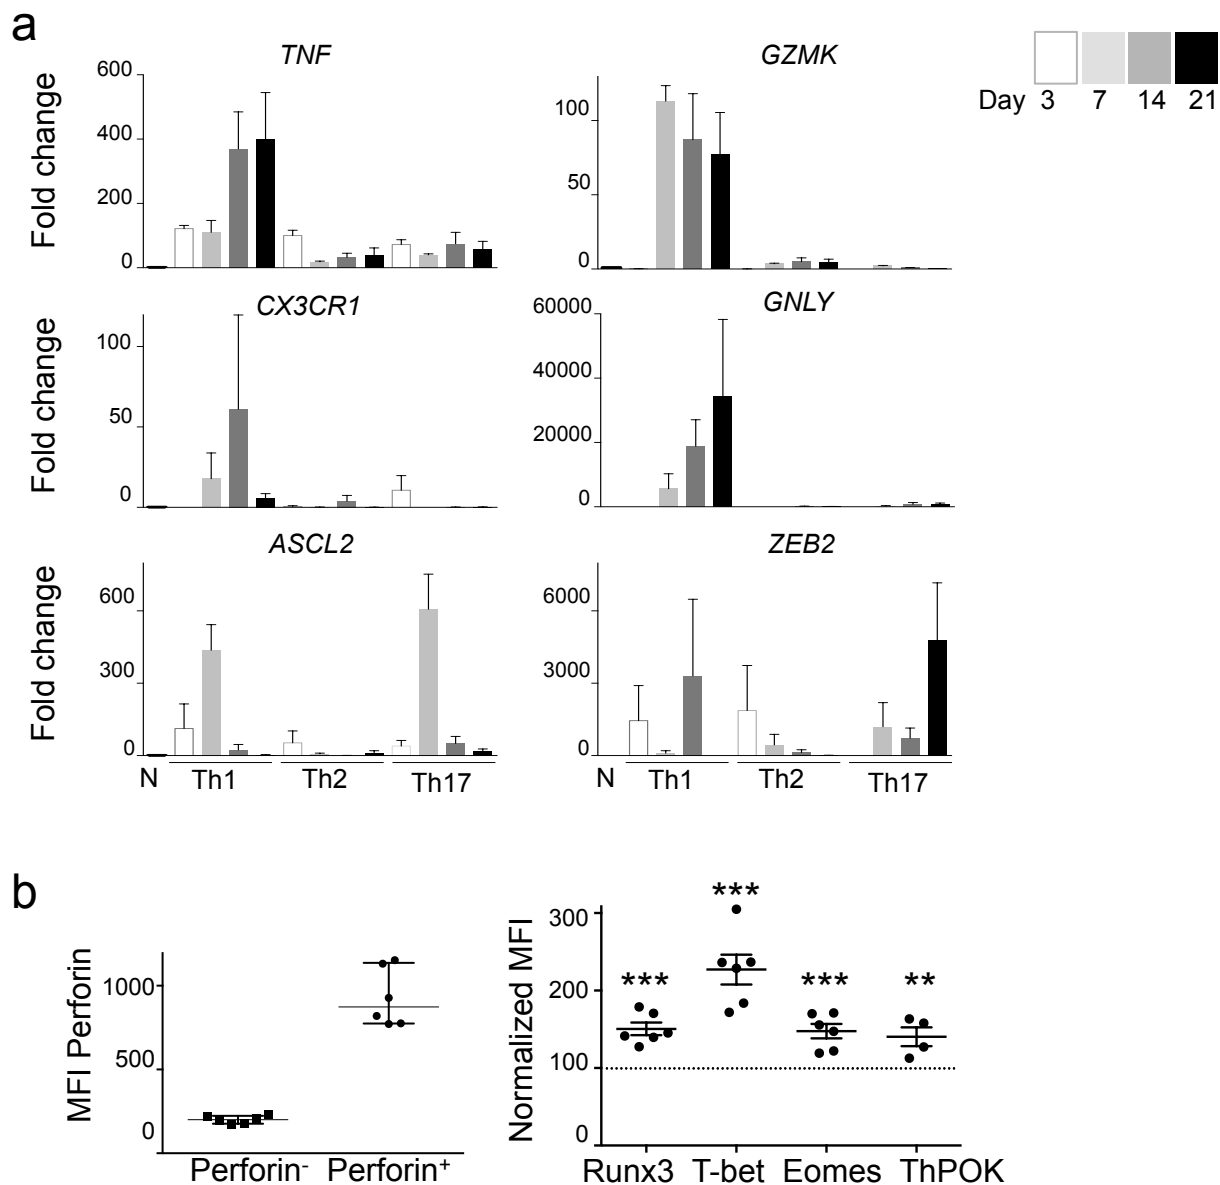

Supplement: supp [file elife-30496-supp-v1.zip]
